# Supplementary material for: Unusual Formation of 1,2,4-Oxadiazine Core in Reaction of Amidoximes with Maleic or Fumaric Esters
Source: MDPI journal article supplement (doi:10.3390/molecules27217508), 2022-11-03
Supplement: s1 [file s1]

**Supporting information**  
**for**

Sofia I. Presnukhina<sup>1</sup>, Marina V. Tarasenko<sup>2</sup>, Kirill K. Geyl<sup>1</sup>, Svetlana O. Baykova<sup>1</sup>, Sergey V. Baykov<sup>1</sup>, Anton A. Shetnev<sup>2</sup>, and Vadim P. Boyarskiy<sup>1,\*</sup>

*<sup>1</sup>Institute of Chemistry, Saint Petersburg State University, Universitetskaya Nab., 7/9, 199034 Saint Petersburg, Russian Federation*

*<sup>2</sup>Pharmaceutical Technology Transfer Centre, Yaroslavl State Pedagogical University Named after K.D. Ushinsky, Respublikanskaya St., 108, 150000 Yaroslavl, Russian Federation*

\*Corresponding authors: e-mail: v.boyarskii@spbu.ru.

## Content

|                                                                                                                                      |    |
|--------------------------------------------------------------------------------------------------------------------------------------|----|
| 1. Copies of $^1\text{H}$ , $^{13}\text{C}$ , and $^{19}\text{F}$ NMR spectra for compounds <b>3</b> , <b>4</b> , and <b>5</b> ..... | 3  |
| 2. X-ray diffraction data .....                                                                                                      | 51 |

# 1. Copies of $^1\text{H}$ , $^{13}\text{C}$ , and $^{19}\text{F}$ NMR spectra for compounds 3, 4, and 5

$^1\text{H}$  and  $^{13}\text{C}$  spectra of 2-(5-oxo-3-(4-methylphenyl)-5,6-dihydro-4*H*-1,2,4-oxadiazin-6-yl)acetic acid **3a**

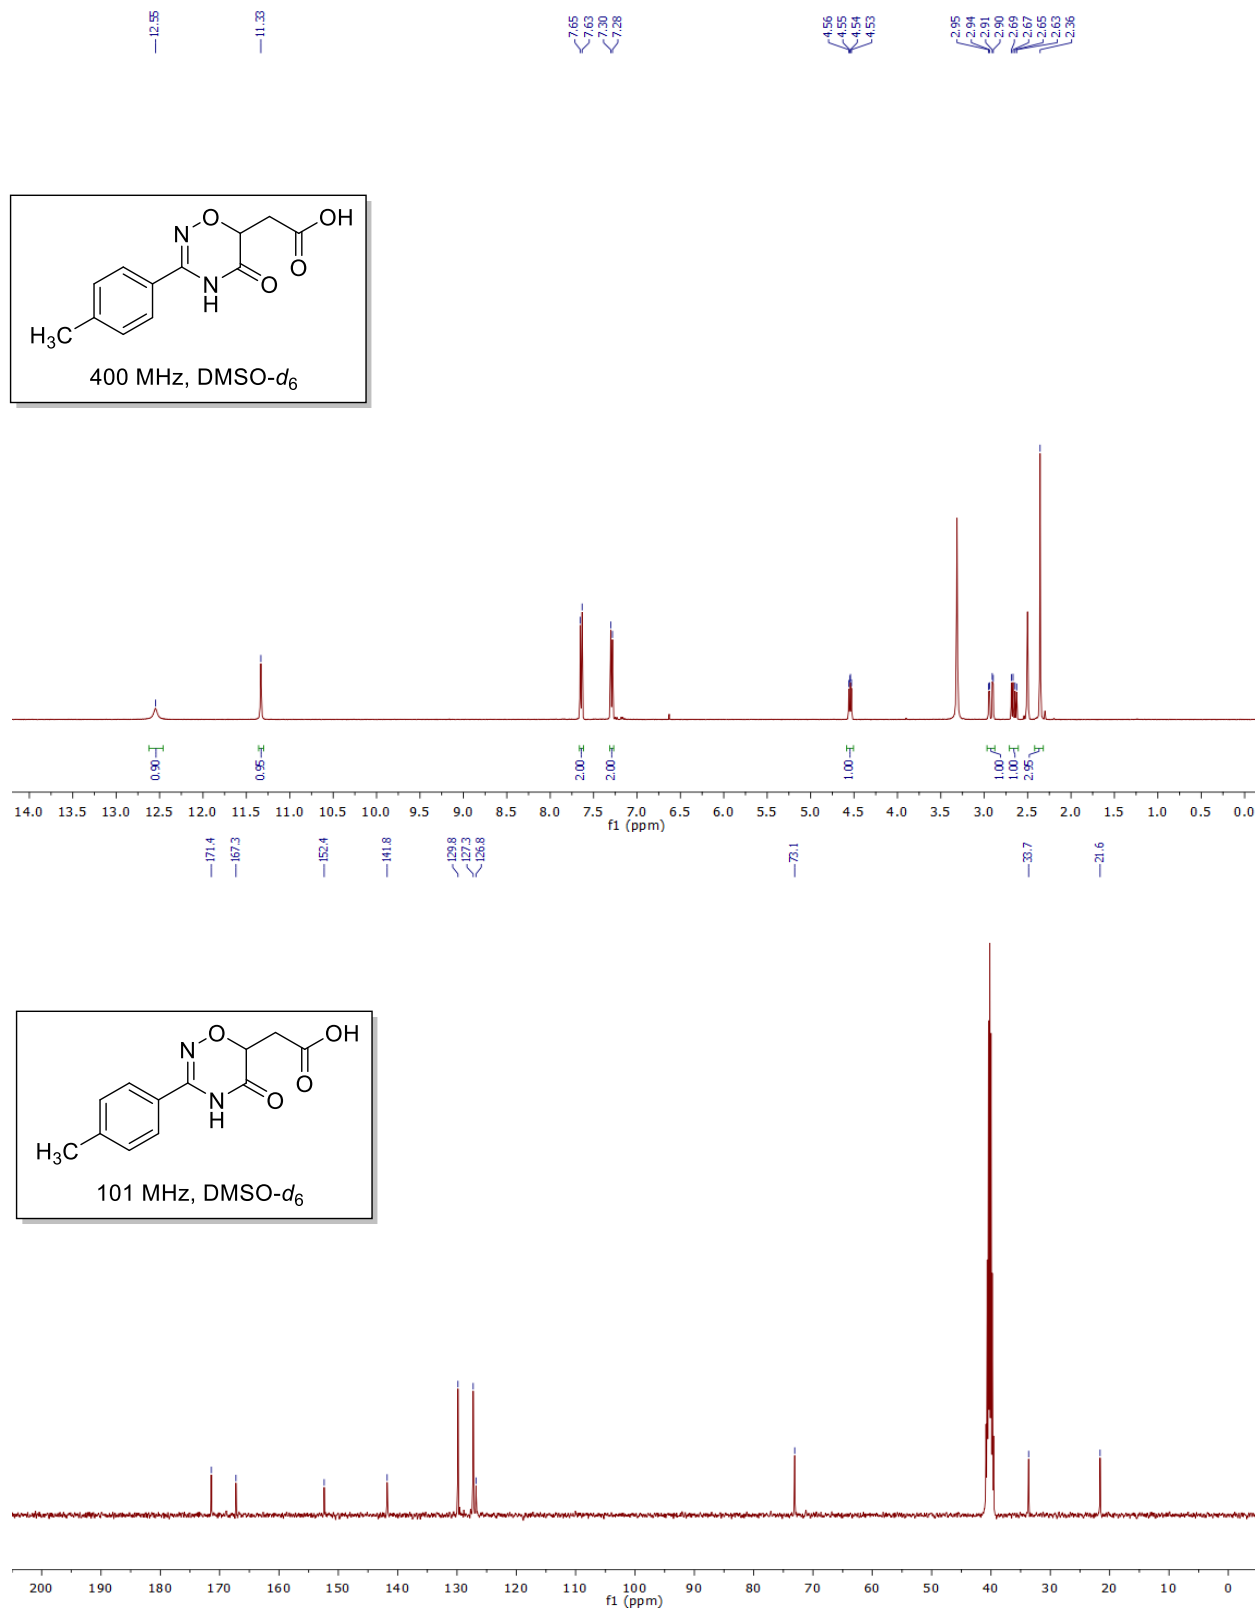

$^1\text{H}$  and  $^{13}\text{C}$  spectra of 2-(5-oxo-3-phenyl-5,6-dihydro-4*H*-1,2,4-oxadiazin-6-yl)acetic acid **3b**

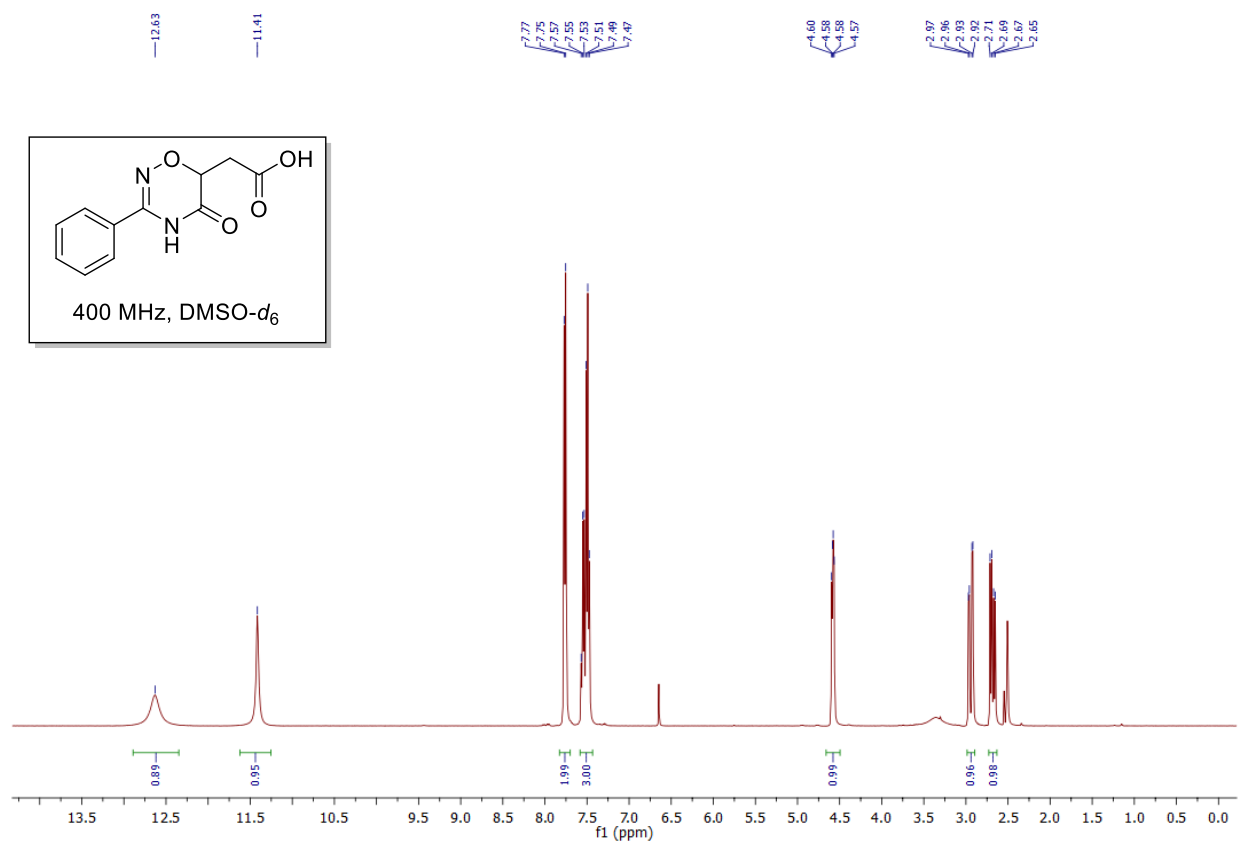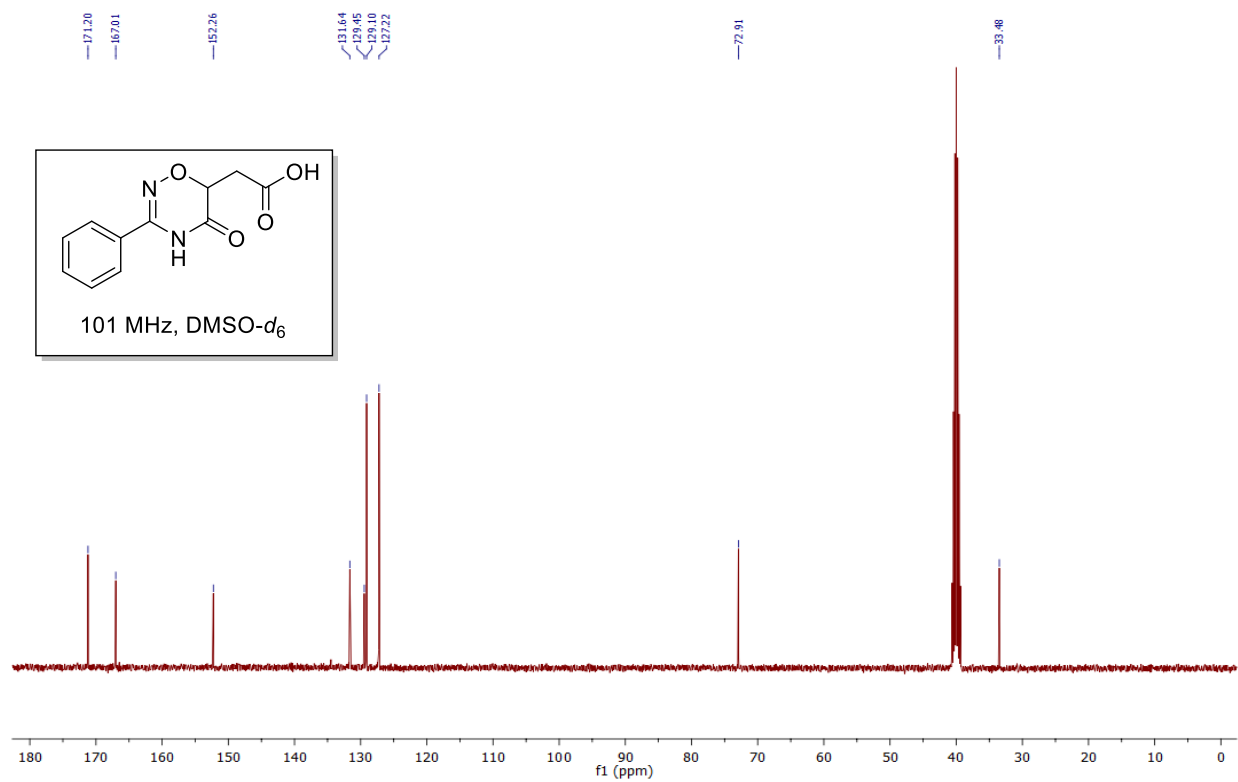

$^1\text{H}$  and  $^{13}\text{C}$  spectra of 2-(3-(4-methoxyphenyl)-5-oxo-5,6-dihydro-4*H*-1,2,4-oxadiazin-6-yl)acetic acid **3c**

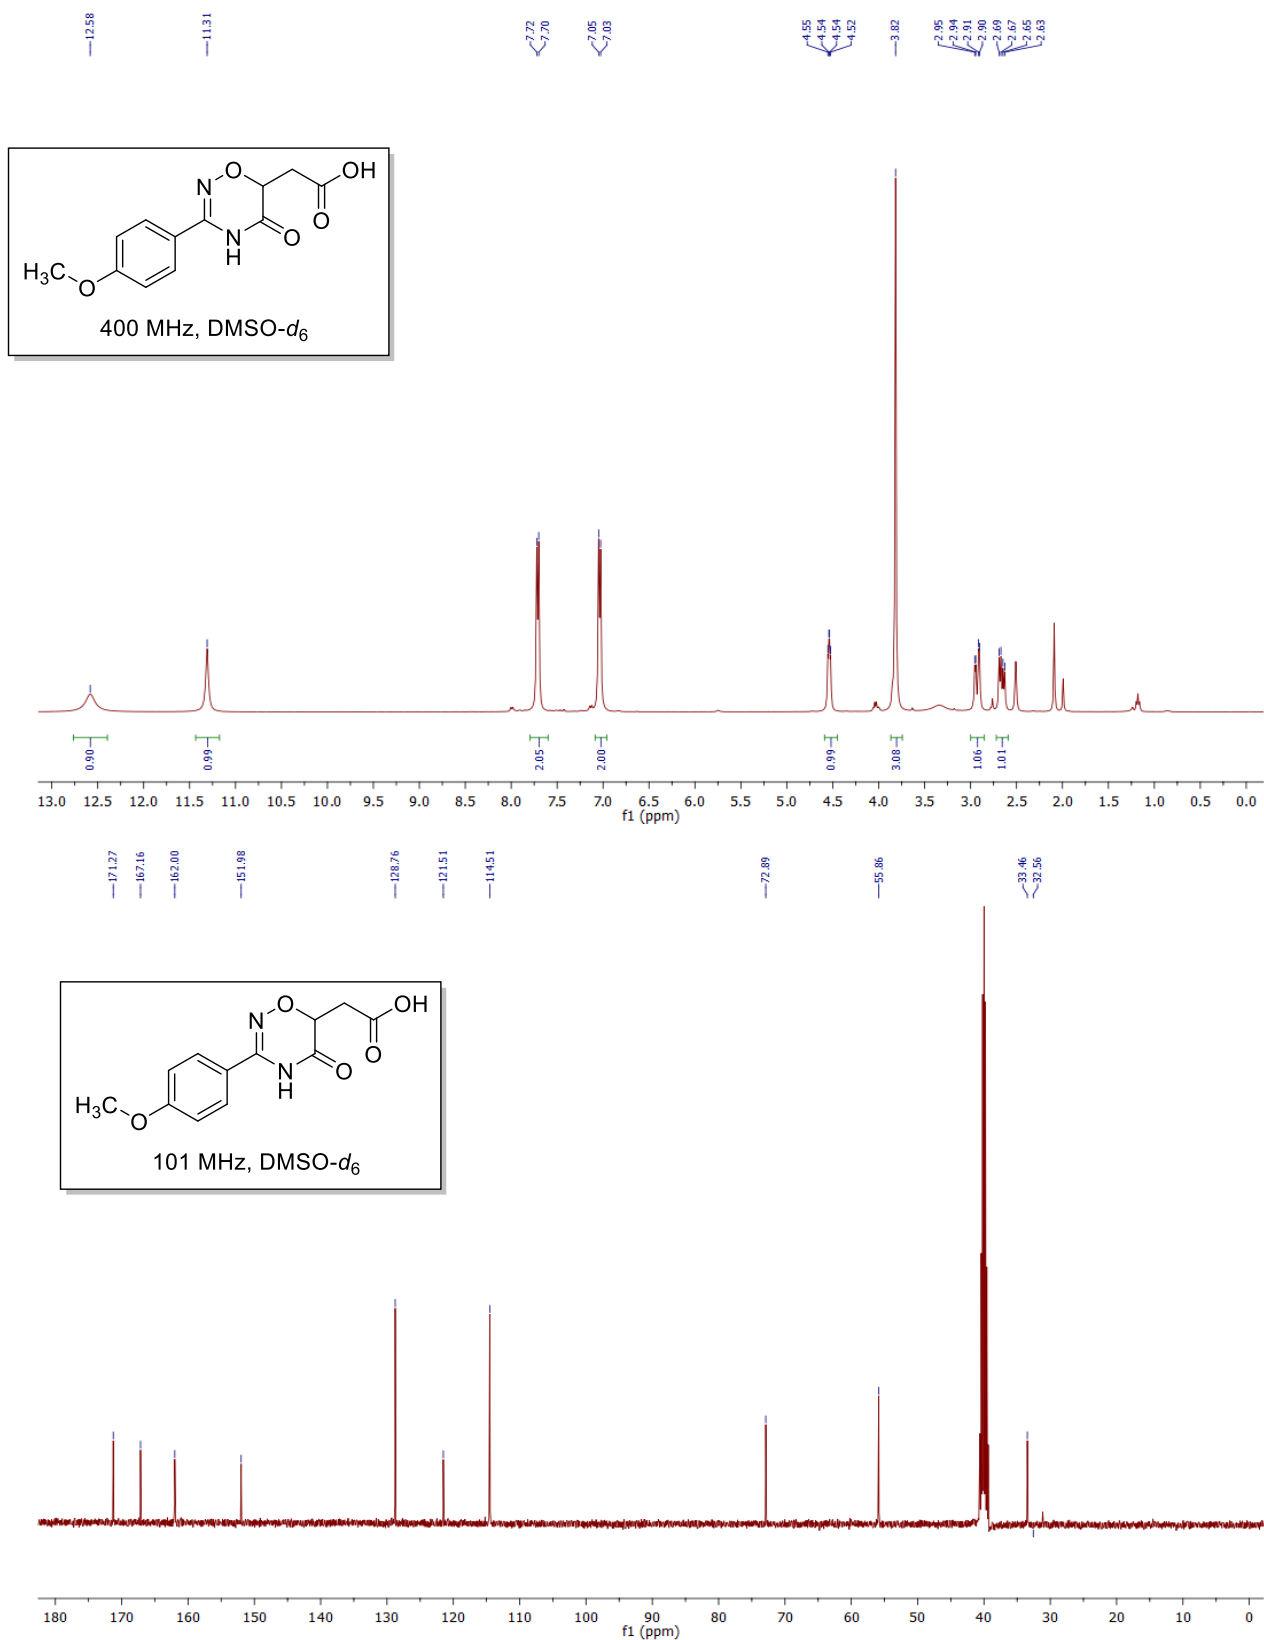

$^1\text{H}$  and  $^{13}\text{C}$  spectra of 2-(3-(4-nitrophenyl)-5-oxo-5,6-dihydro-4*H*-1,2,4-oxadiazin-6-yl)acetic acid **3d**

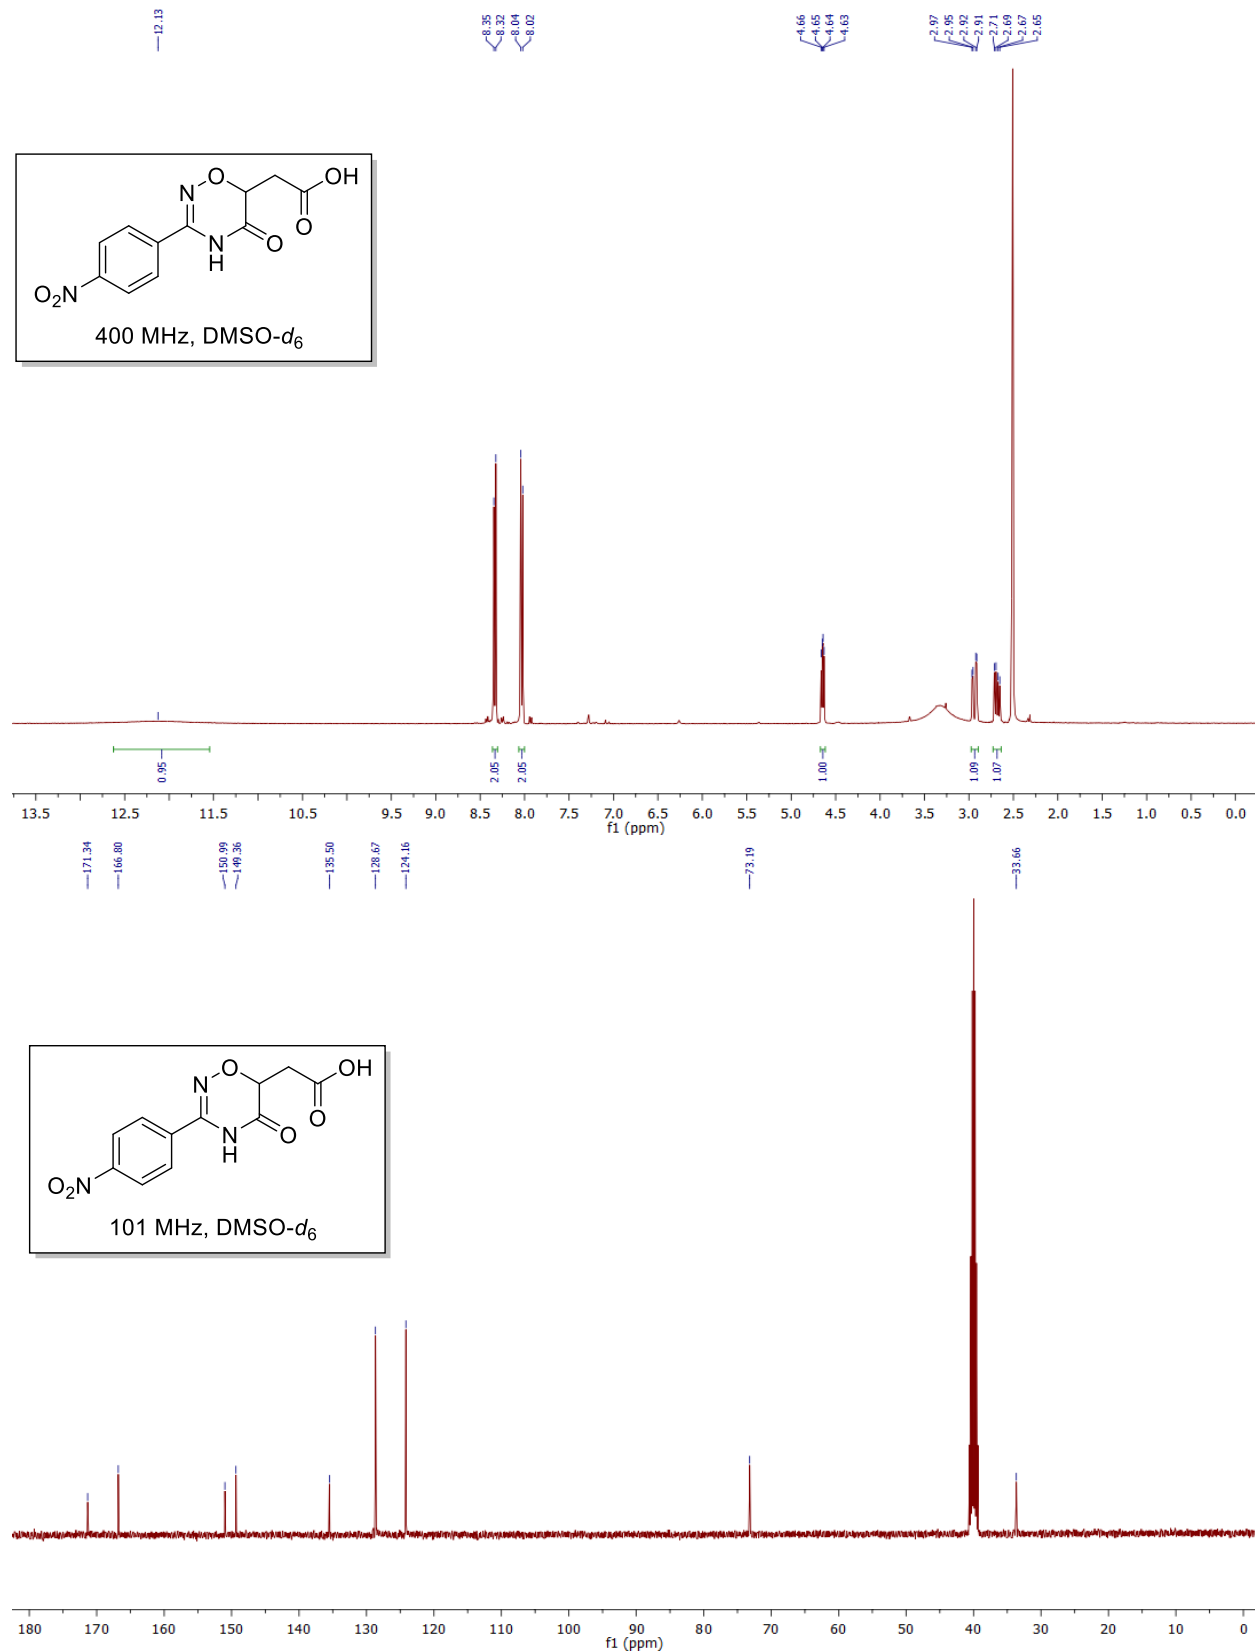

$^1\text{H}$ ,  $^{13}\text{C}$  and  $^{19}\text{F}$  spectra of 2-(5-oxo-3-(4-(trifluoromethyl)phenyl)-5,6-dihydro-4*H*-1,2,4-oxadiazin-6-yl)acetic acid **3e**

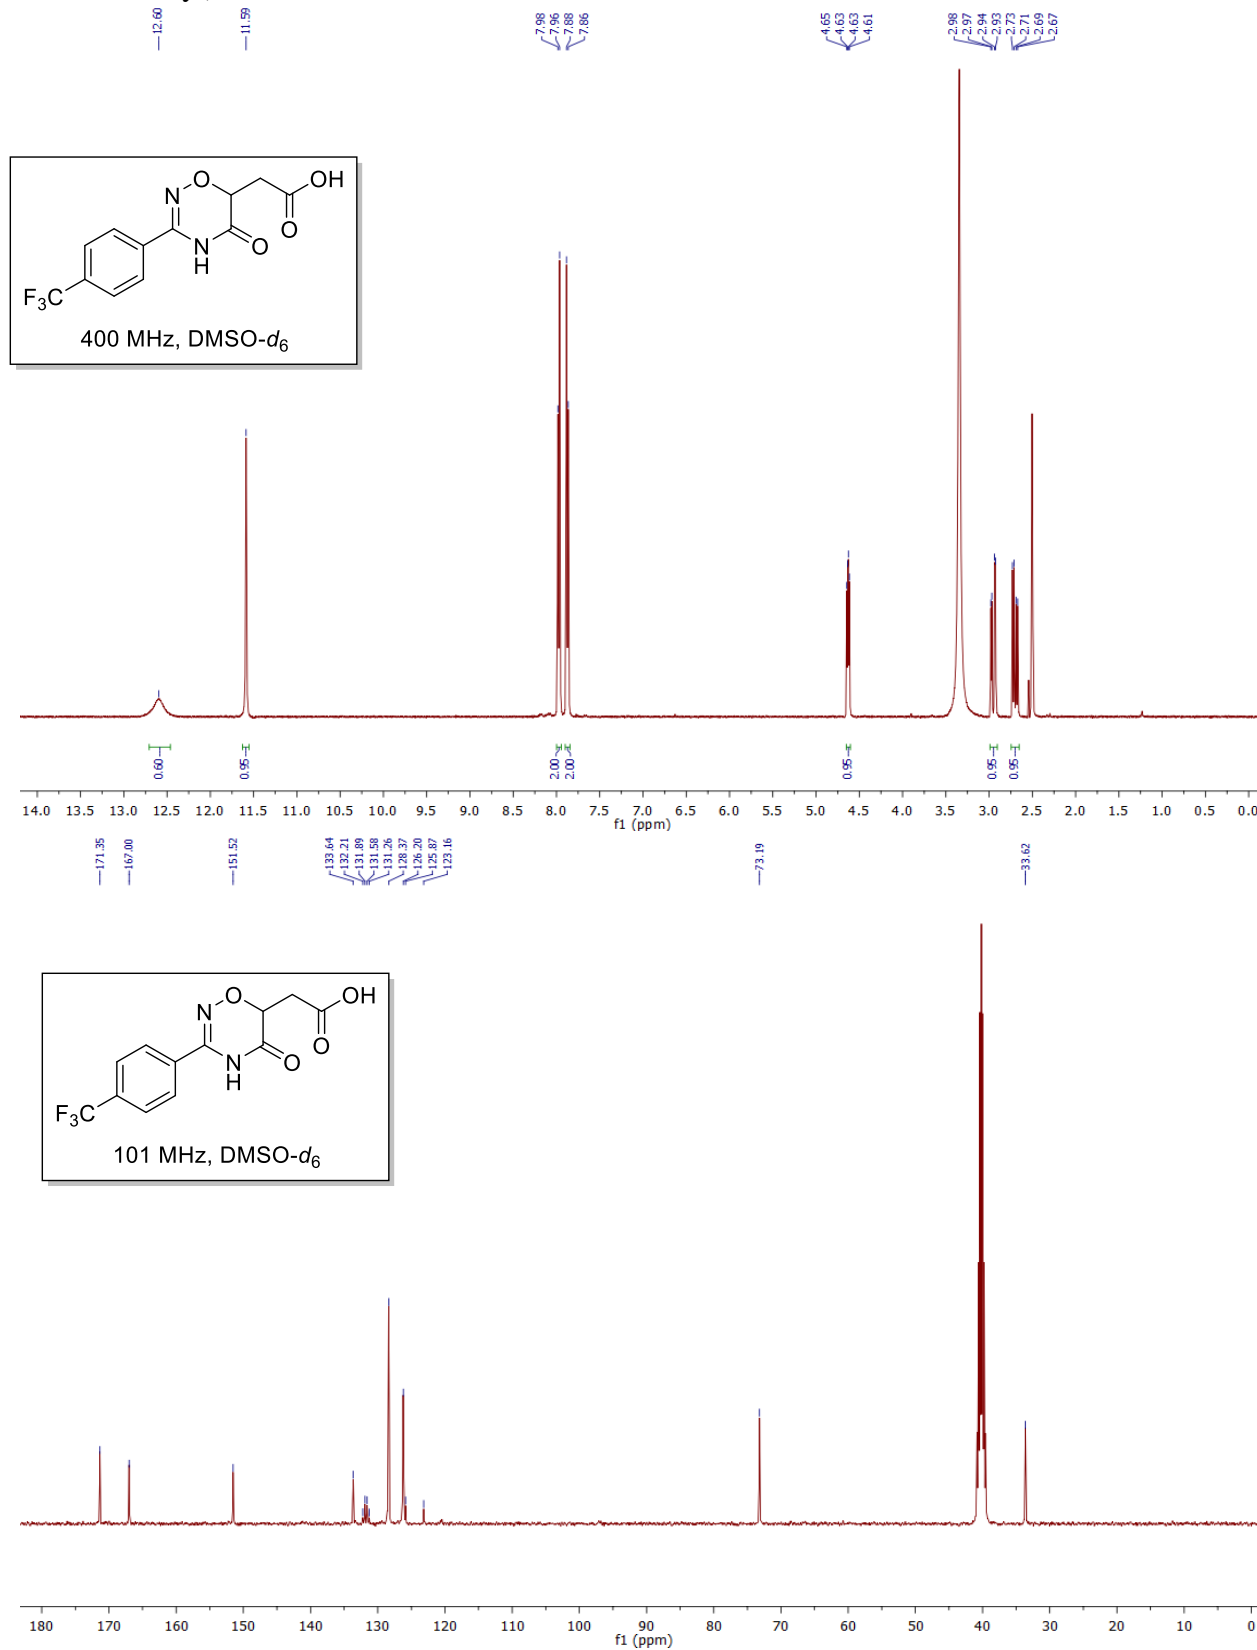

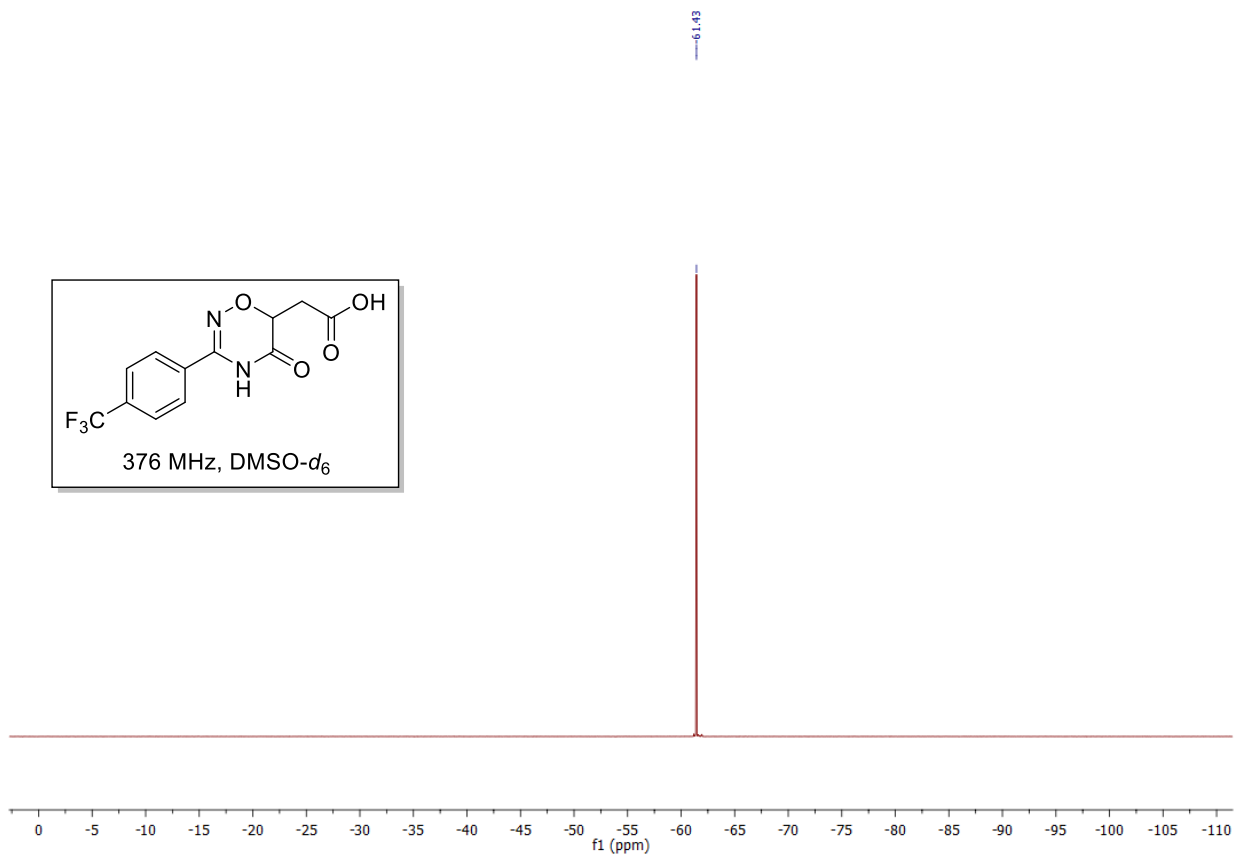



$^1\text{H}$ ,  $^{13}\text{C}$  and  $^{19}\text{F}$  spectra of 2-(3-(4-fluorophenyl)-5-oxo-5,6-dihydro-4*H*-1,2,4-oxadiazin-6-yl)acetic acid **3f**

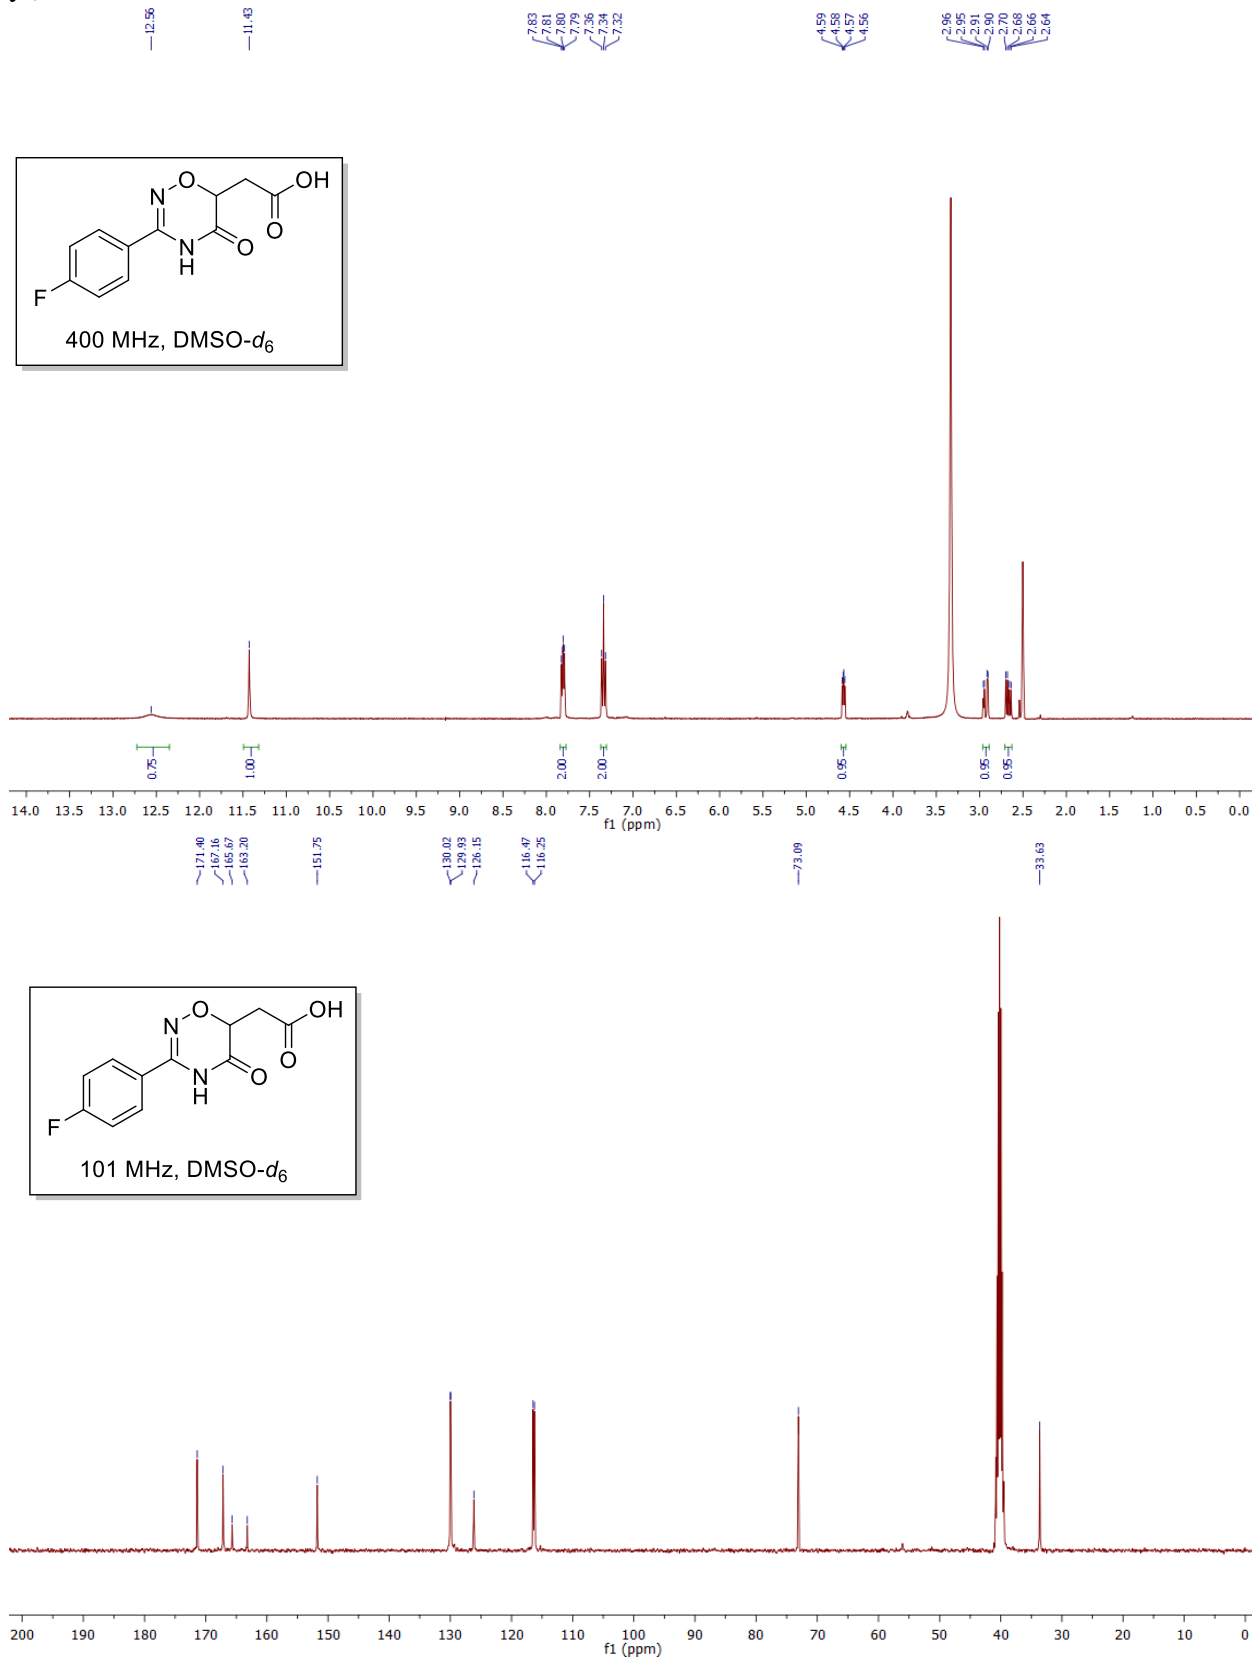

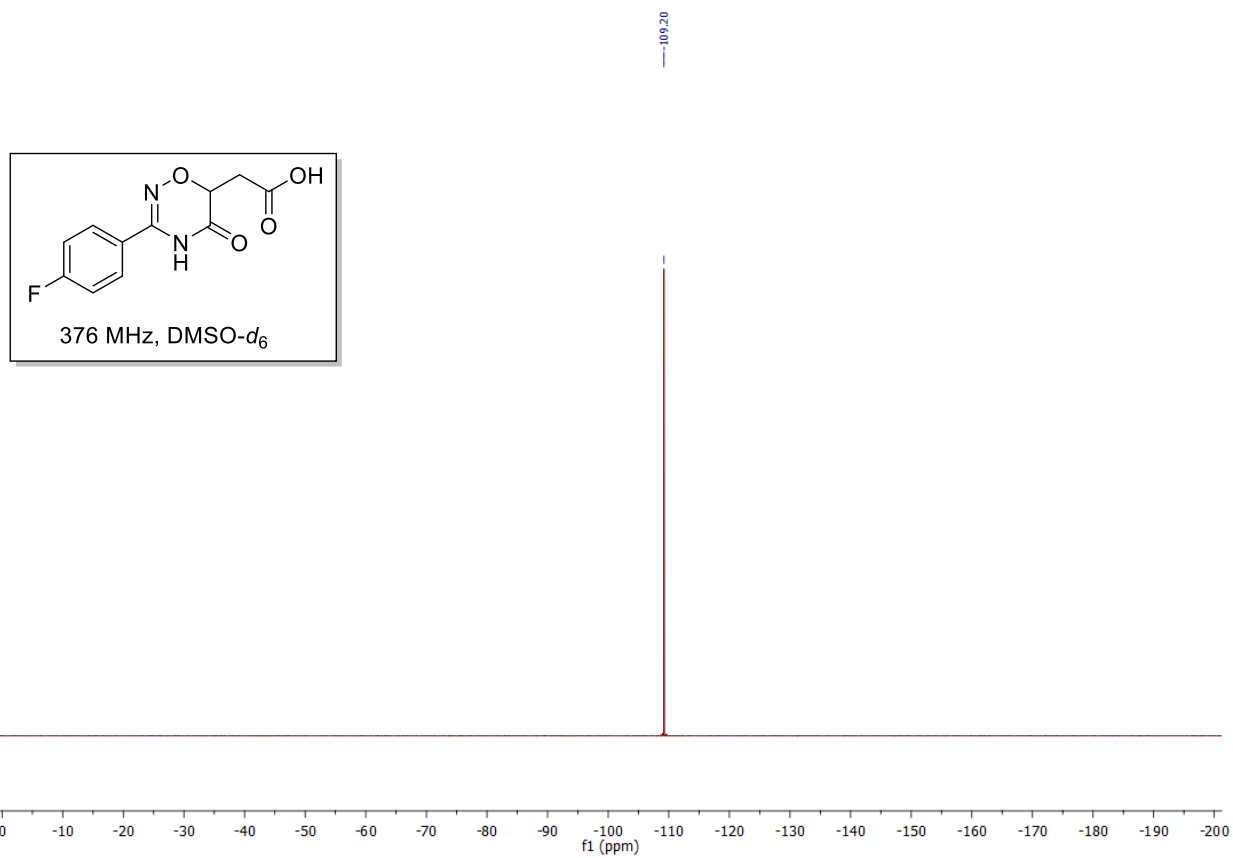

$^1\text{H}$  and  $^{13}\text{C}$  spectra of 2-(3-(4-bromophenyl)-5-oxo-5,6-dihydro-4*H*-1,2,4-oxadiazin-6-yl)acetic acid **3g**

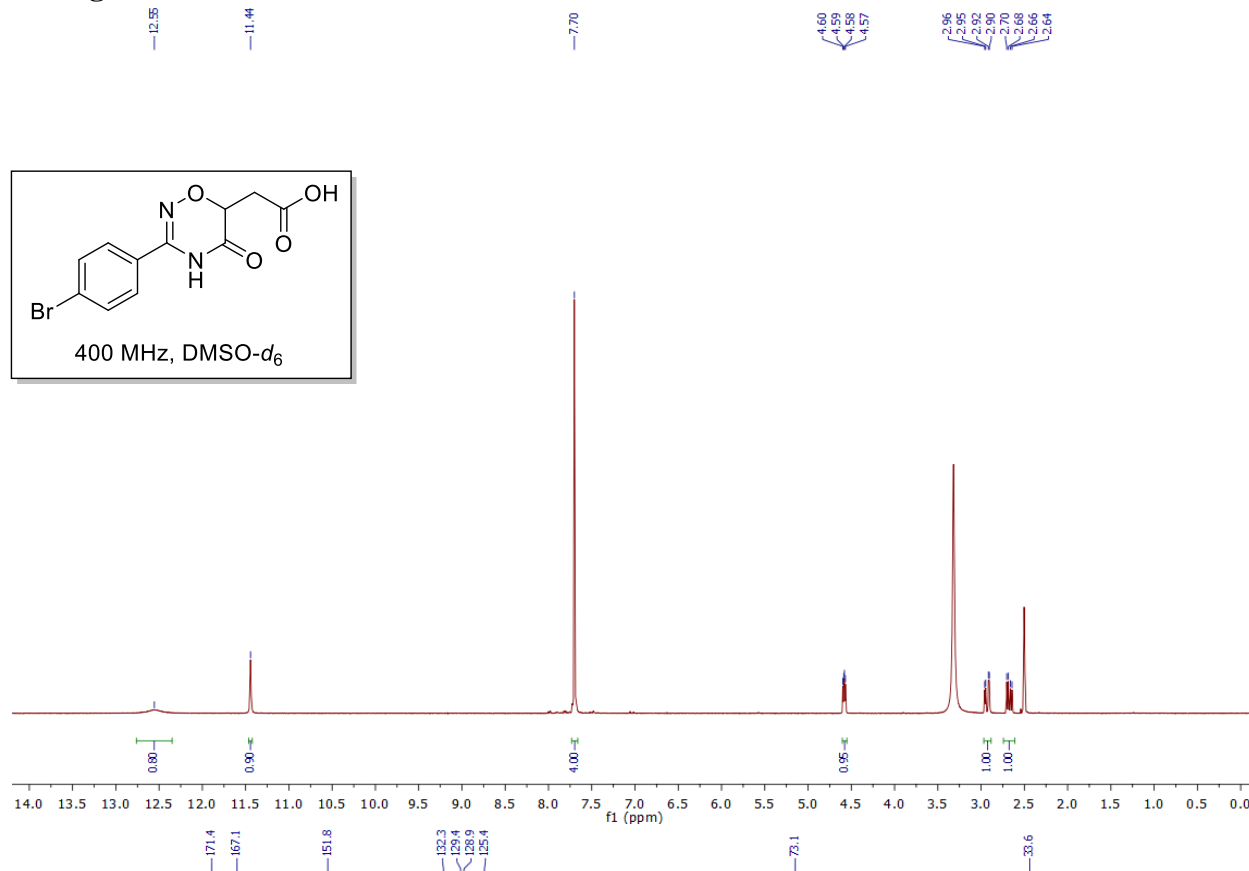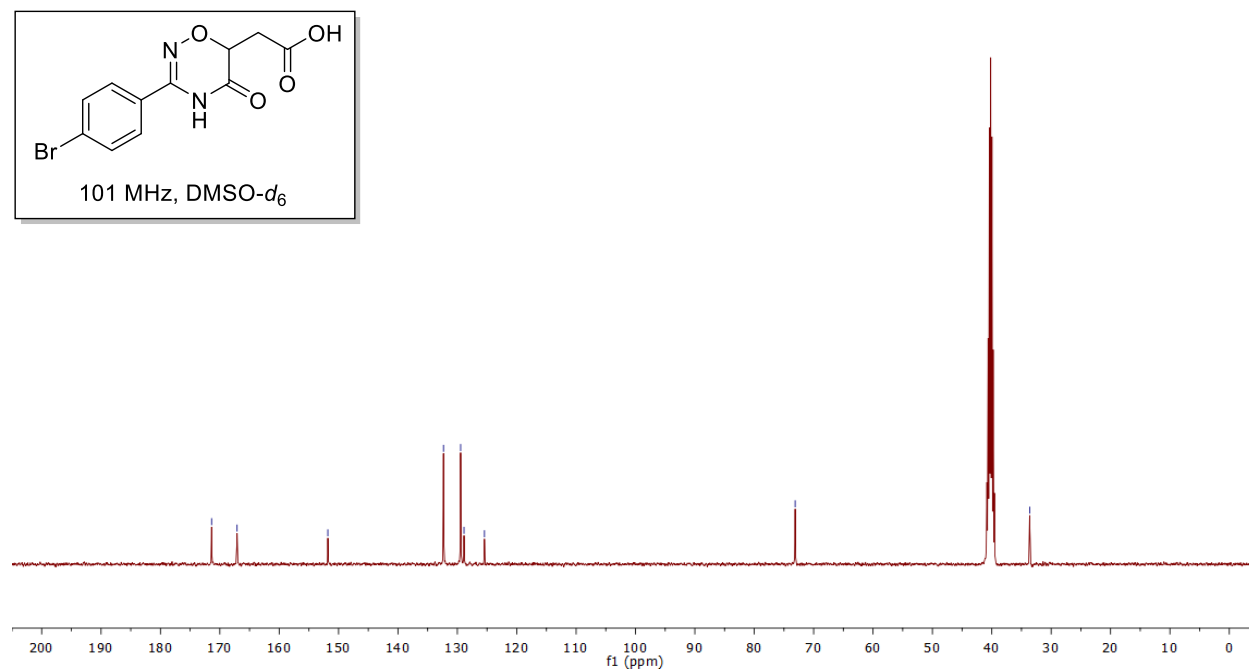

$^1\text{H}$  and  $^{13}\text{C}$  spectra of 2-(3-(4-chlorophenyl)-5-oxo-5,6-dihydro-4*H*-1,2,4-oxadiazin-6-yl)acetic acid **3h**

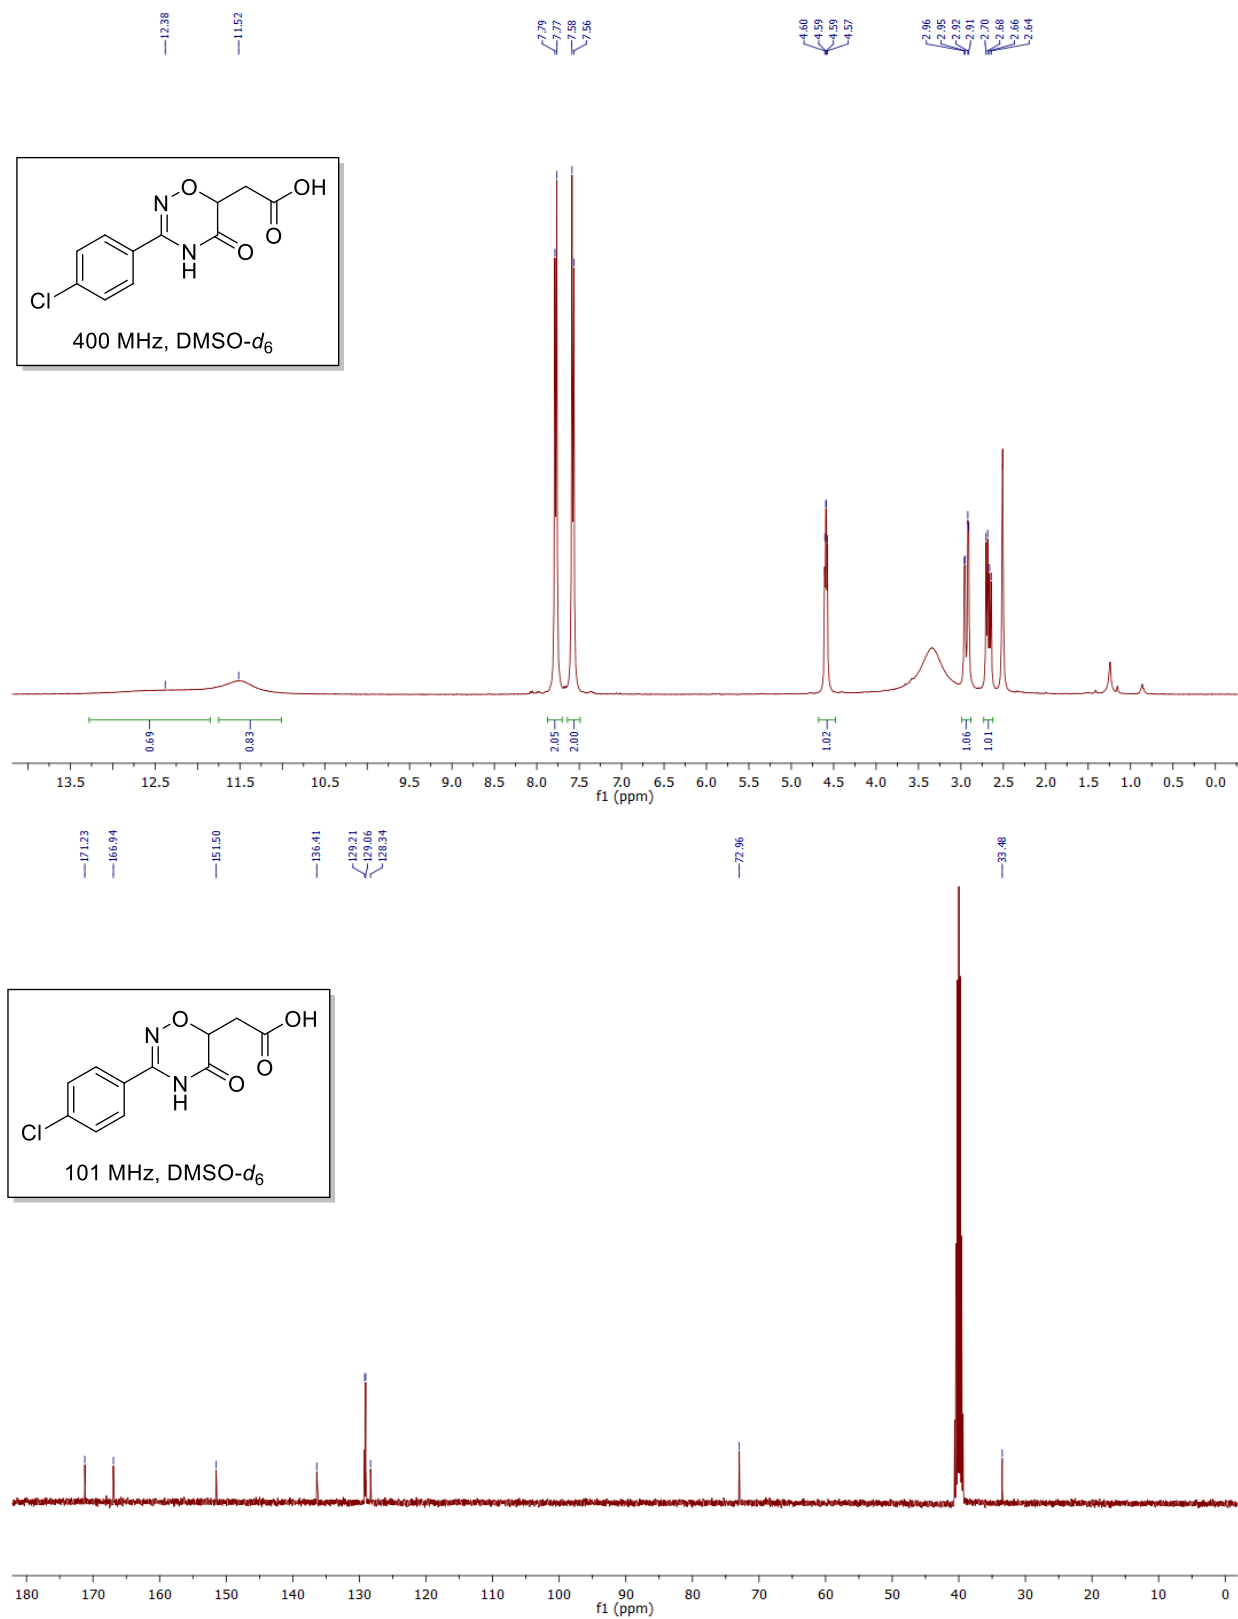

$^1\text{H}$  and  $^{13}\text{C}$  spectra of 2-(5-oxo-3-(4-phenoxyphenyl)-5,6-dihydro-4*H*-1,2,4-oxadiazin-6-yl)acetic acid **3i**

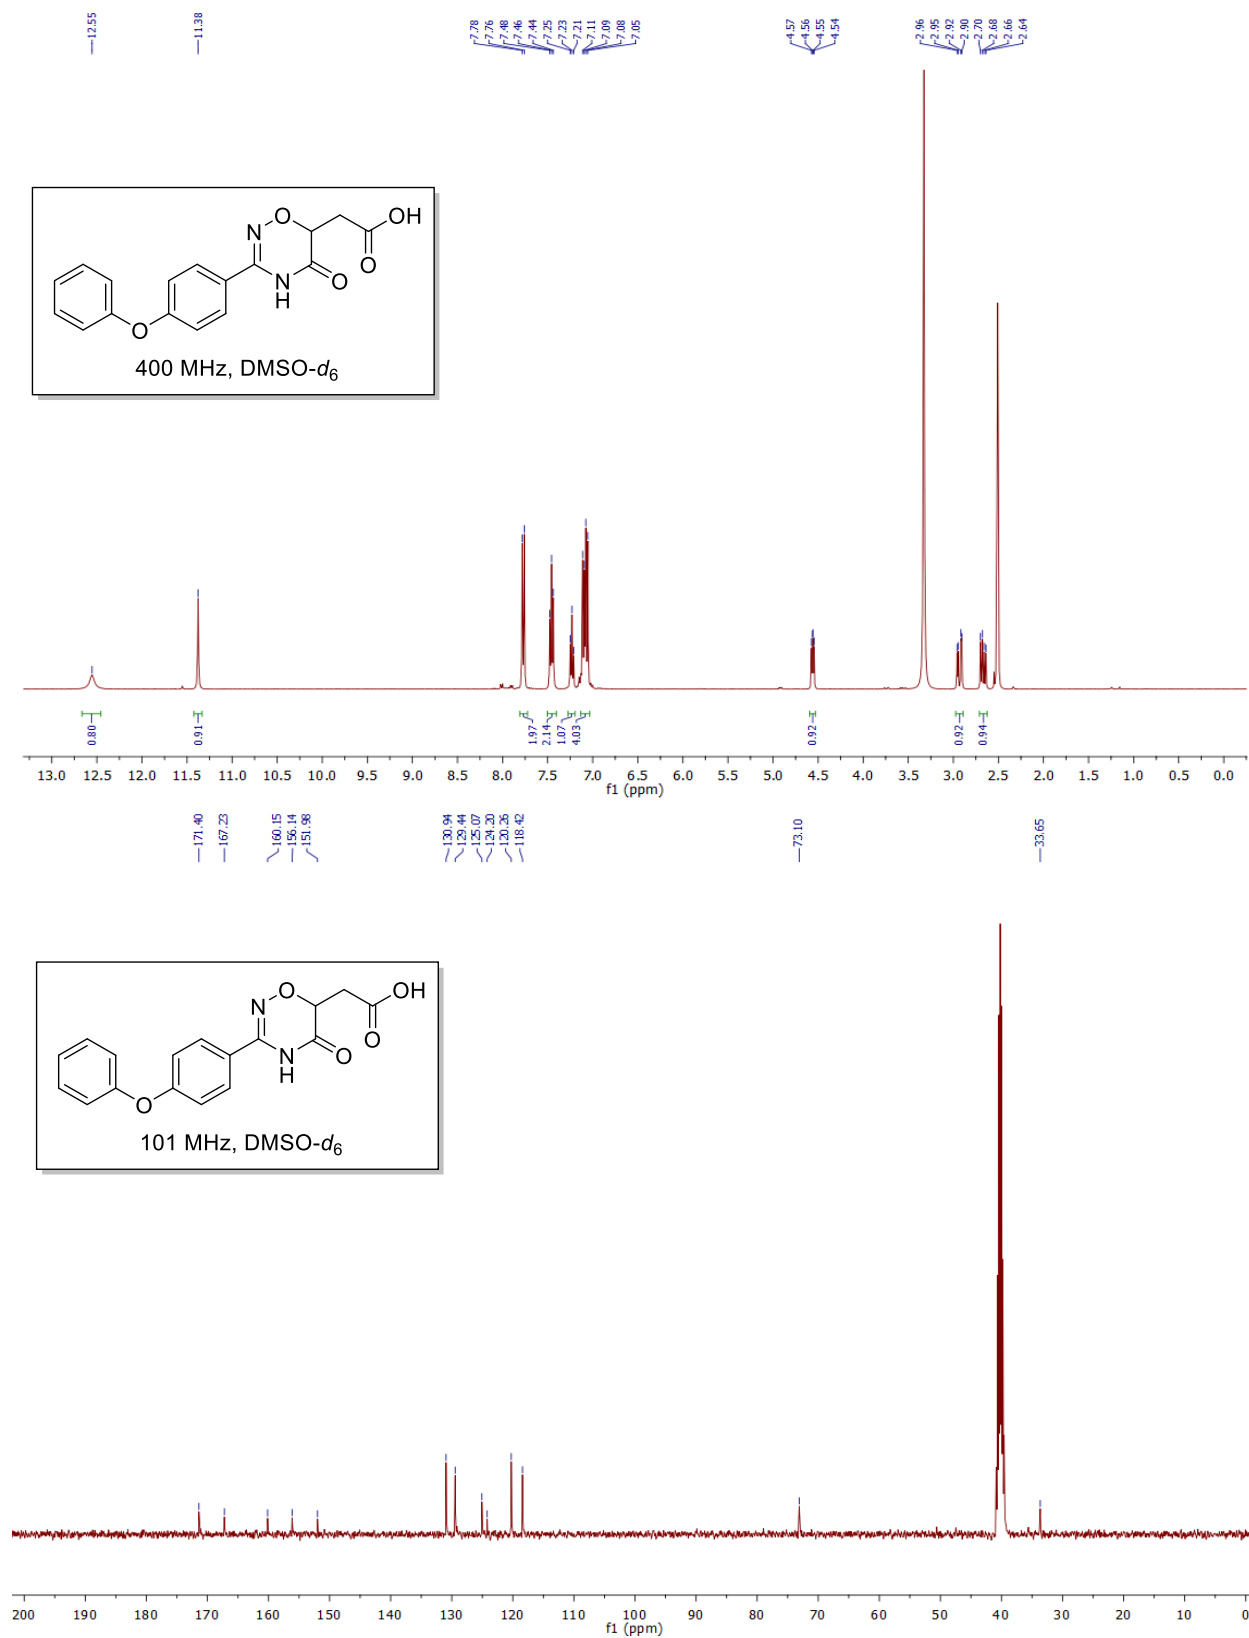

$^1\text{H}$  and  $^{13}\text{C}$  spectra of 2-(5-oxo-3-(2-methylphenyl)-5,6-dihydro-4*H*-1,2,4-oxadiazin-6-yl)acetic acid **3j**

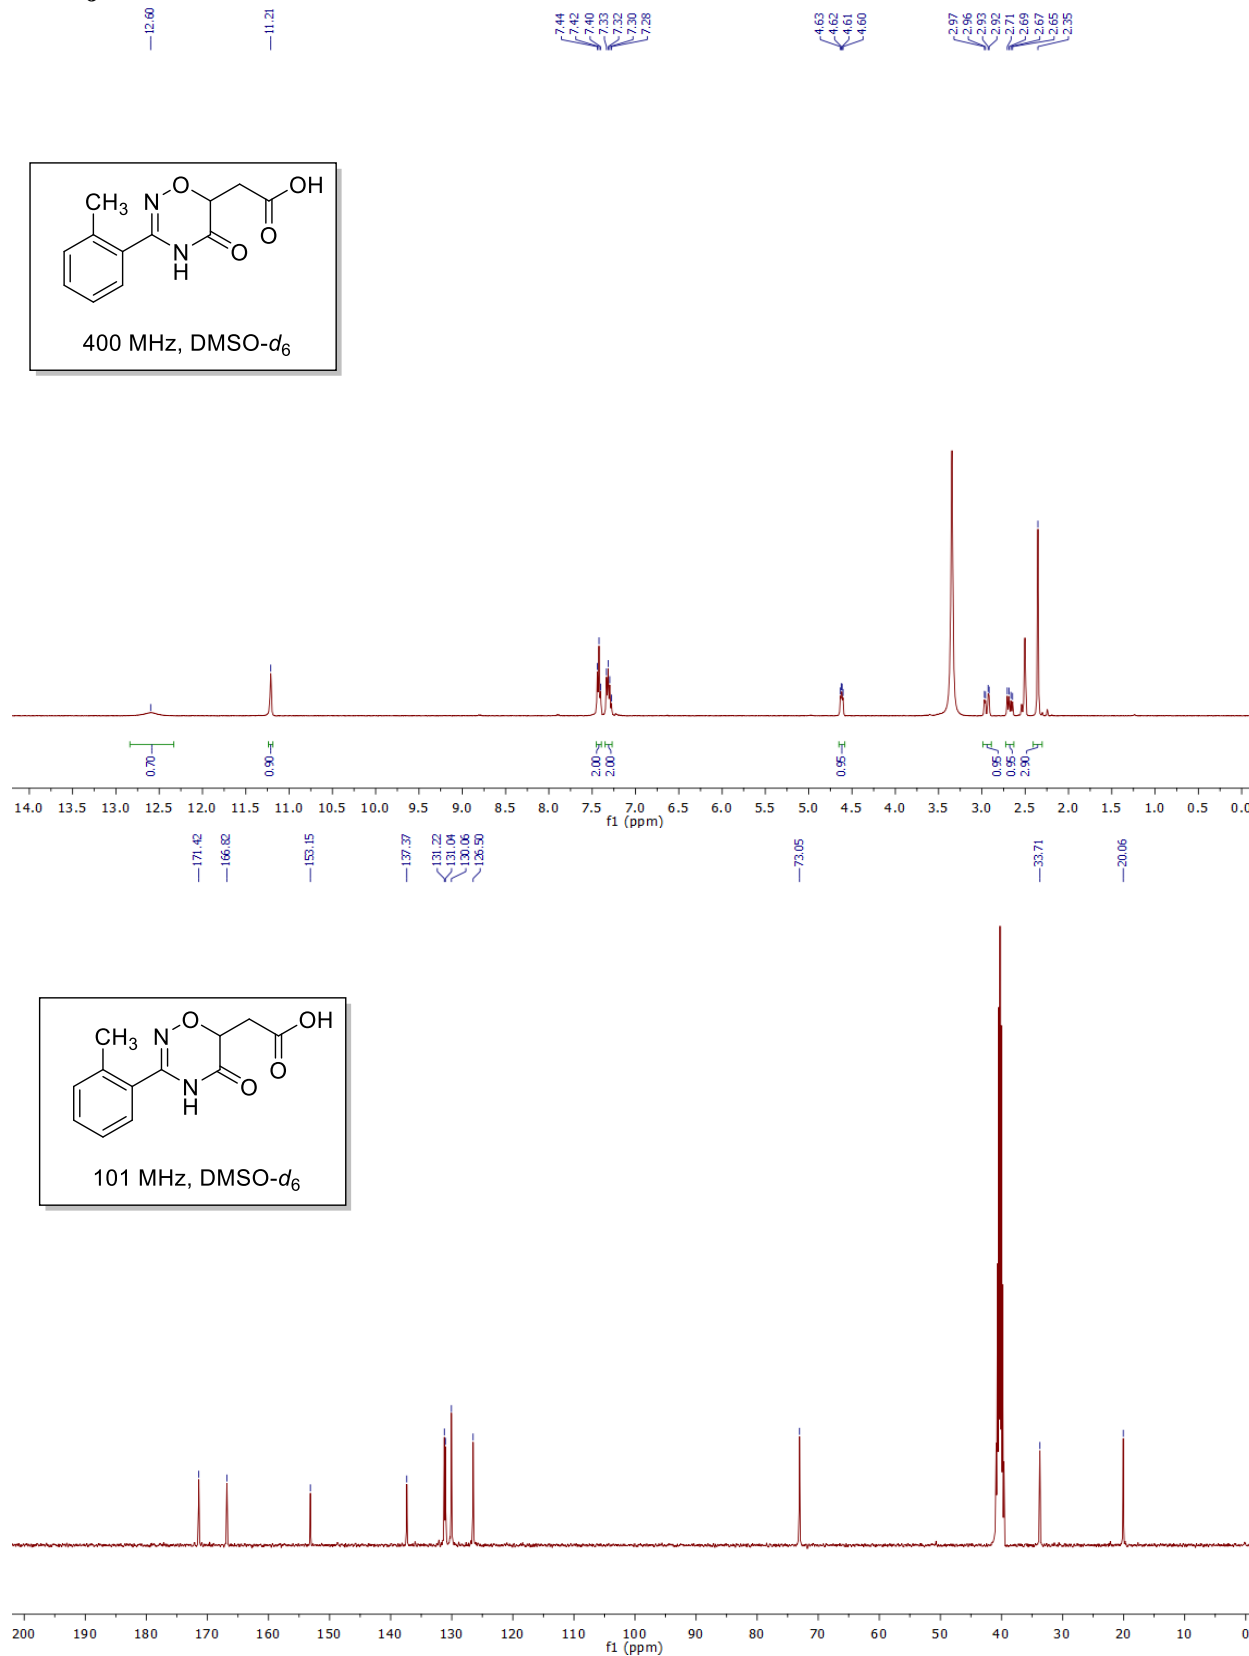

$^1\text{H}$  and  $^{13}\text{C}$  spectra of 2-(3-(2-chlorophenyl)-5-oxo-5,6-dihydro-4*H*-1,2,4-oxadiazin-6-yl)acetic acid **3k**

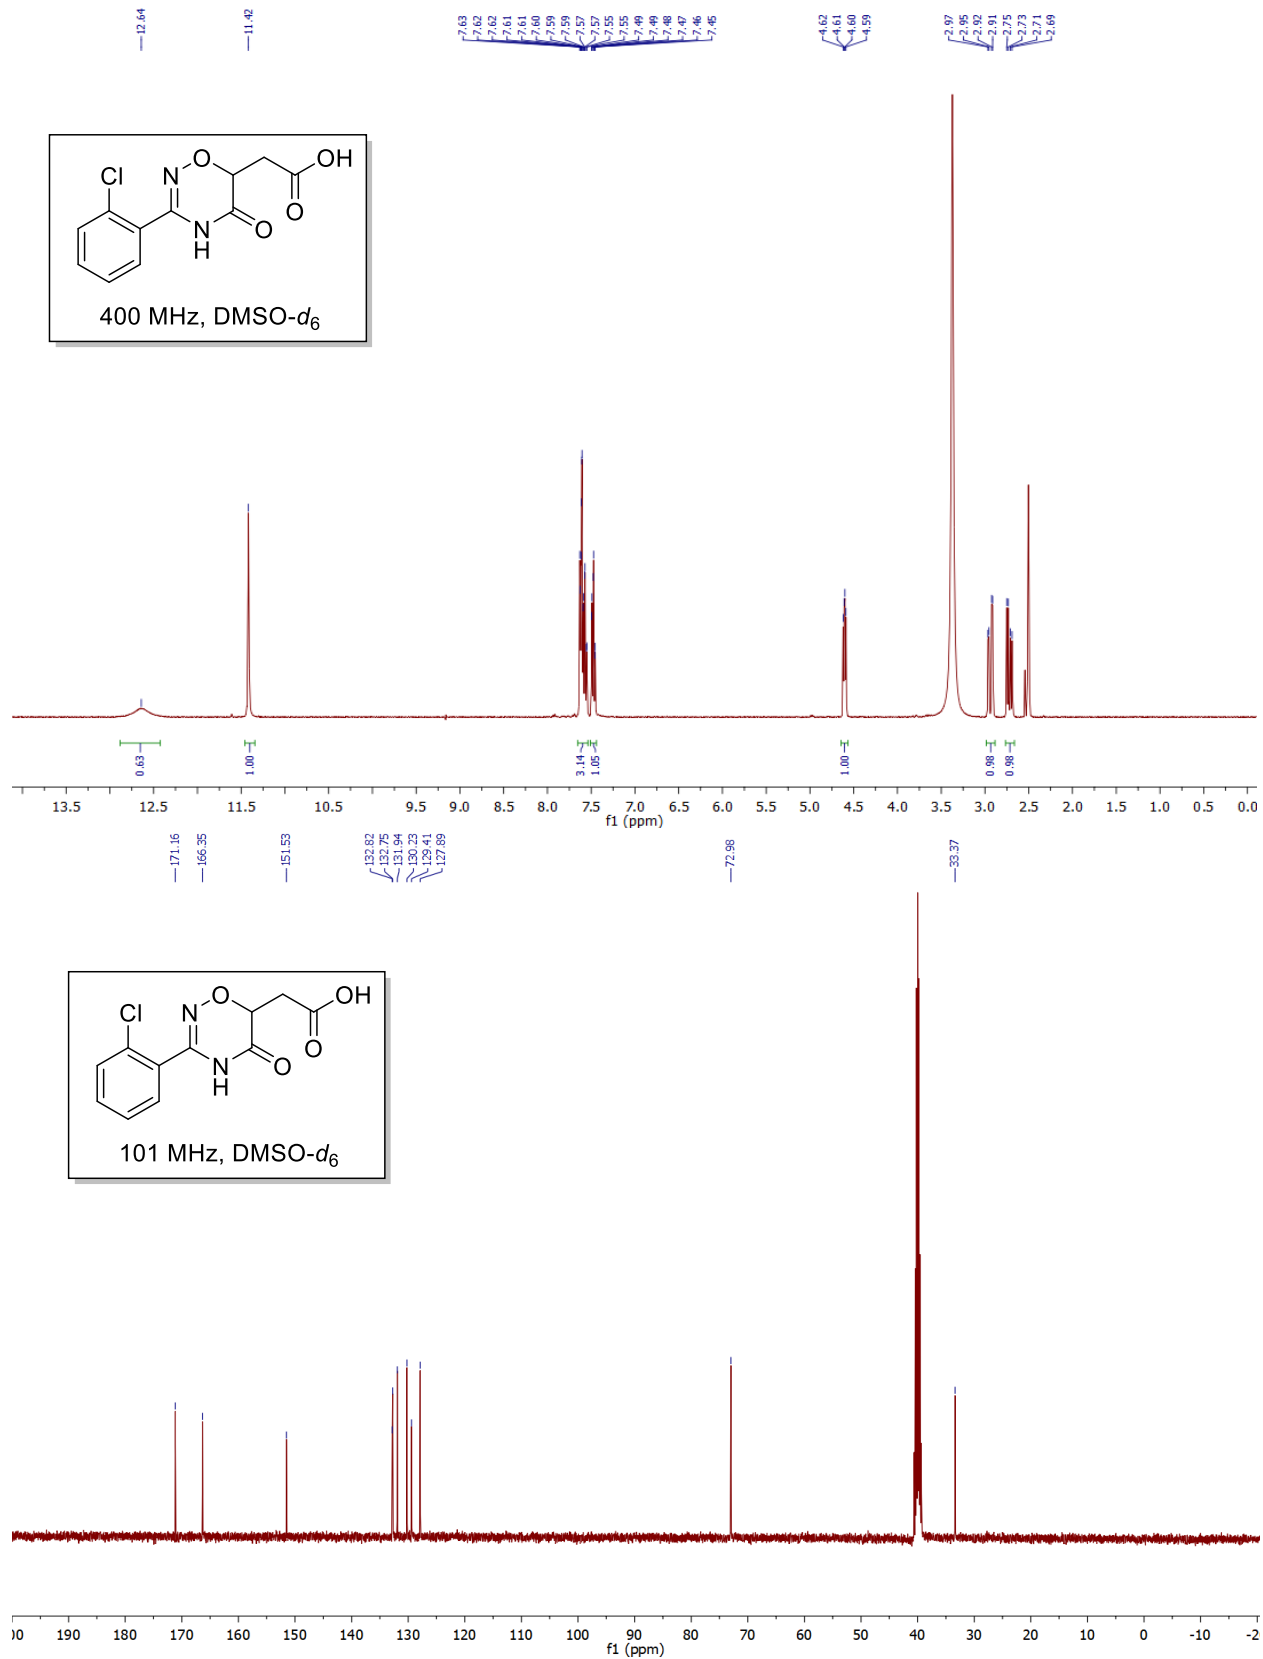

$^1\text{H}$  and  $^{13}\text{C}$  spectra of 2-(3-(3,4-Dichlorophenyl)-5-oxo-5,6-dihydro-4*H*-1,2,4-oxadiazin-6-yl)acetic acid **31**

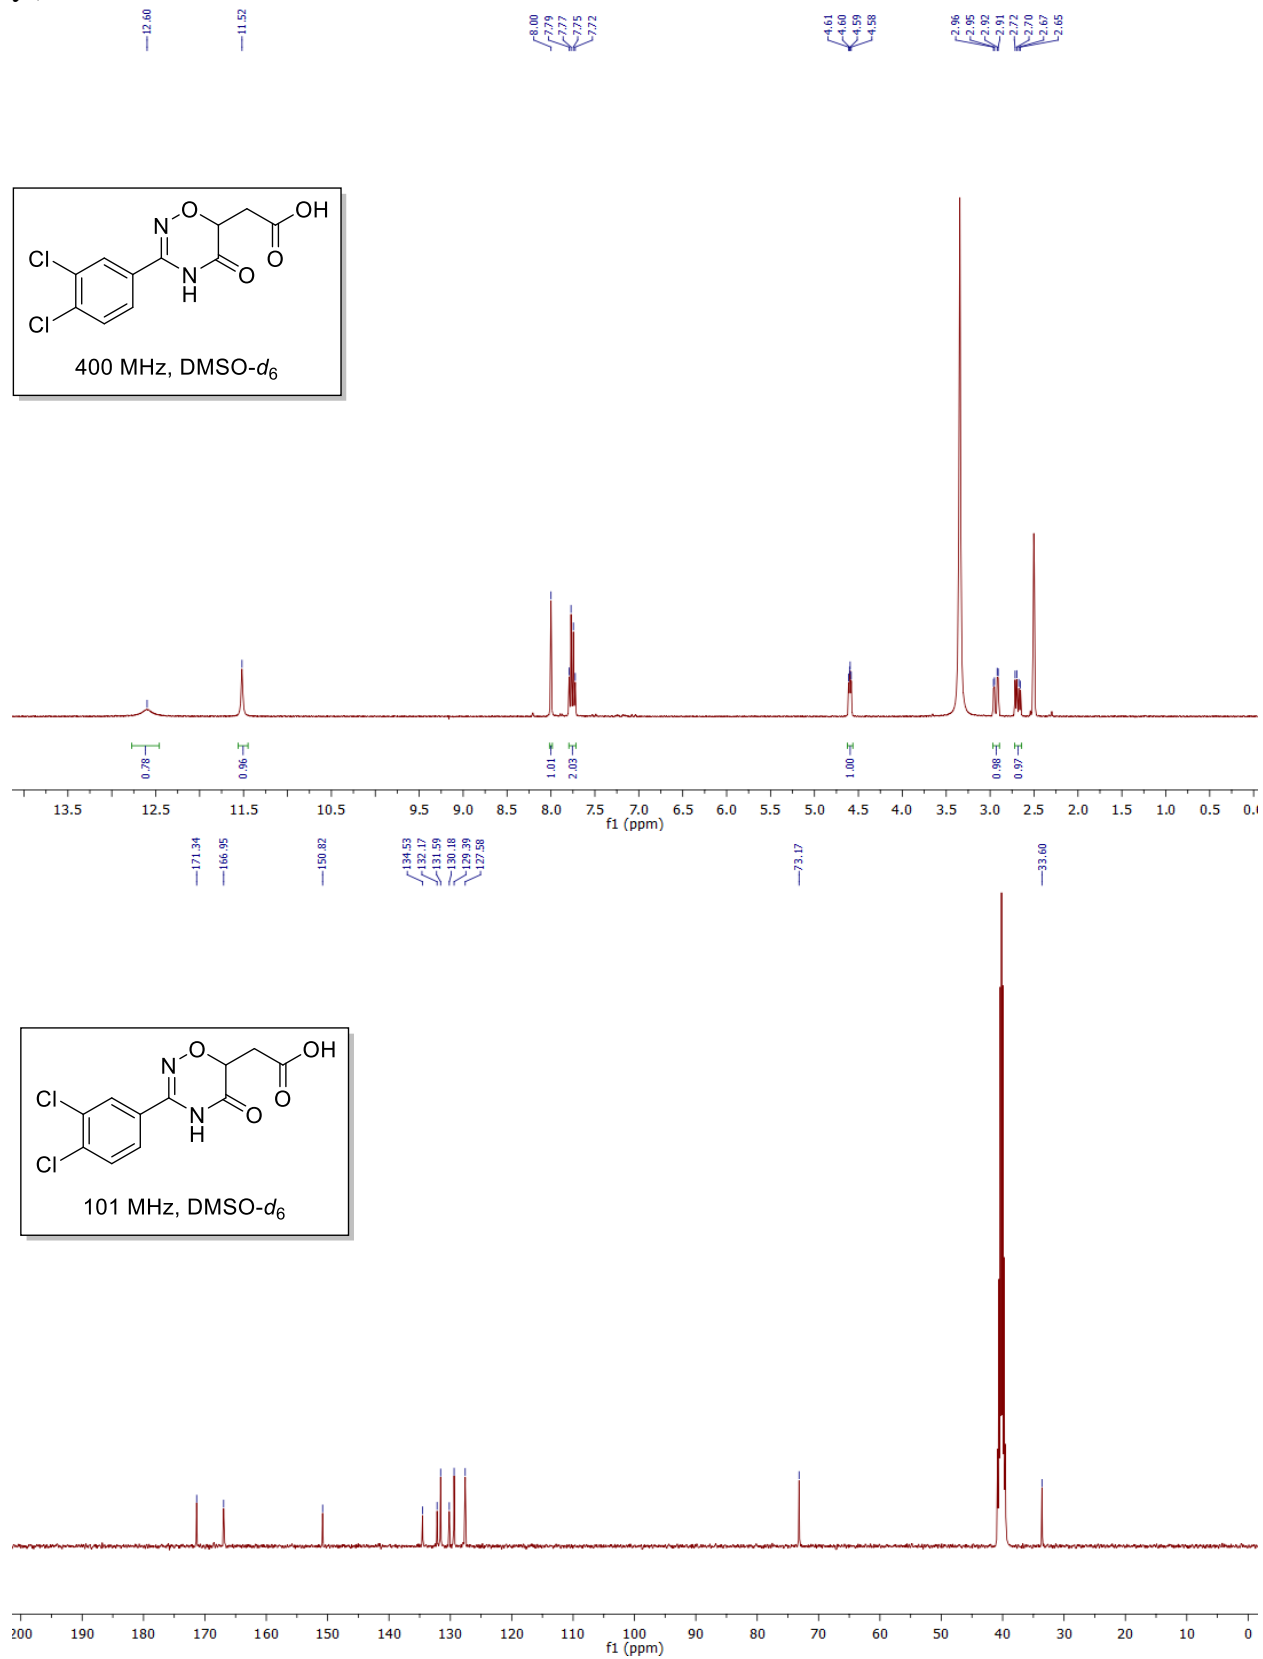



$^1\text{H}$  and  $^{13}\text{C}$  spectra of 2-(3-(3,5-dichlorophenyl)-5-oxo-5,6-dihydro-4H-1,2,4-oxadiazin-6-yl)acetic acid **3m**

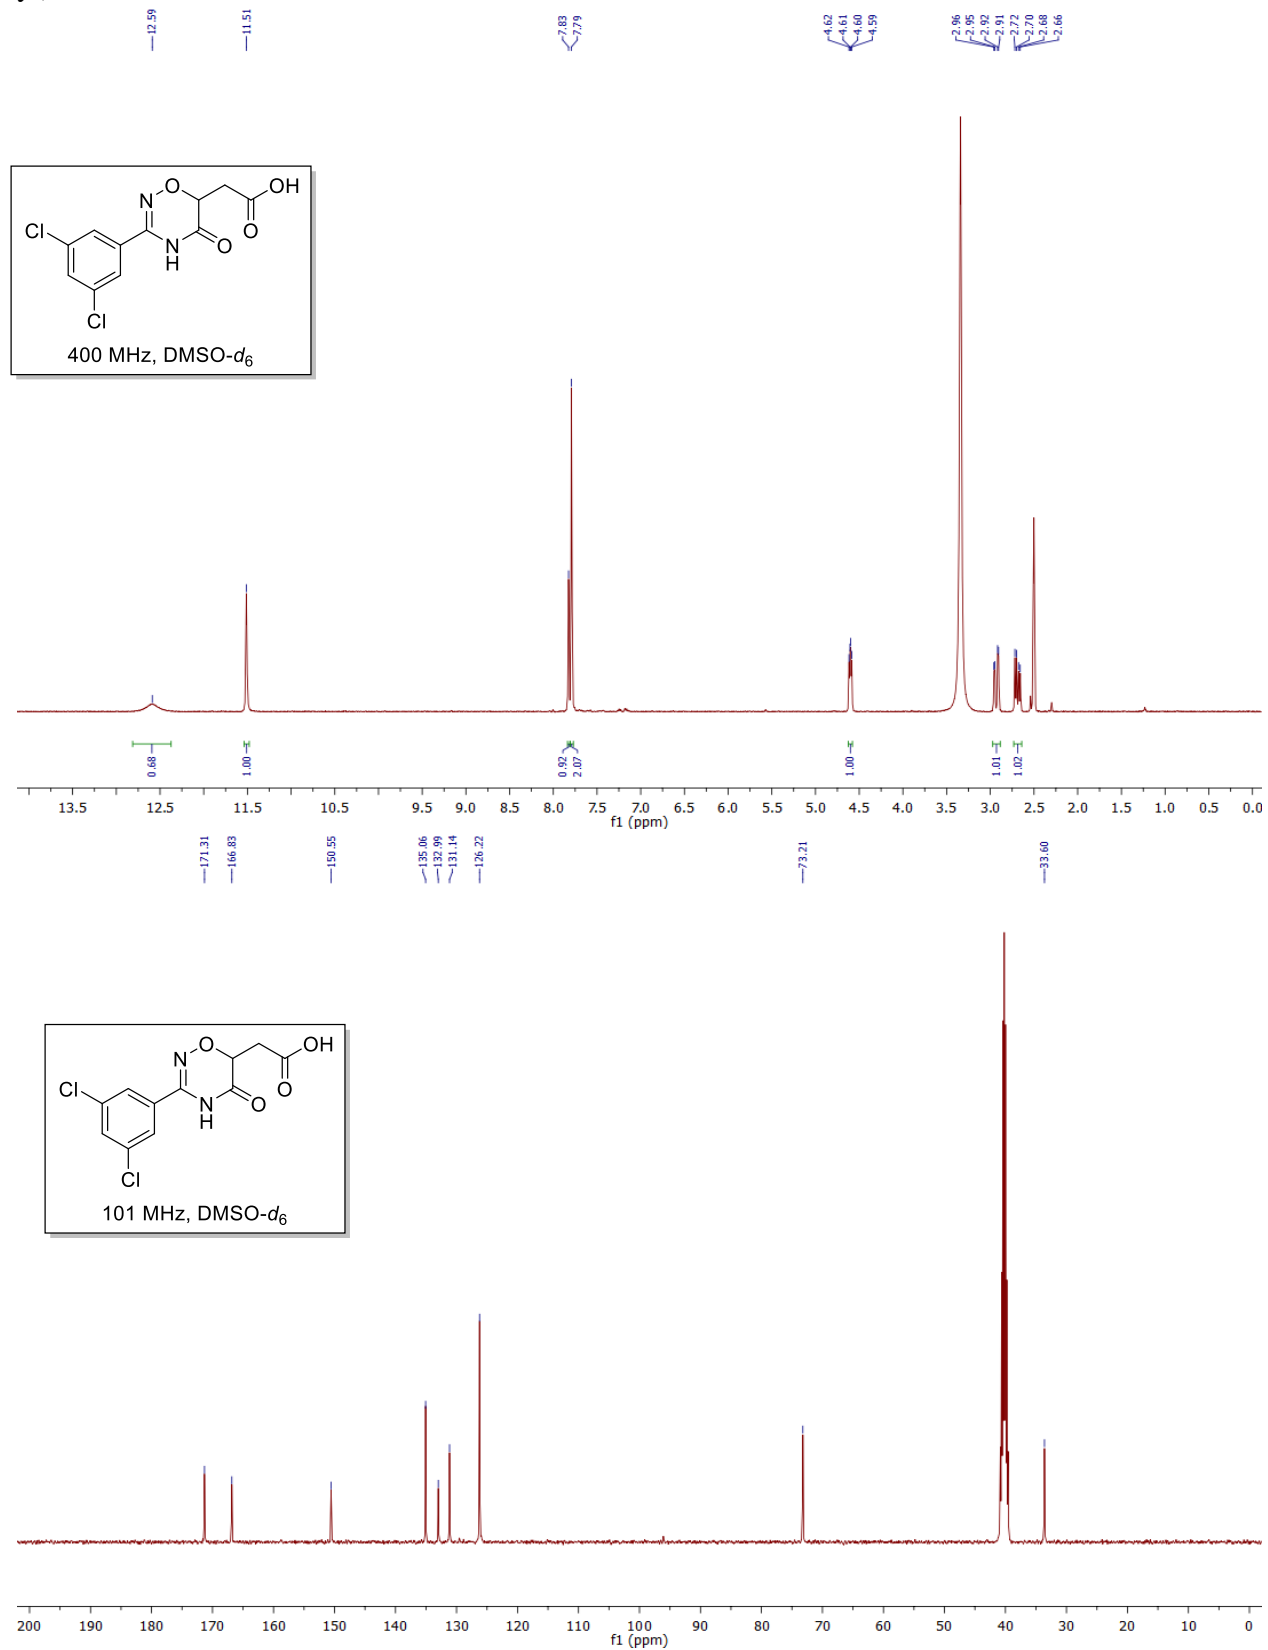

$^1\text{H}$  and  $^{13}\text{C}$  spectra of 2-(3-(5-methylthiophen-2-yl)-5-oxo-5,6-dihydro-4*H*-1,2,4-oxadiazin-6-yl)acetic acid **3n**

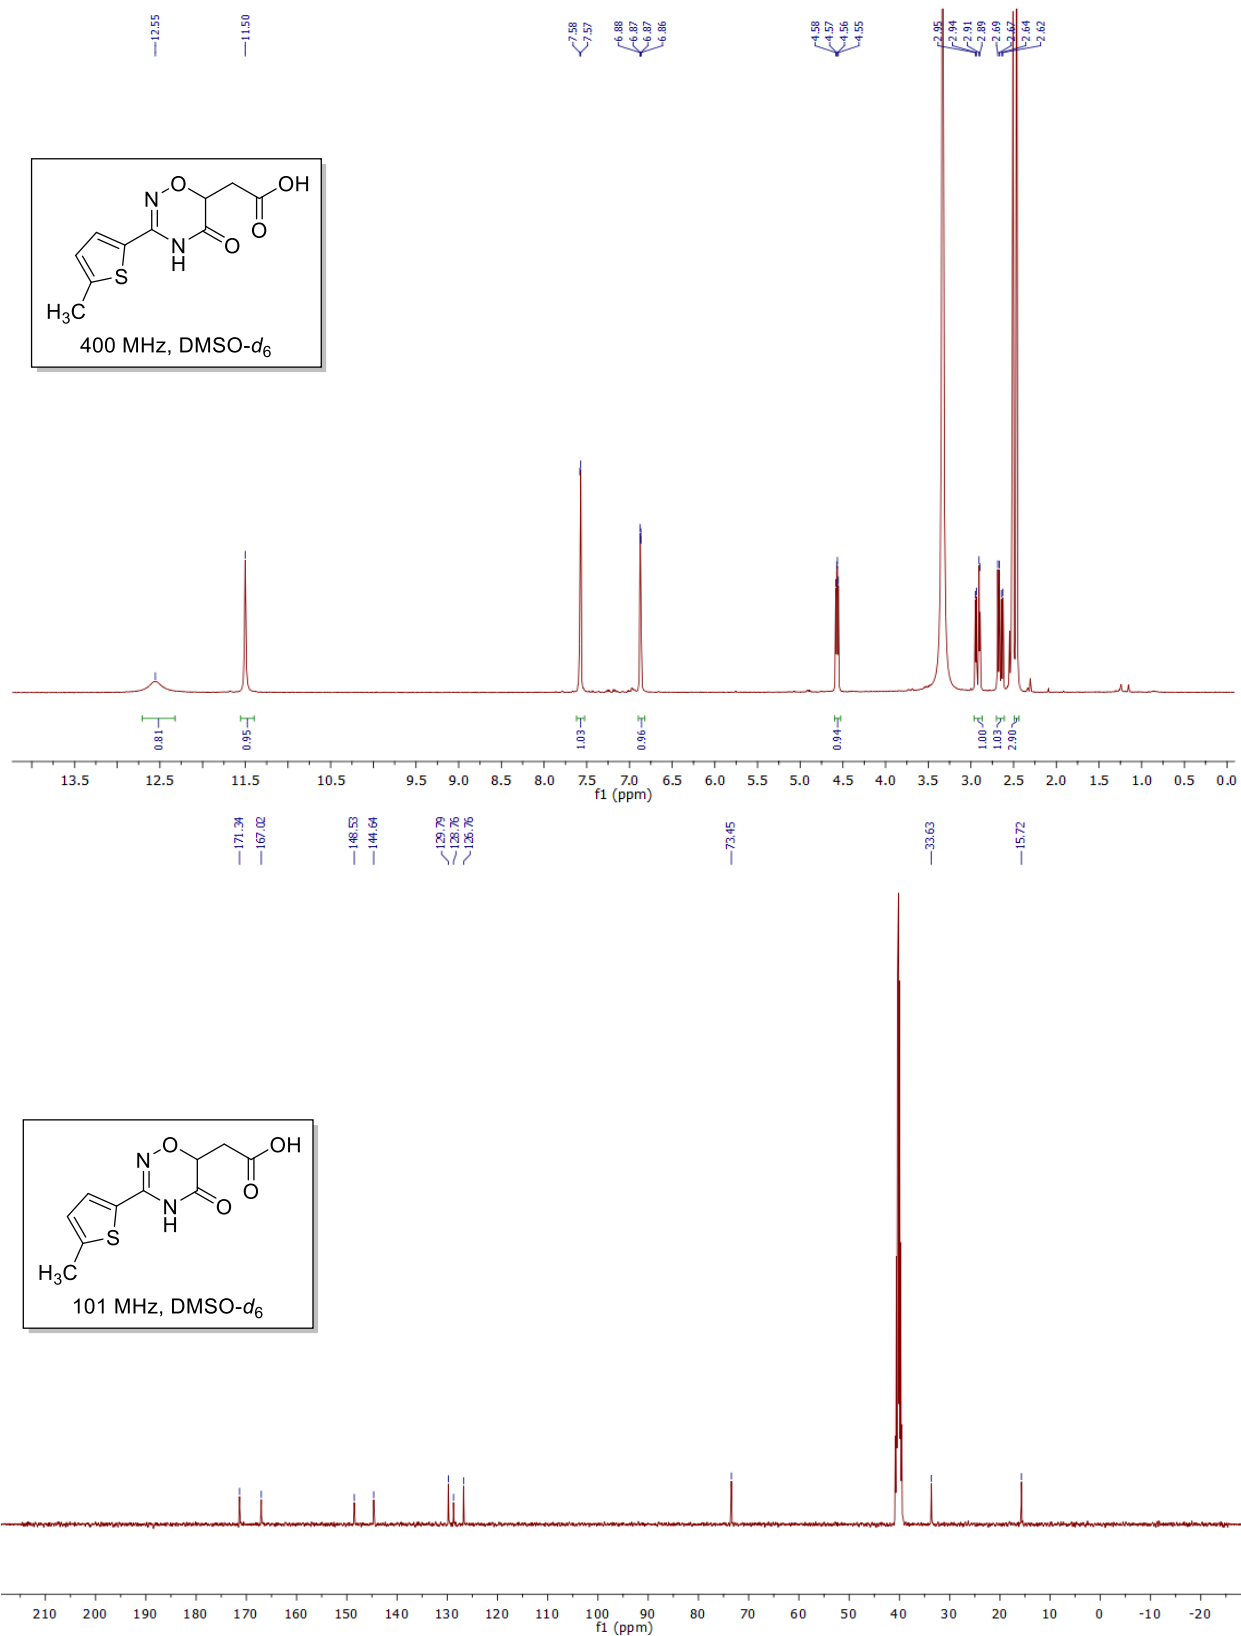

$^1\text{H}$  and  $^{13}\text{C}$  spectra of methyl 2-(3-(4-methylphenyl)-5-oxo-5,6-dihydro-4*H*-1,2,4-oxadiazin-6-yl)acetate **4a**

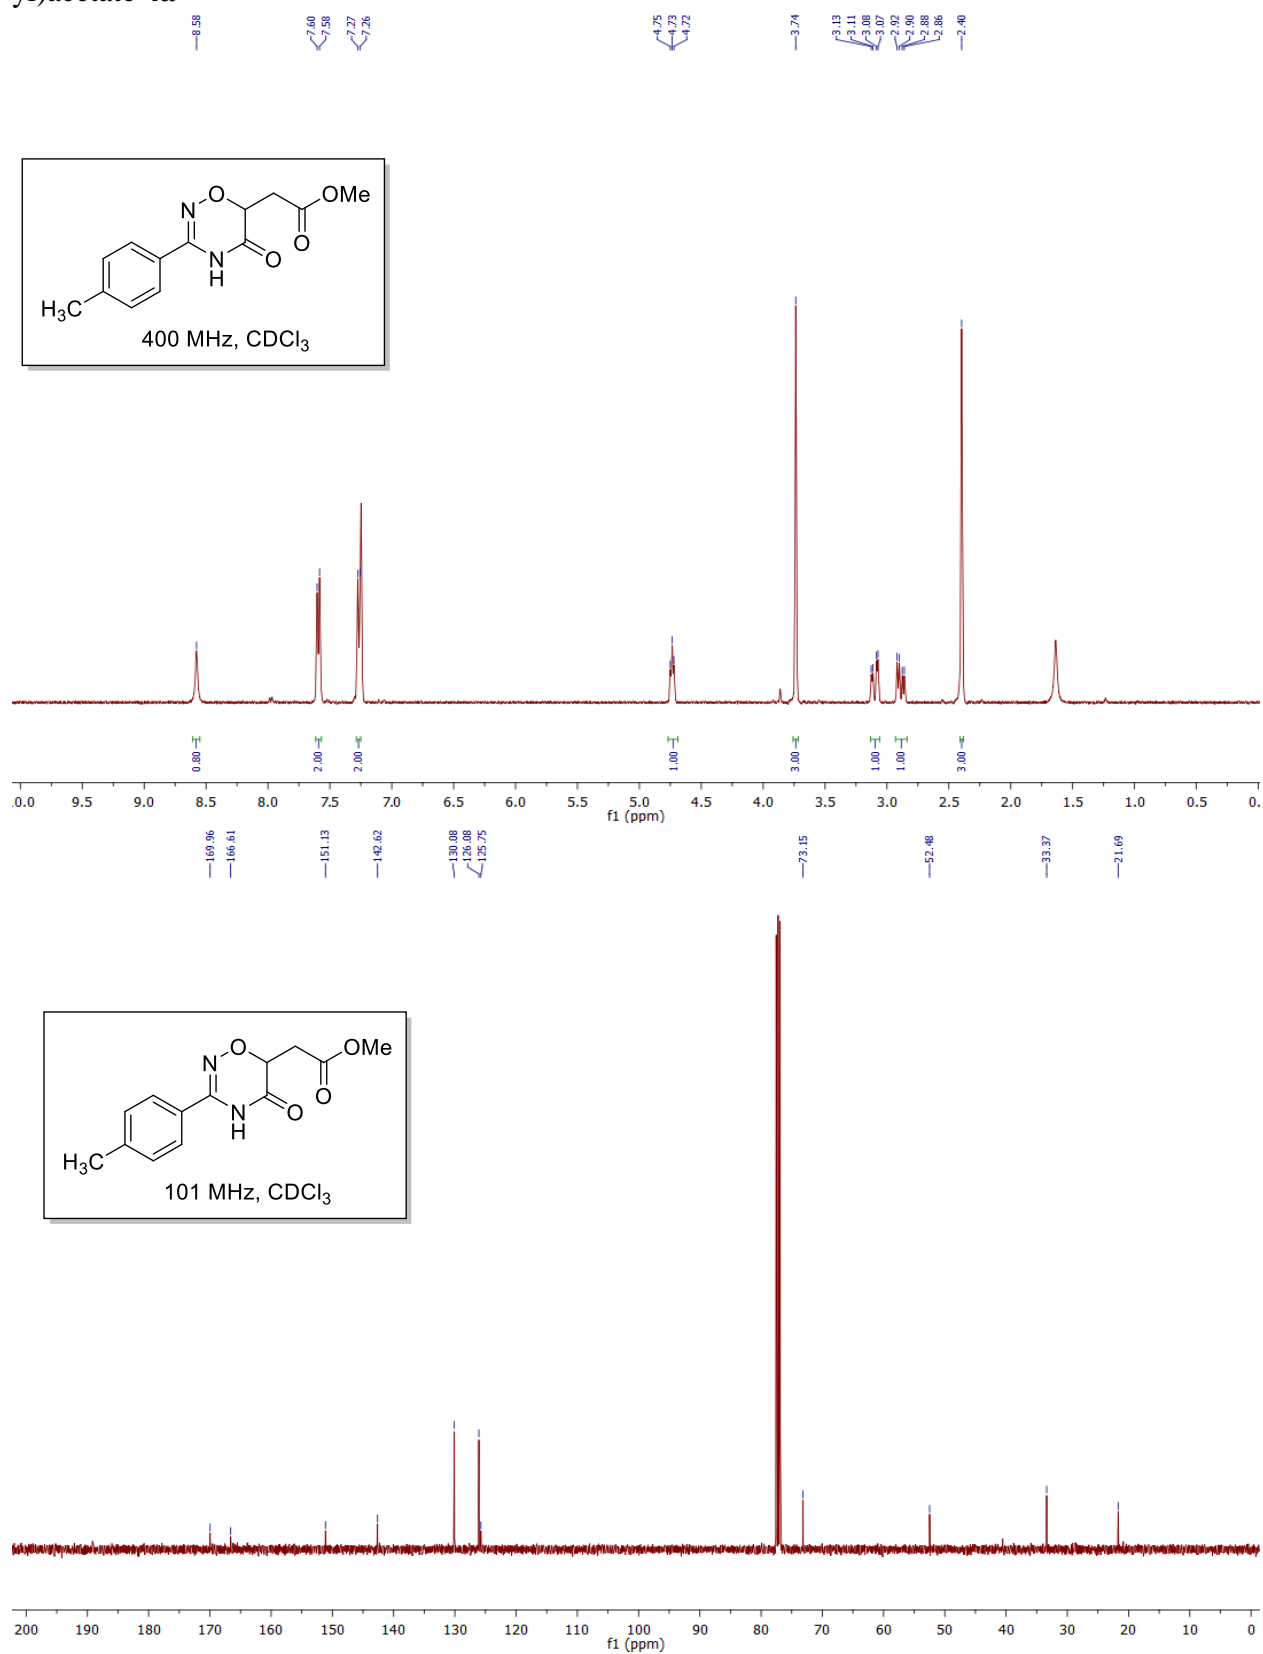

$^1\text{H}$  and  $^{13}\text{C}$  spectra of methyl 2-(5-oxo-3-phenyl-5,6-dihydro-4*H*-1,2,4-oxadiazin-6-yl)acetate **4b**

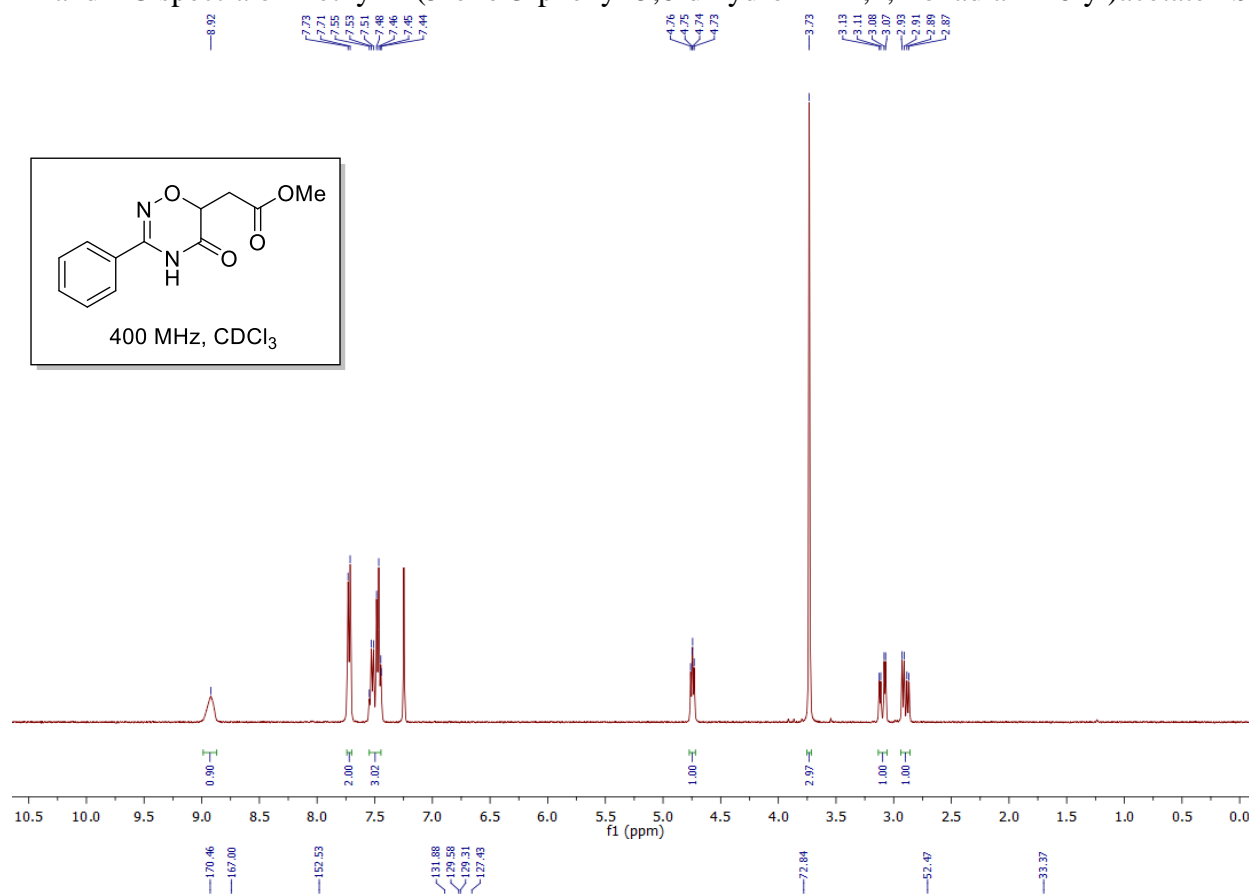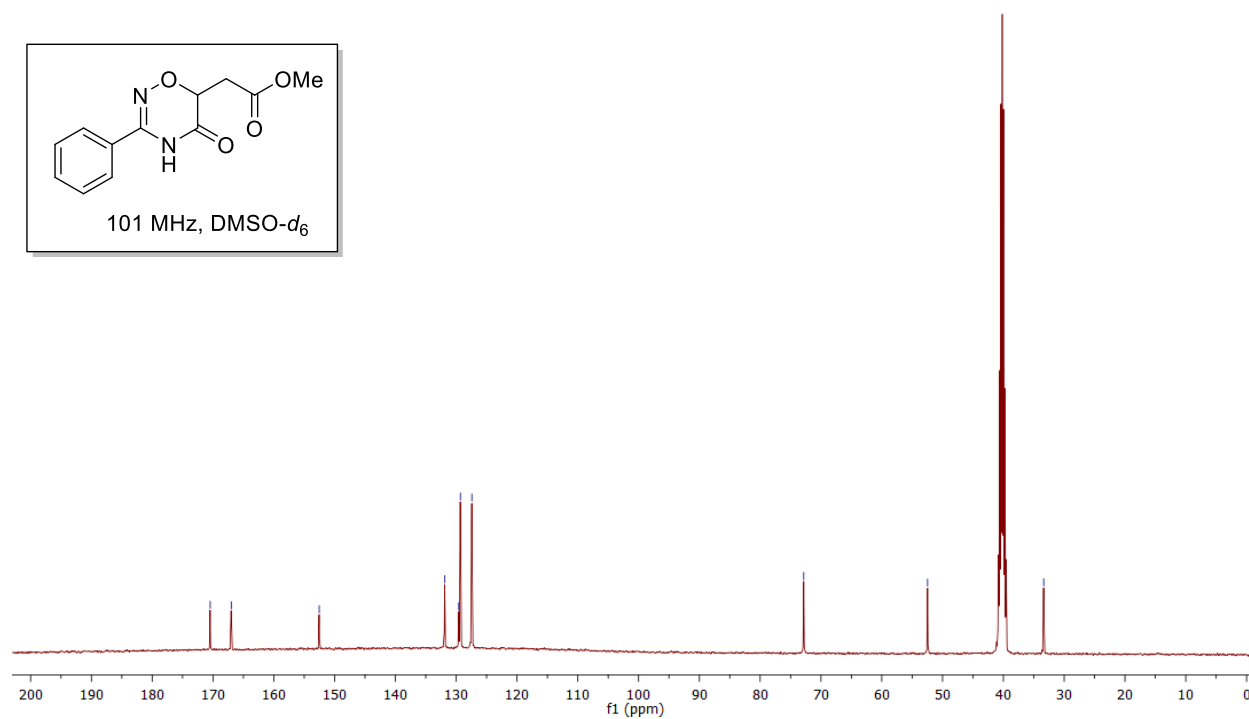

$^1\text{H}$  and  $^{13}\text{C}$  spectra of methyl 2-(3-(4-methoxyphenyl)-5-oxo-5,6-dihydro-4*H*-1,2,4-oxadiazin-6-yl)acetate **4c**

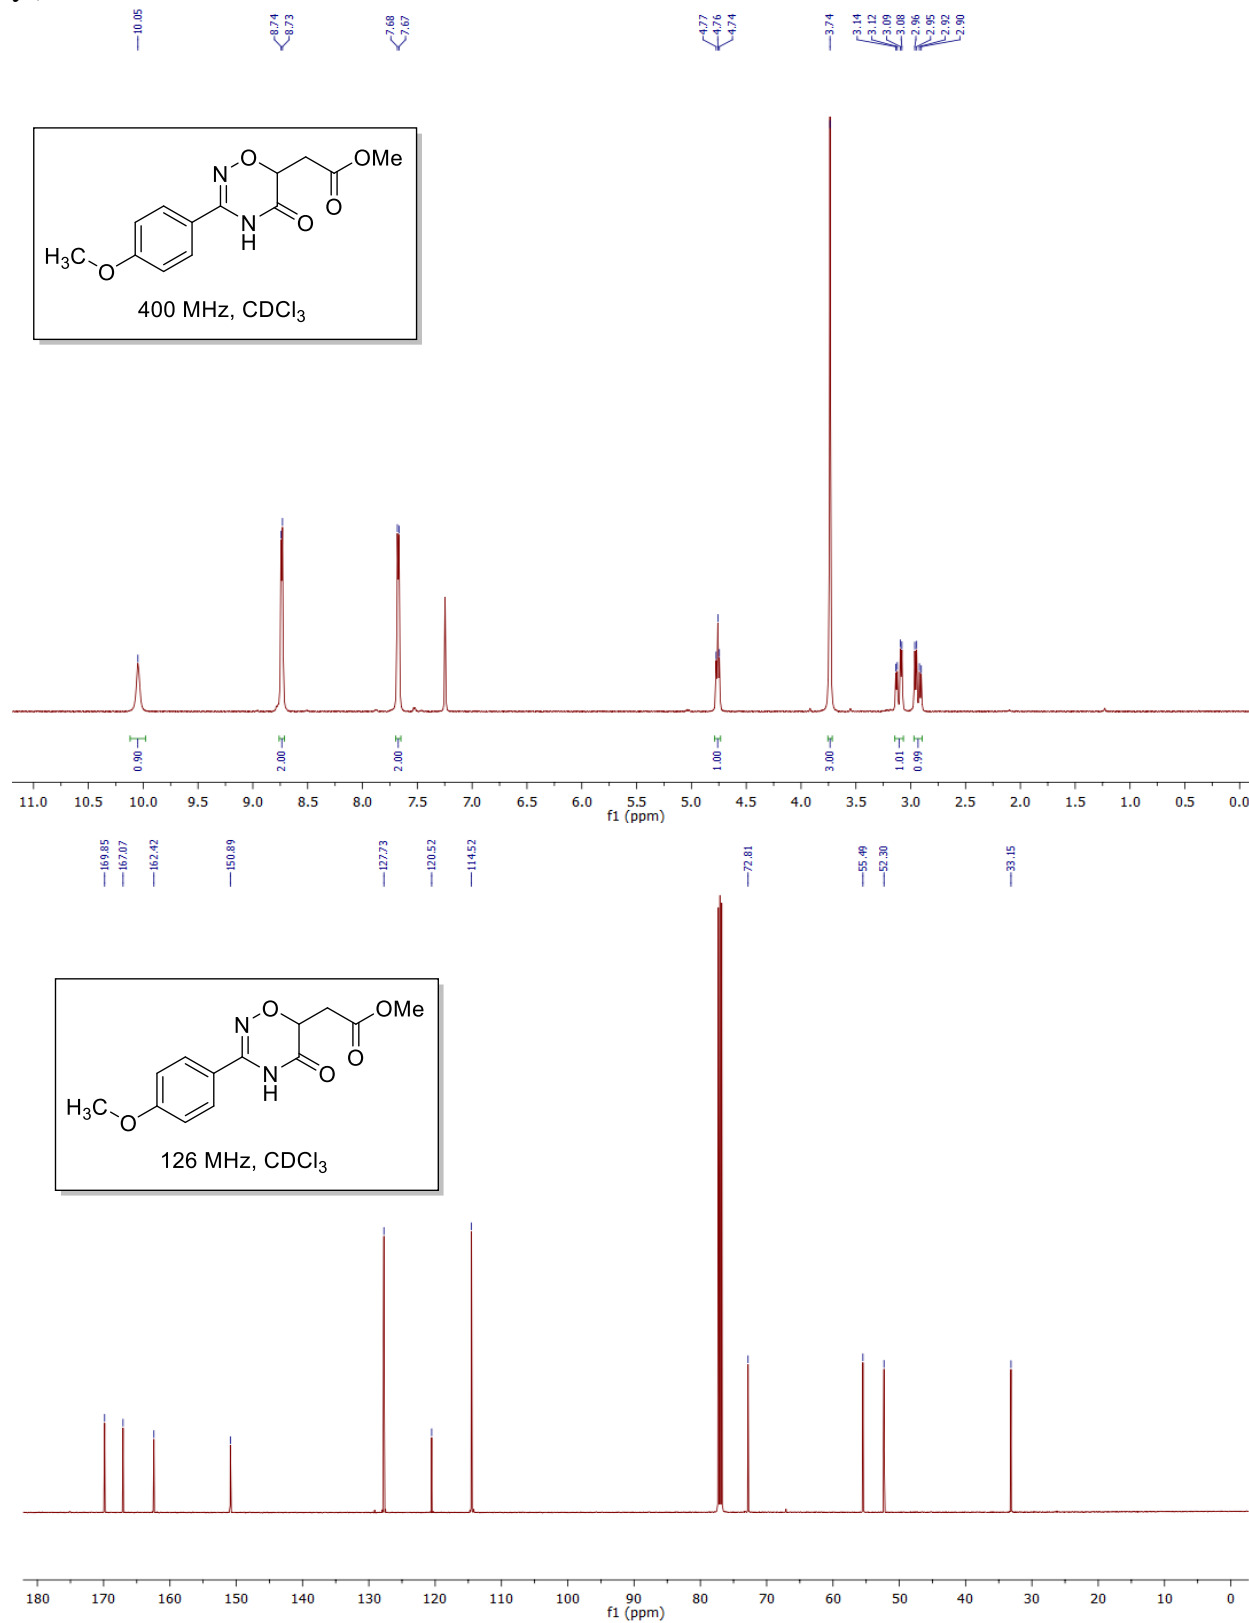

$^1\text{H}$  and  $^{13}\text{C}$  spectra of methyl 2-(3-(4-nitrophenyl)-5-oxo-5,6-dihydro-4H-1,2,4-oxadiazin-6-yl)acetate **4d**

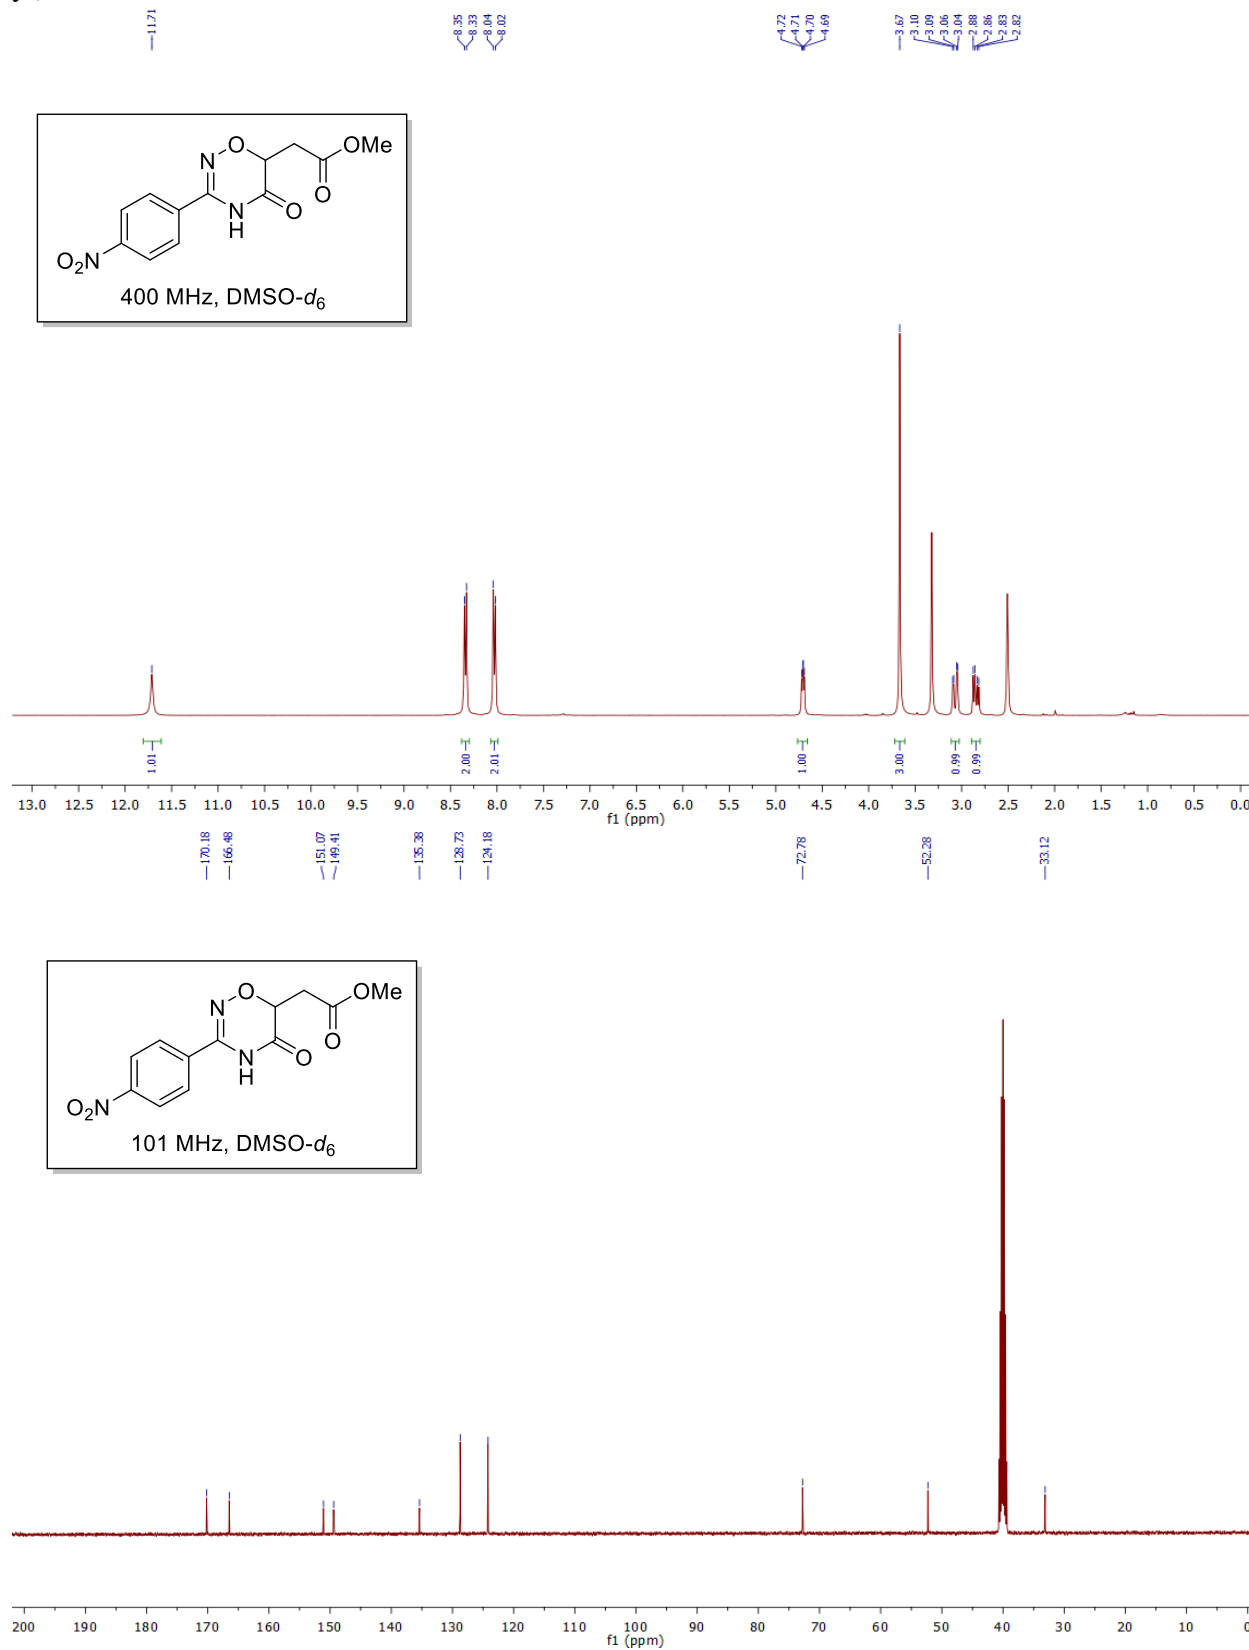

$^1\text{H}$ ,  $^{13}\text{C}$  and  $^{19}\text{F}$  spectra of methyl 2-(5-oxo-3-(4-(trifluoromethyl)phenyl)-5,6-dihydro-4*H*-1,2,4-oxadiazin-6-yl)acetate **4e**

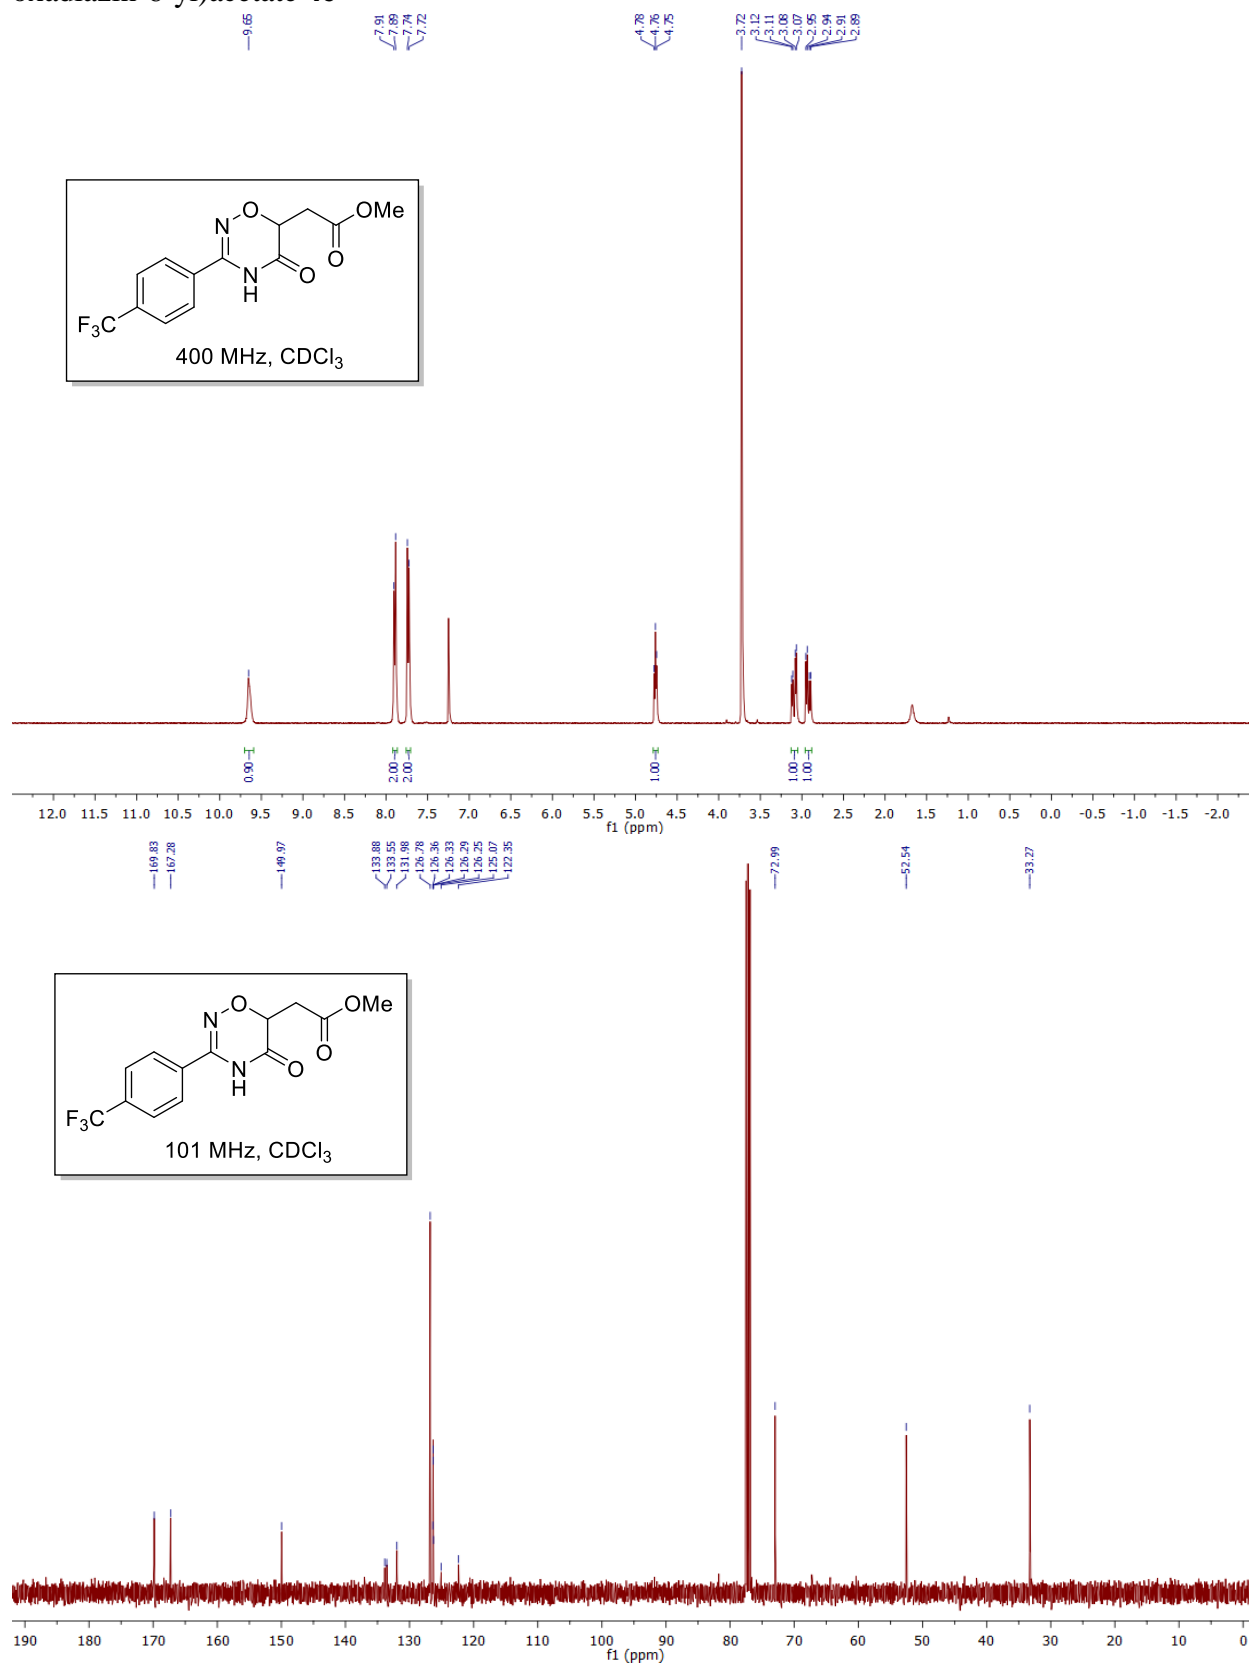

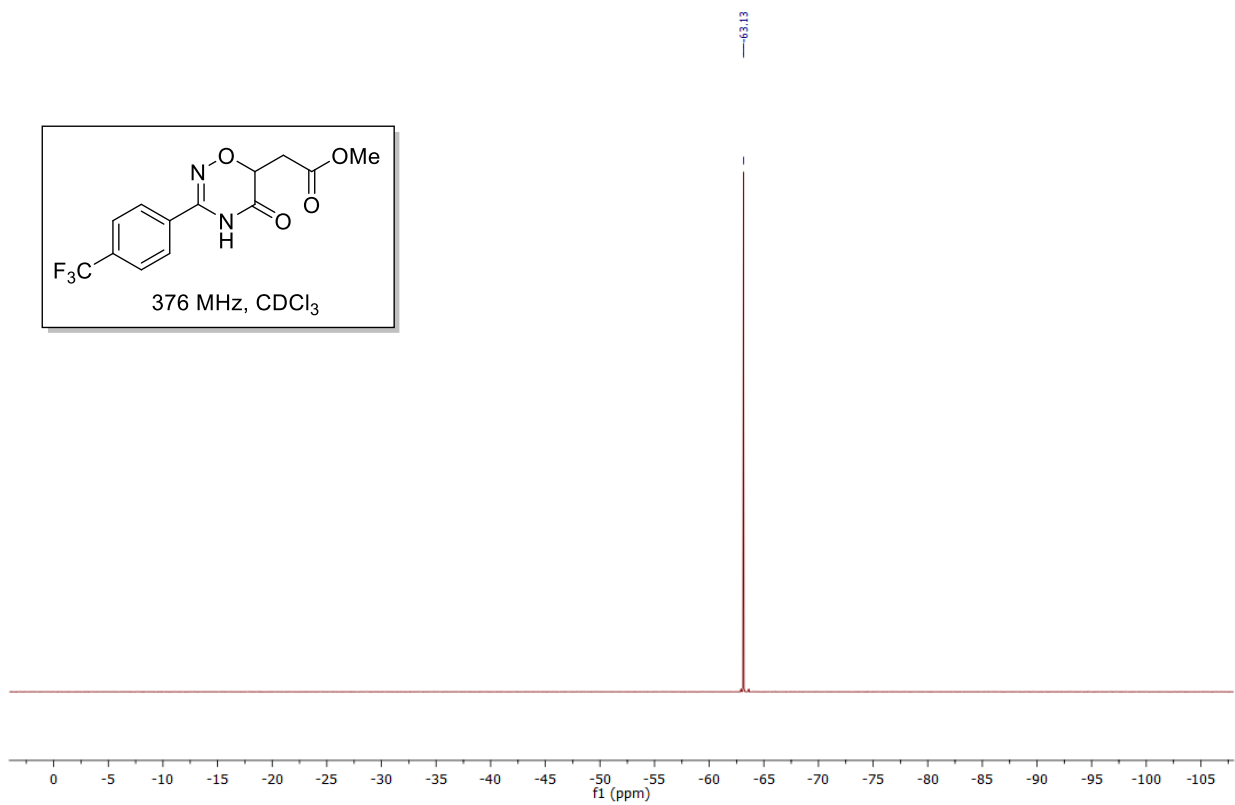



$^1\text{H}$ ,  $^{13}\text{C}$  and  $^{19}\text{F}$  spectra of methyl 2-(3-(4-fluorophenyl)-5-oxo-5,6-dihydro-4*H*-1,2,4-oxadiazin-6-yl)acetate **4f**

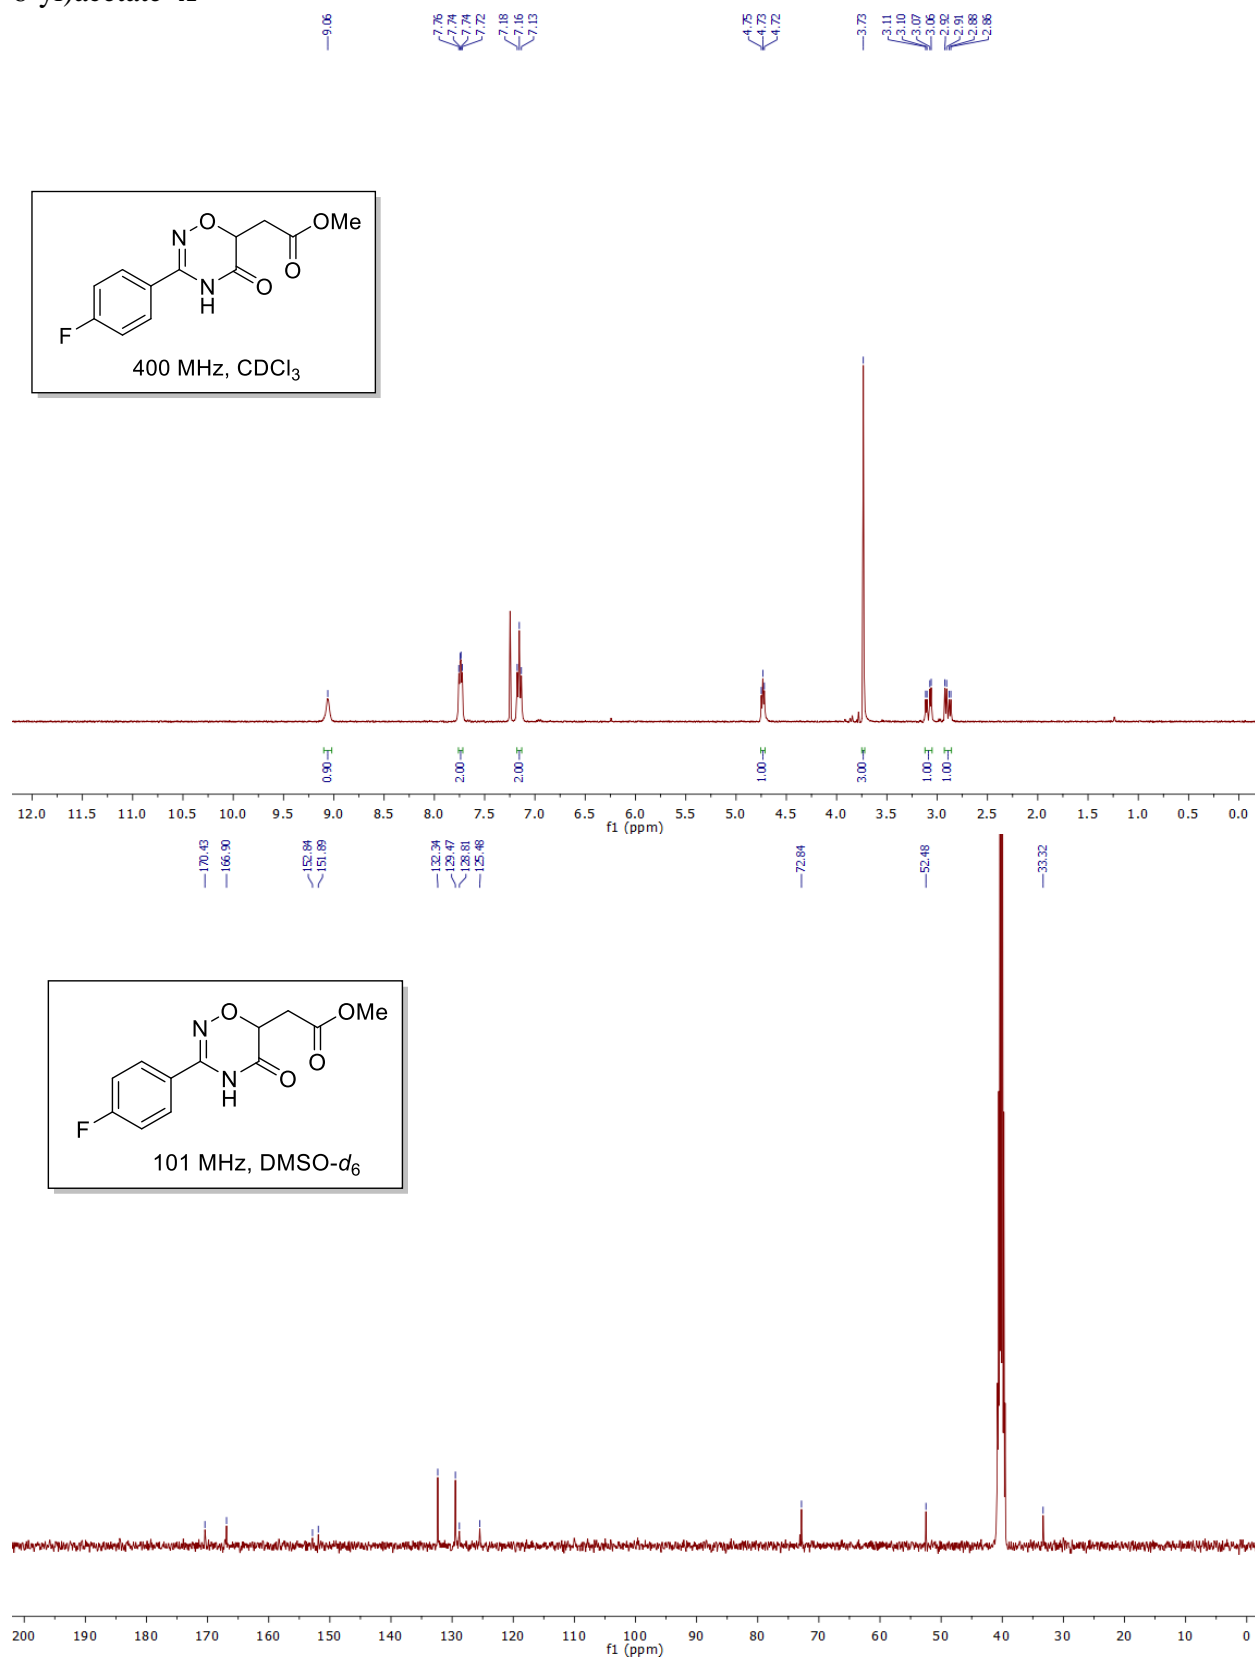

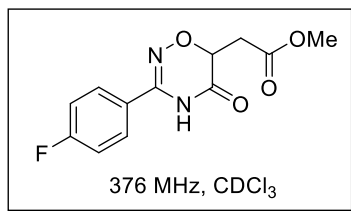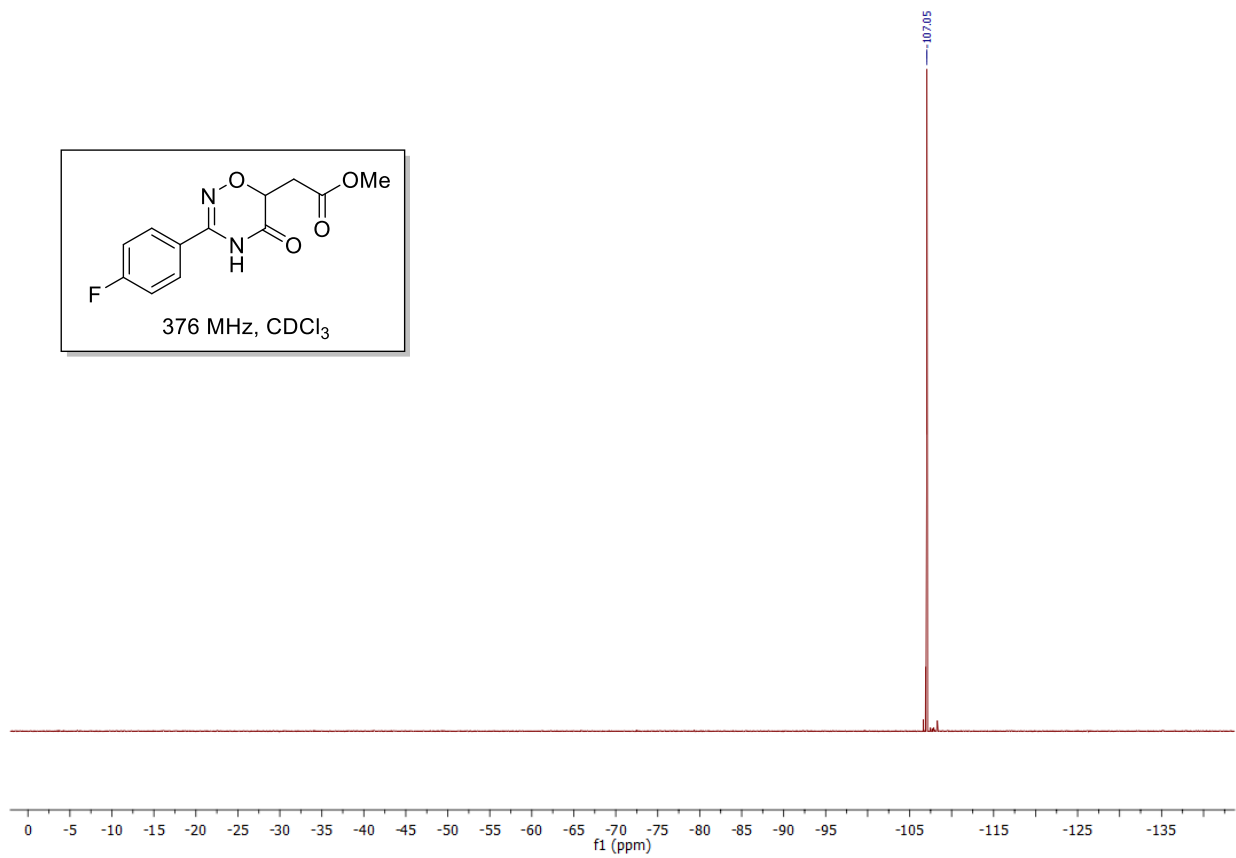

$^1\text{H}$  and  $^{13}\text{C}$  spectra of methyl -(3-(4-bromophenyl)-5-oxo-5,6-dihydro-4*H*-1,2,4-oxadiazin-6-yl)acetate **4g**

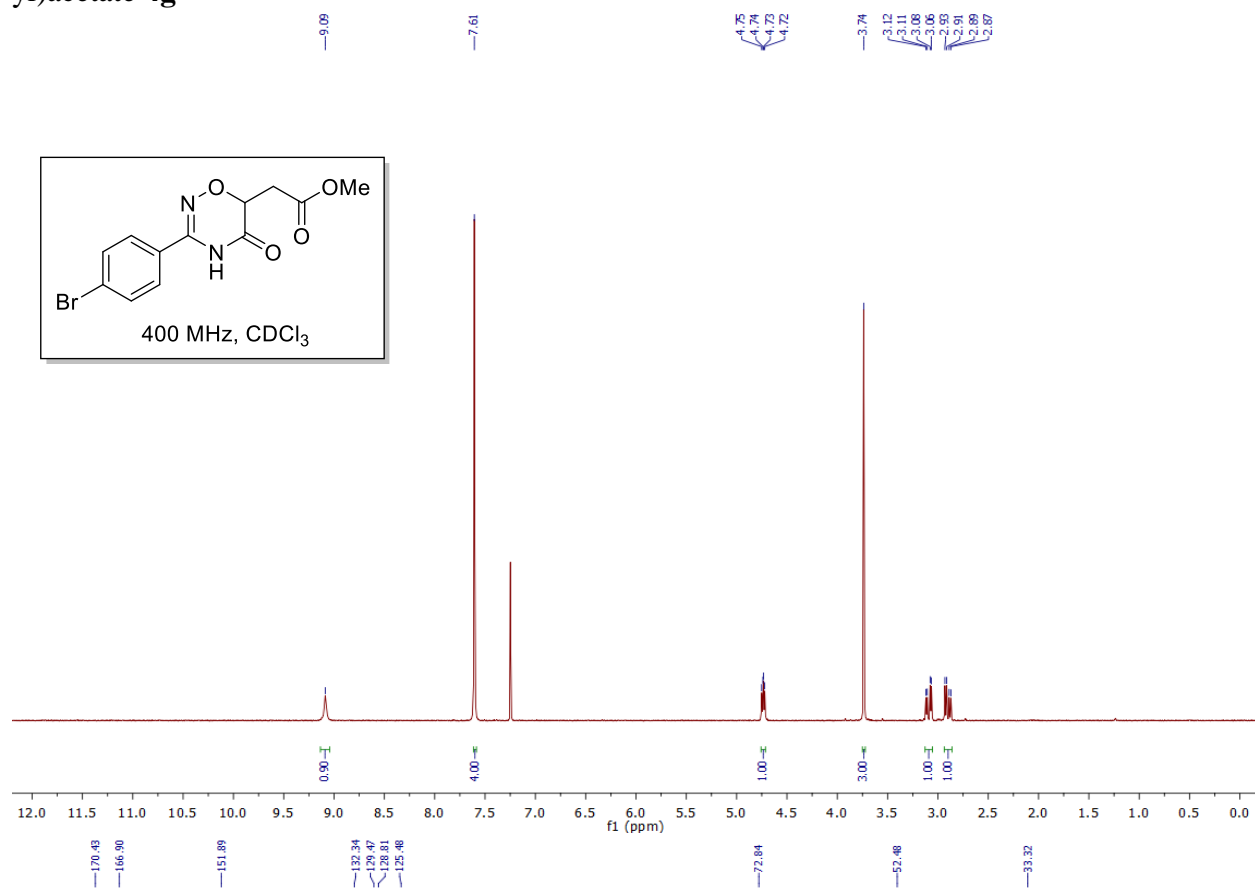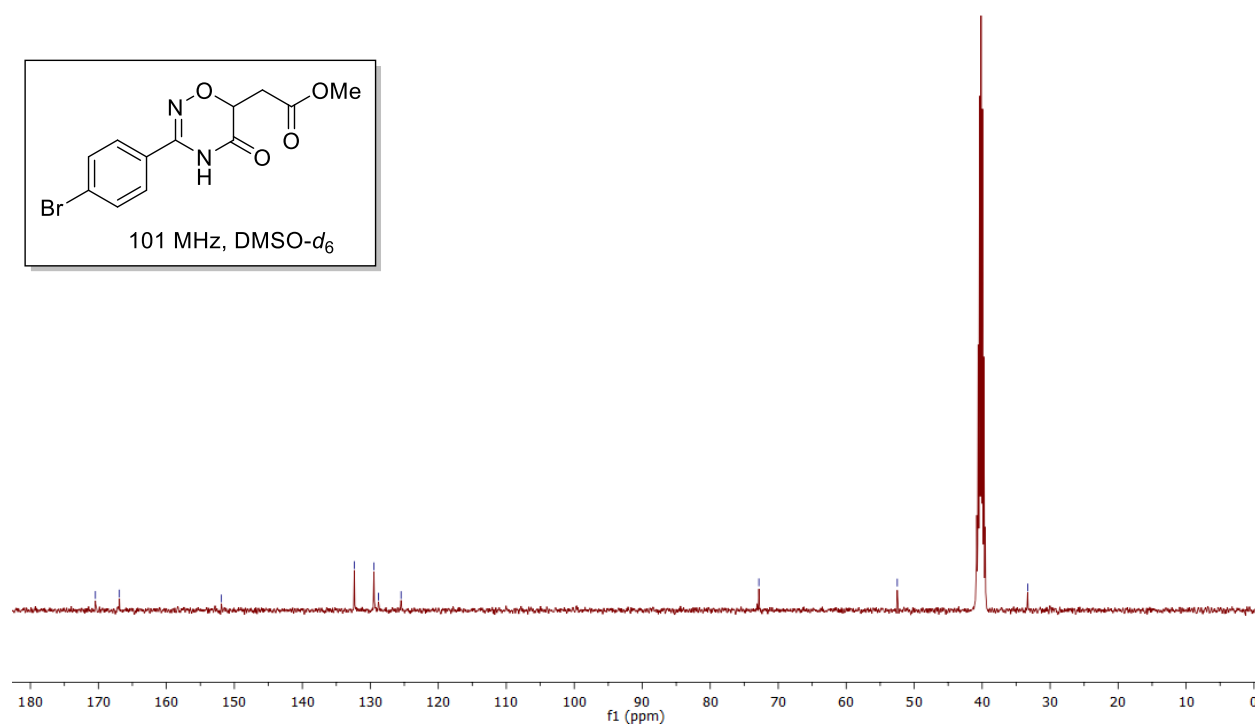

$^1\text{H}$  and  $^{13}\text{C}$  spectra of methyl 2-(3-(4-chlorophenyl)-5-oxo-5,6-dihydro-4*H*-1,2,4-oxadiazin-6-yl)acetate **4h**

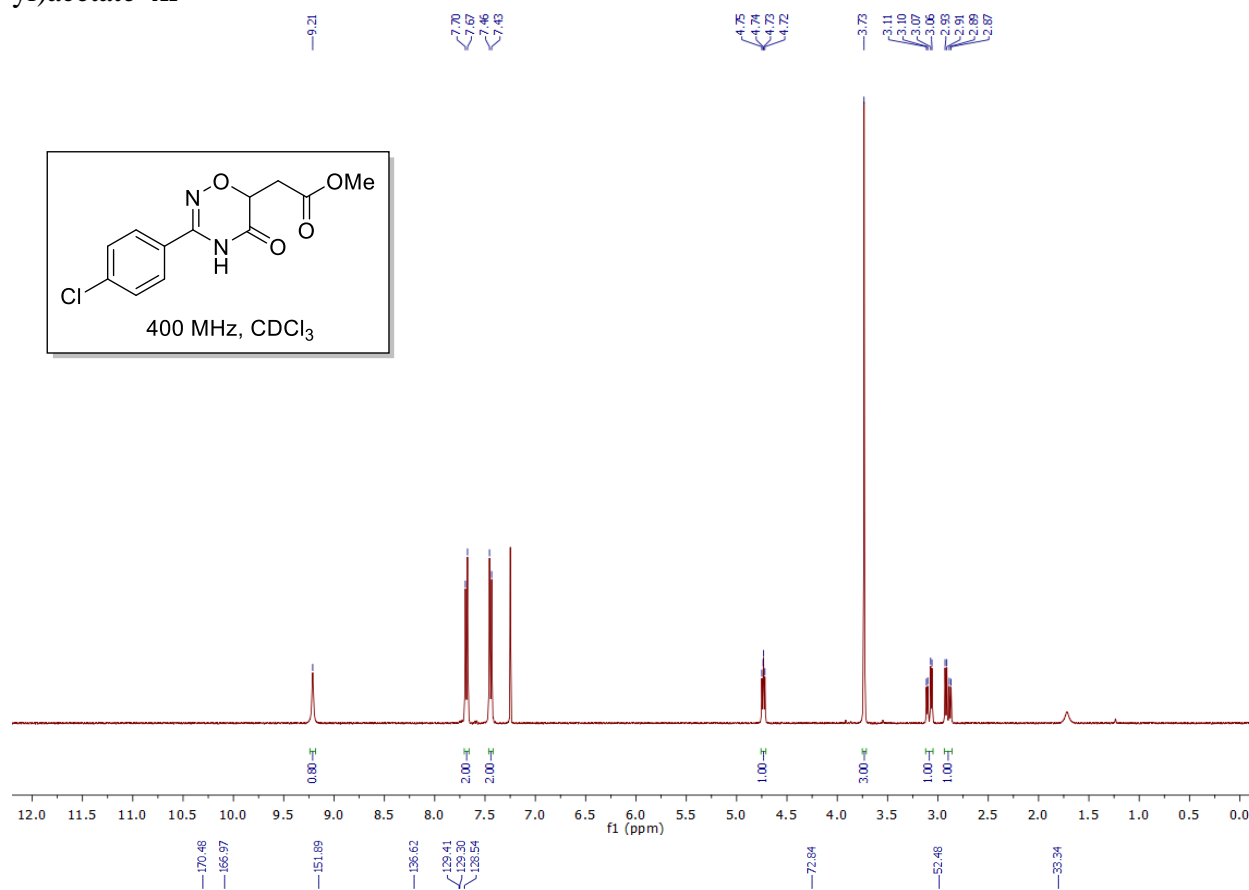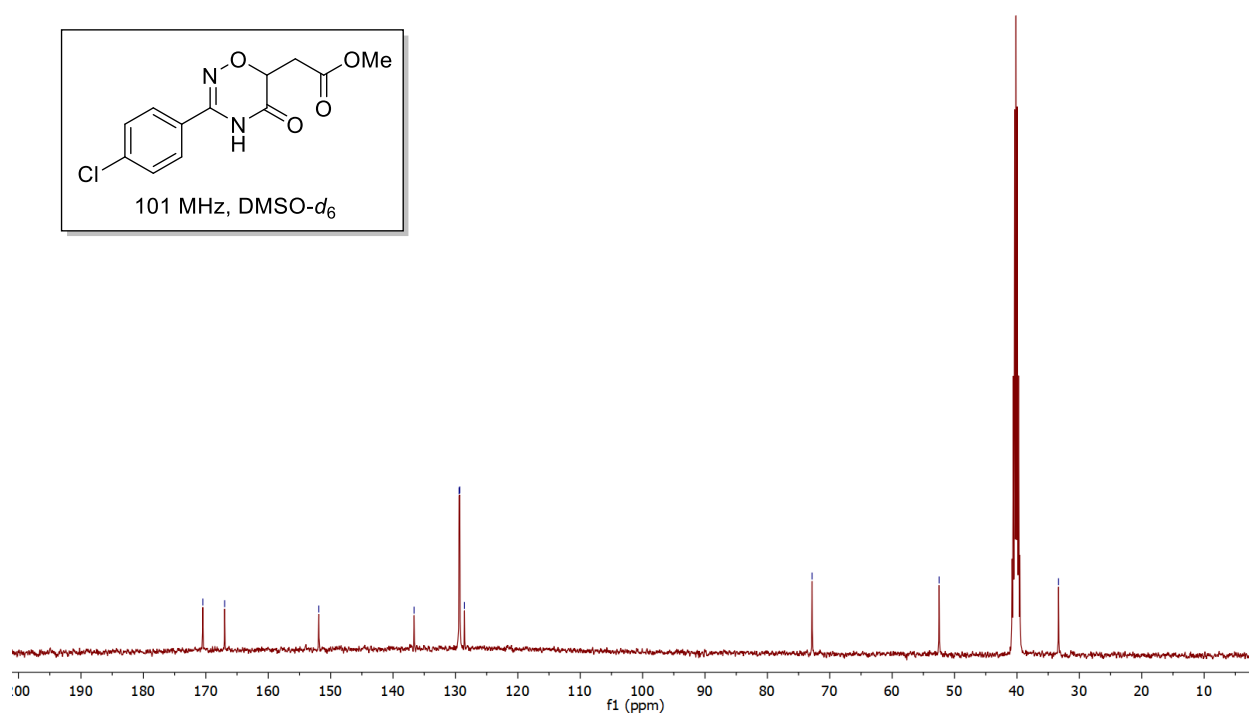

$^1\text{H}$  and  $^{13}\text{C}$  spectra of methyl 2-(3-(2-methylphenyl)-5-oxo-5,6-dihydro-4*H*-1,2,4-oxadiazin-6-yl)acetate **4i**

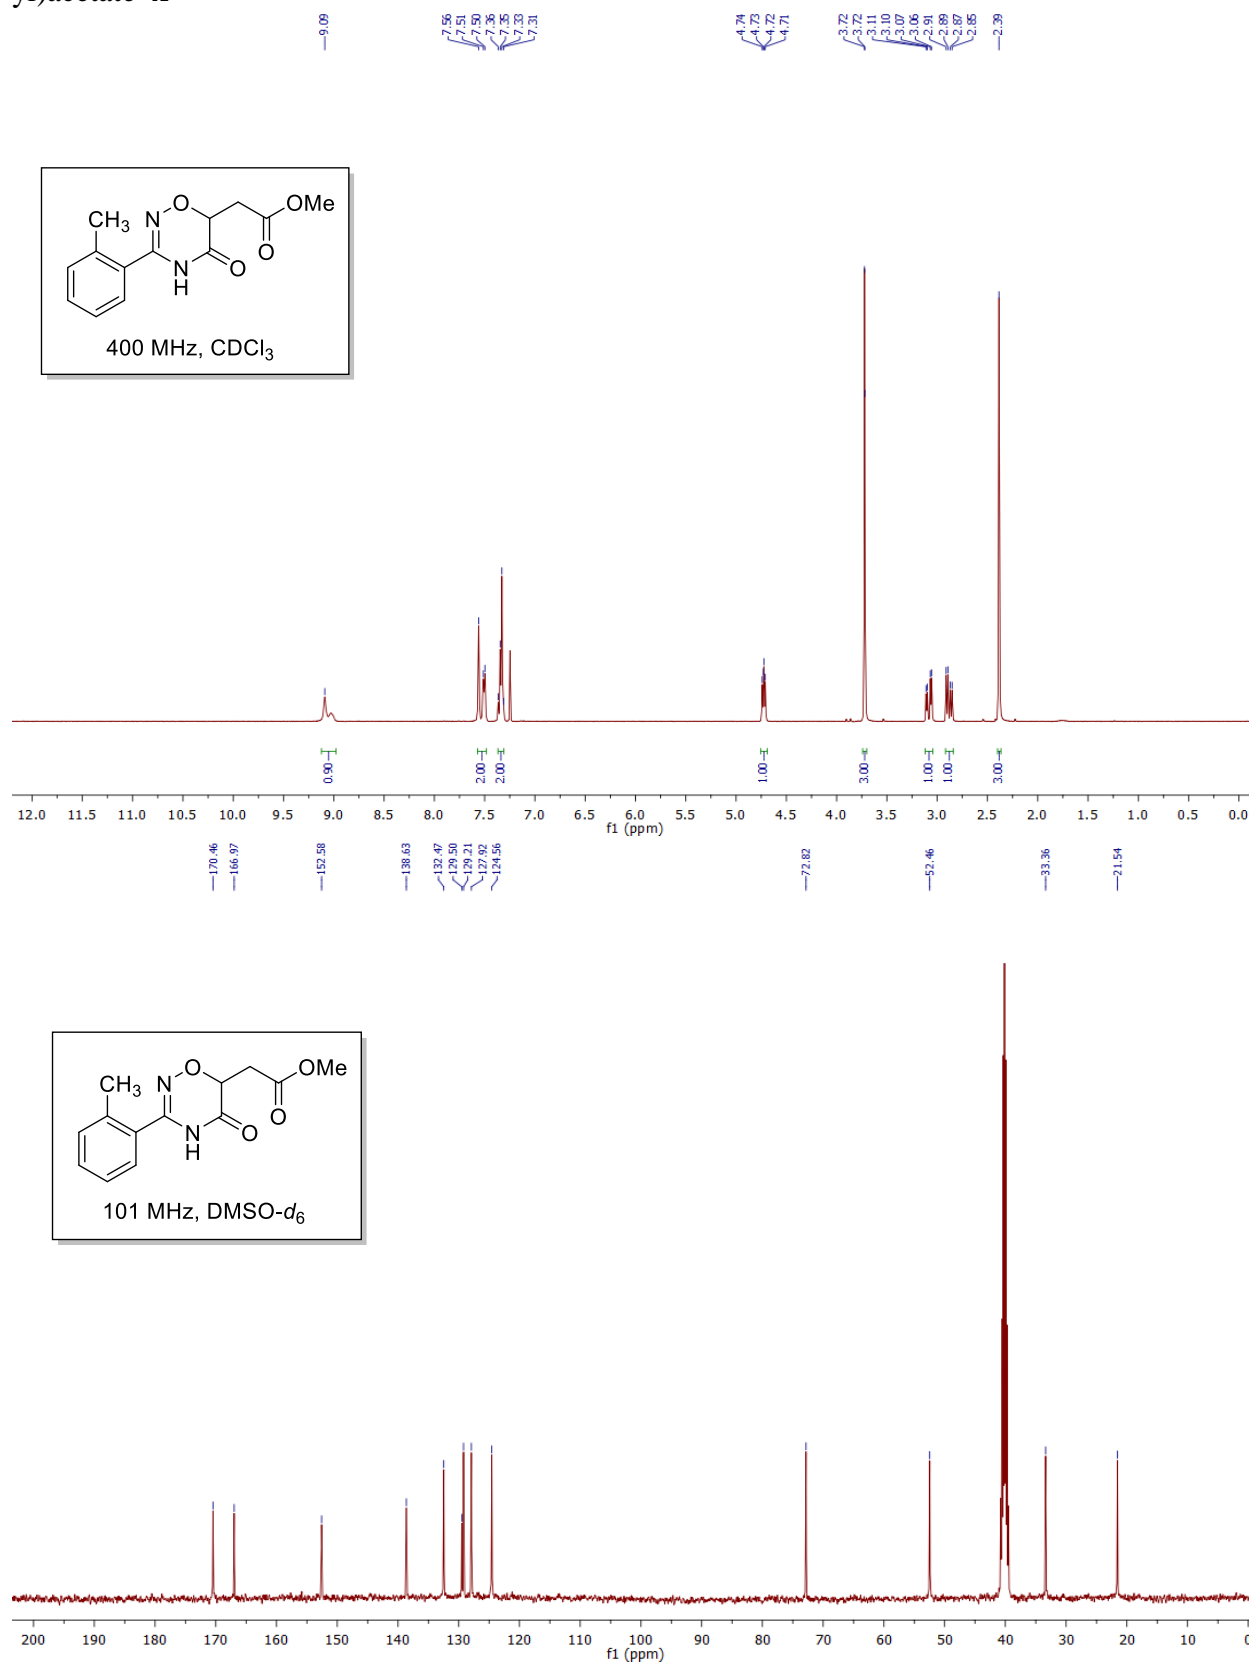

$^1\text{H}$  and  $^{13}\text{C}$  spectra of methyl 2-(3-(2-methoxyphenyl)-5-oxo-5,6-dihydro-4*H*-1,2,4-oxadiazin-6-yl)acetate **4j**

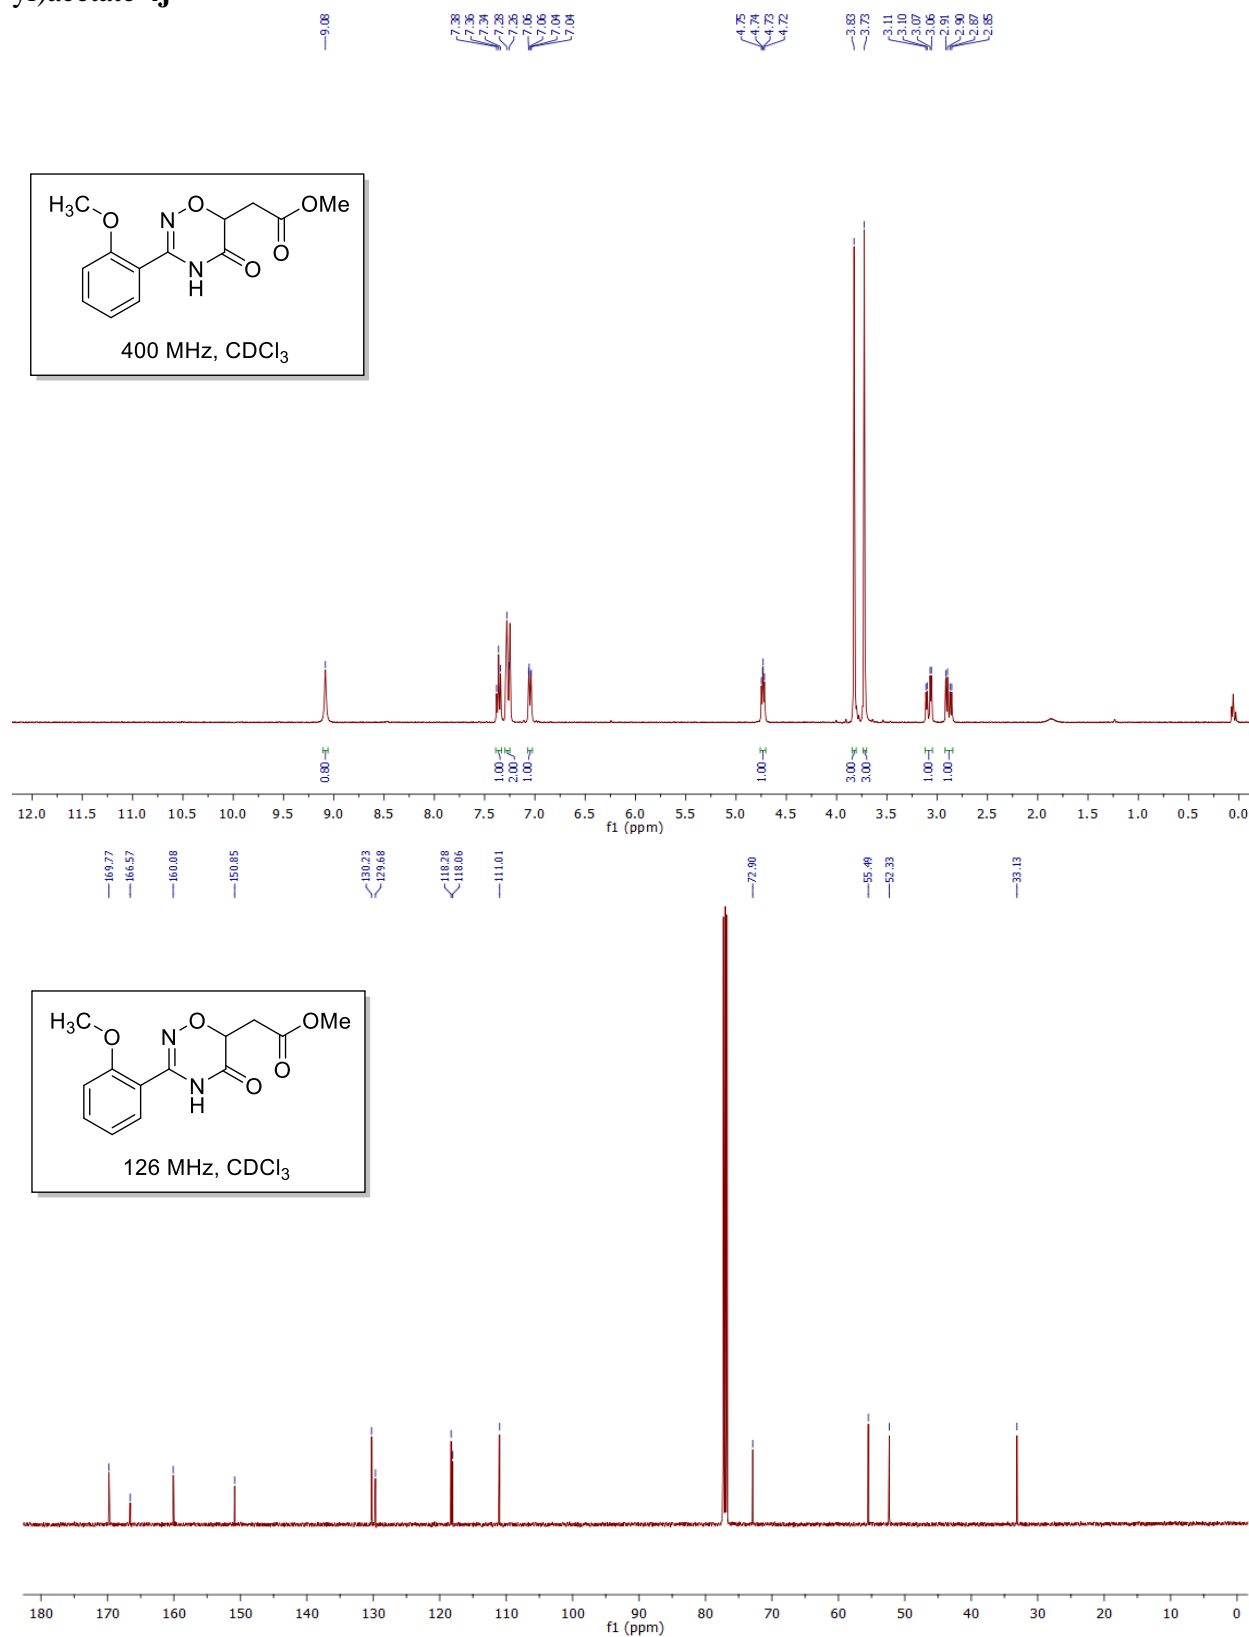

$^1\text{H}$  and  $^{13}\text{C}$  spectra of methyl 2-(3-(2-chlorophenyl)-5-oxo-5,6-dihydro-4*H*-1,2,4-oxadiazin-6-yl)acetate **4k**

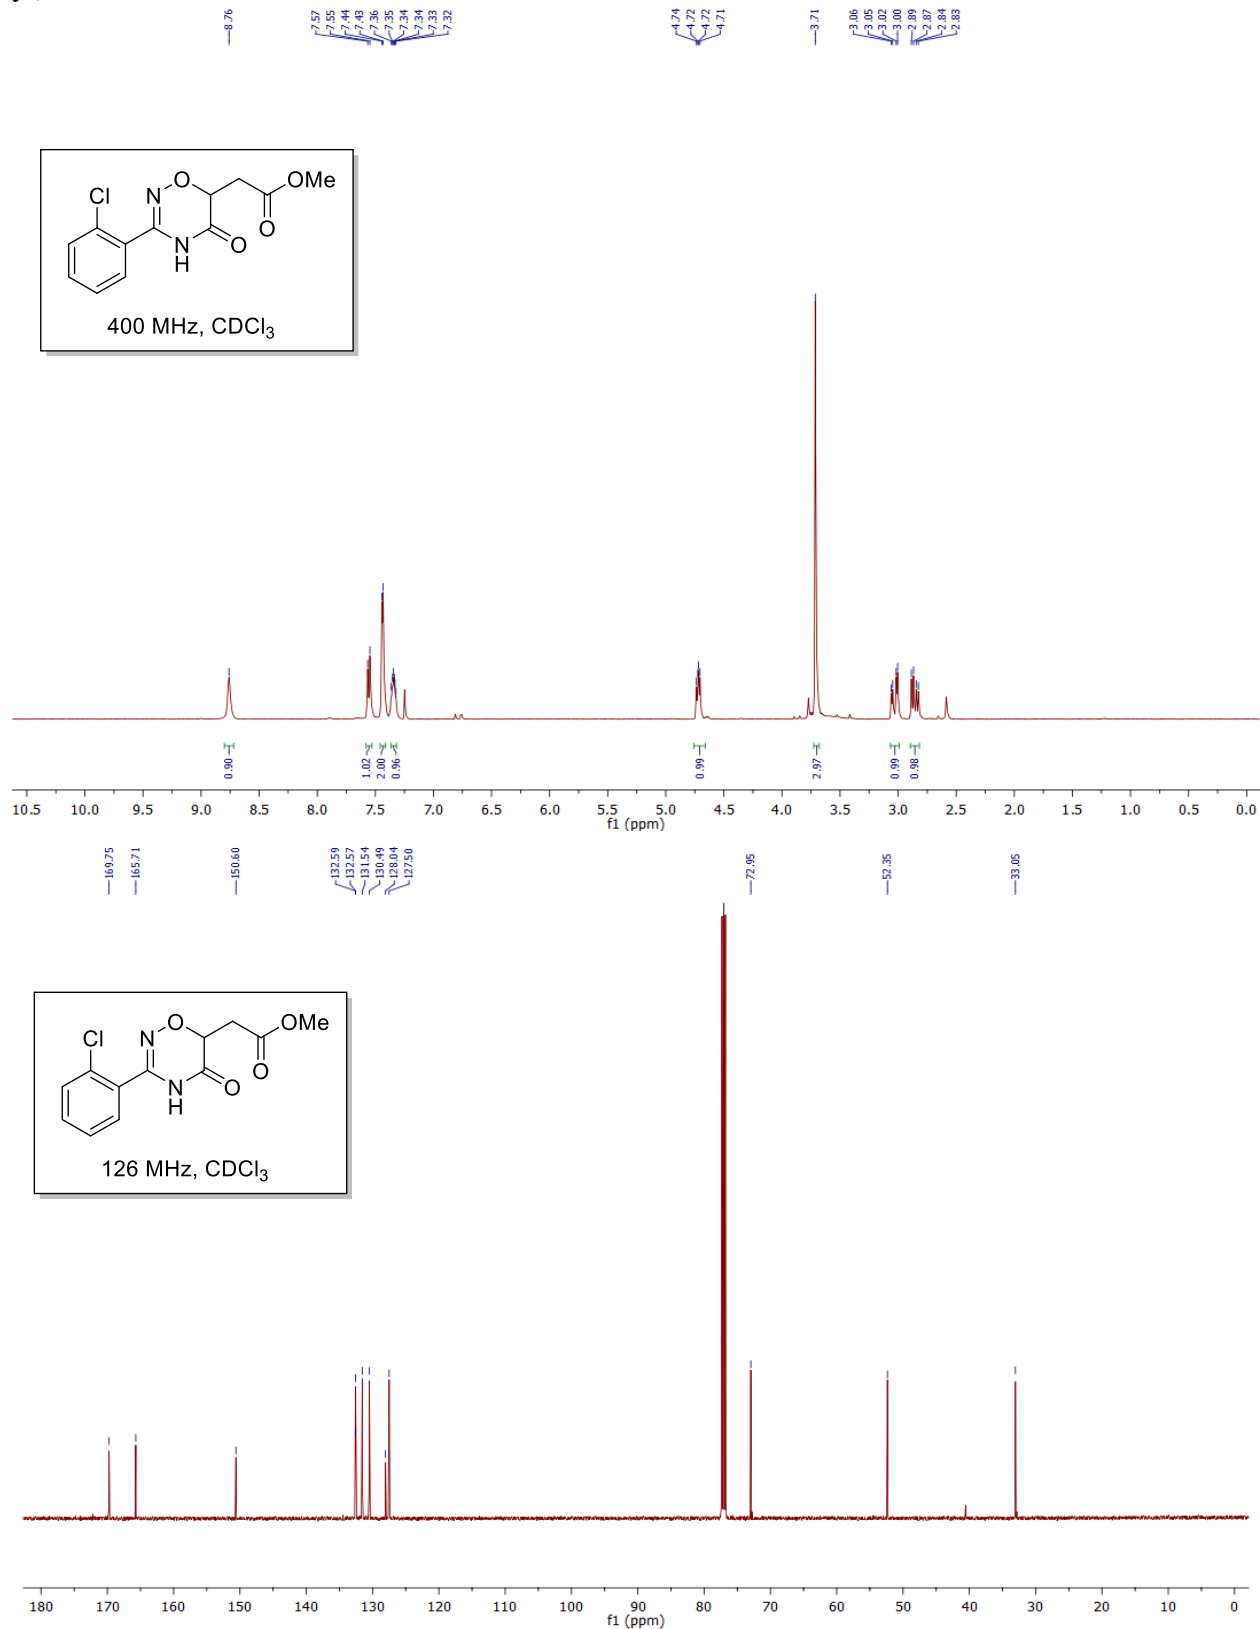

$^1\text{H}$  and  $^{13}\text{C}$  spectra of methyl 2-(3-(3,4-dichlorophenyl)-5-oxo-5,6-dihydro-4*H*-1,2,4-oxadiazin-6-yl)acetate **4l**

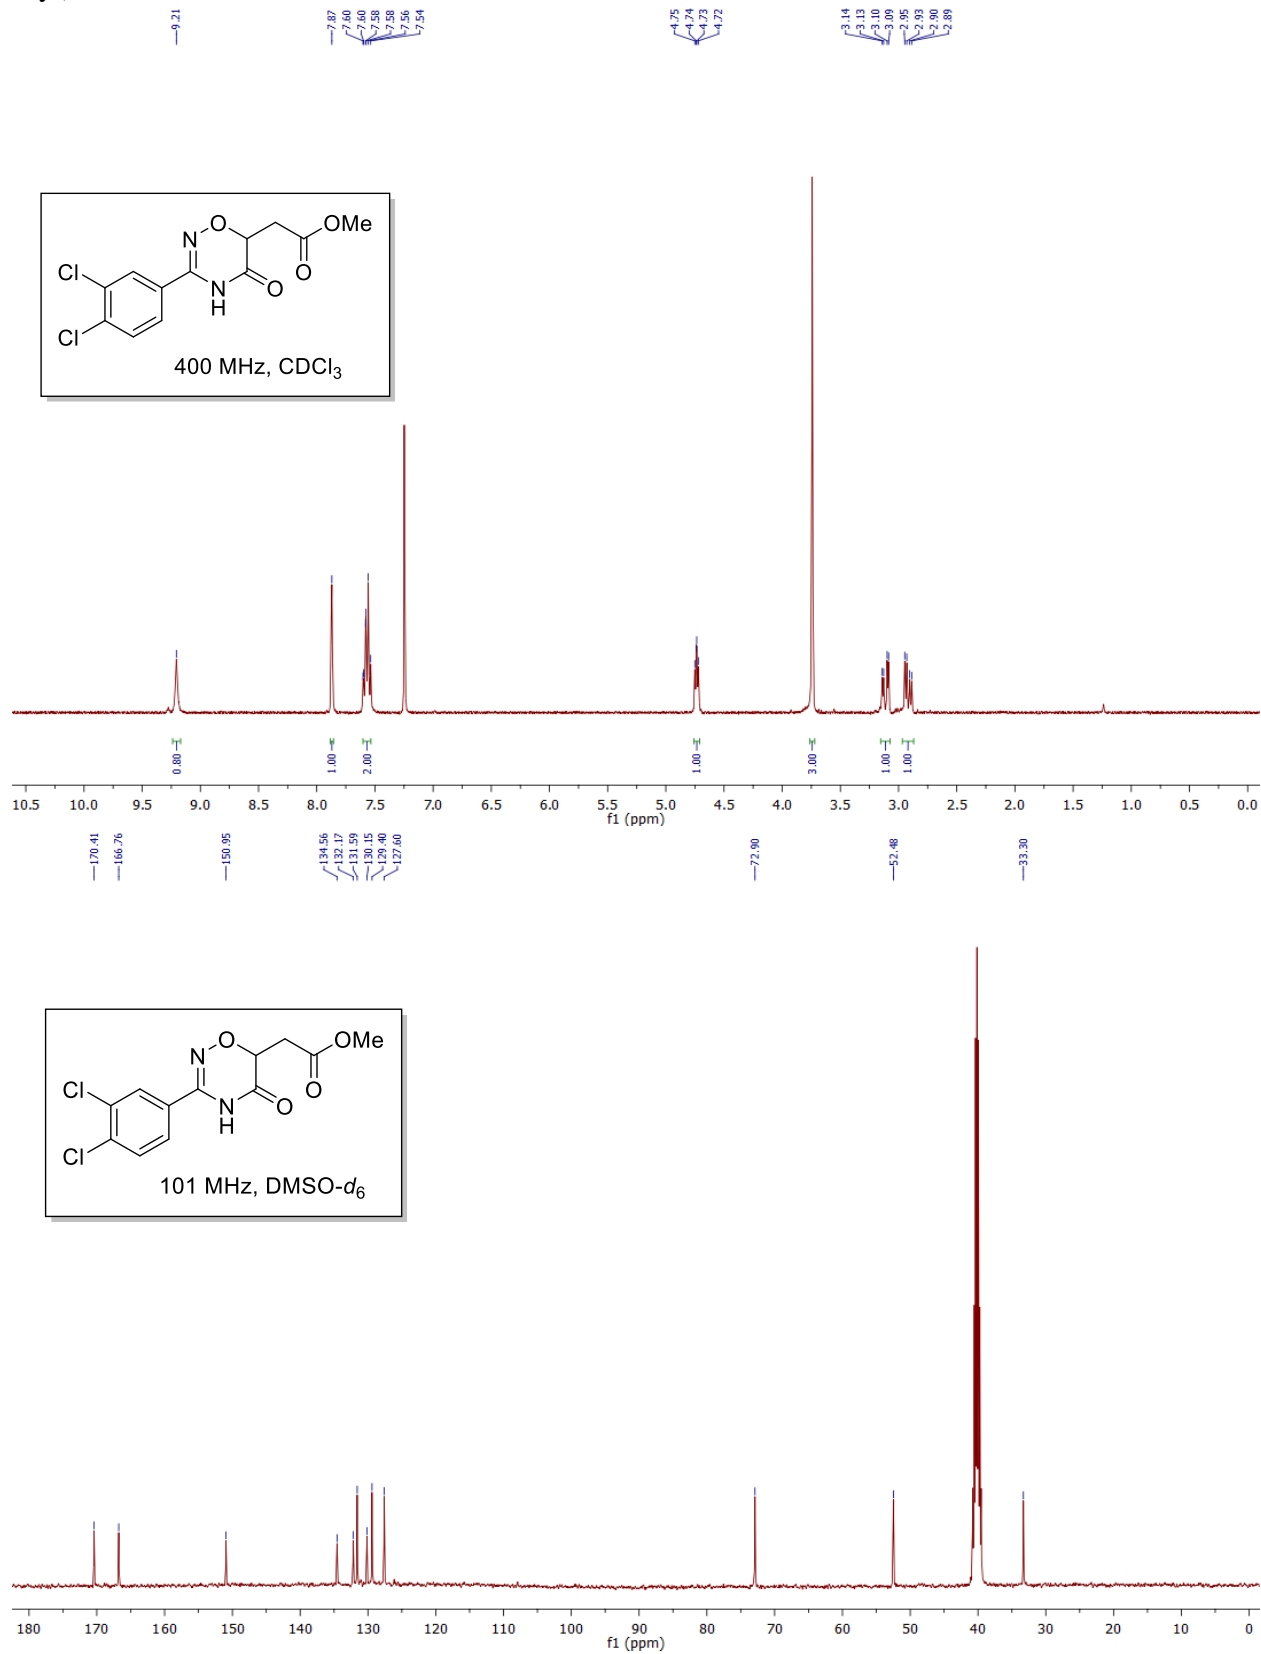



$^1\text{H}$  and  $^{13}\text{C}$  spectra of methyl 2-(3-(3,5-dichlorophenyl)-5-oxo-5,6-dihydro-4*H*-1,2,4-oxadiazin-6-yl)acetate **4m**

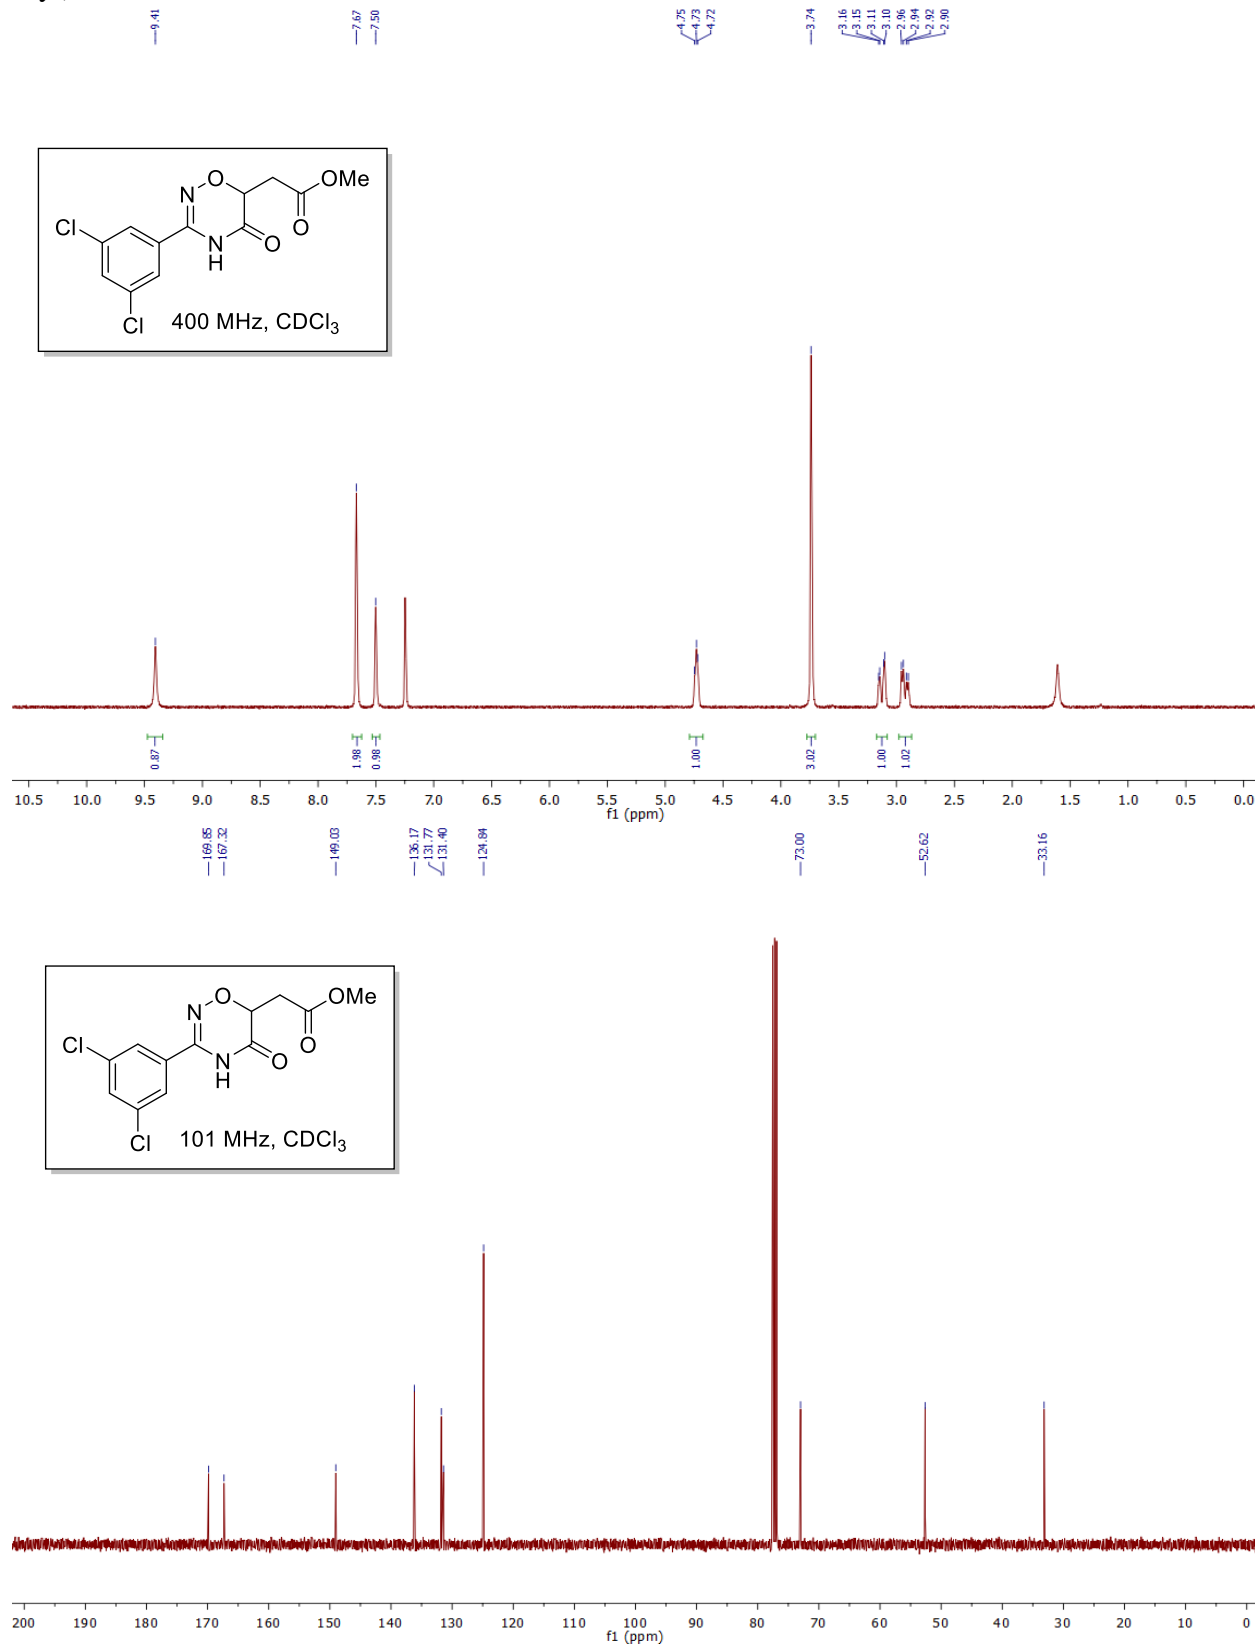

$^1\text{H}$  and  $^{13}\text{C}$  spectra of methyl 2-(3-(5-methylthiophen-2-yl)-5-oxo-5,6-dihydro-4*H*-1,2,4-oxadiazin-6-yl)acetate **4n**

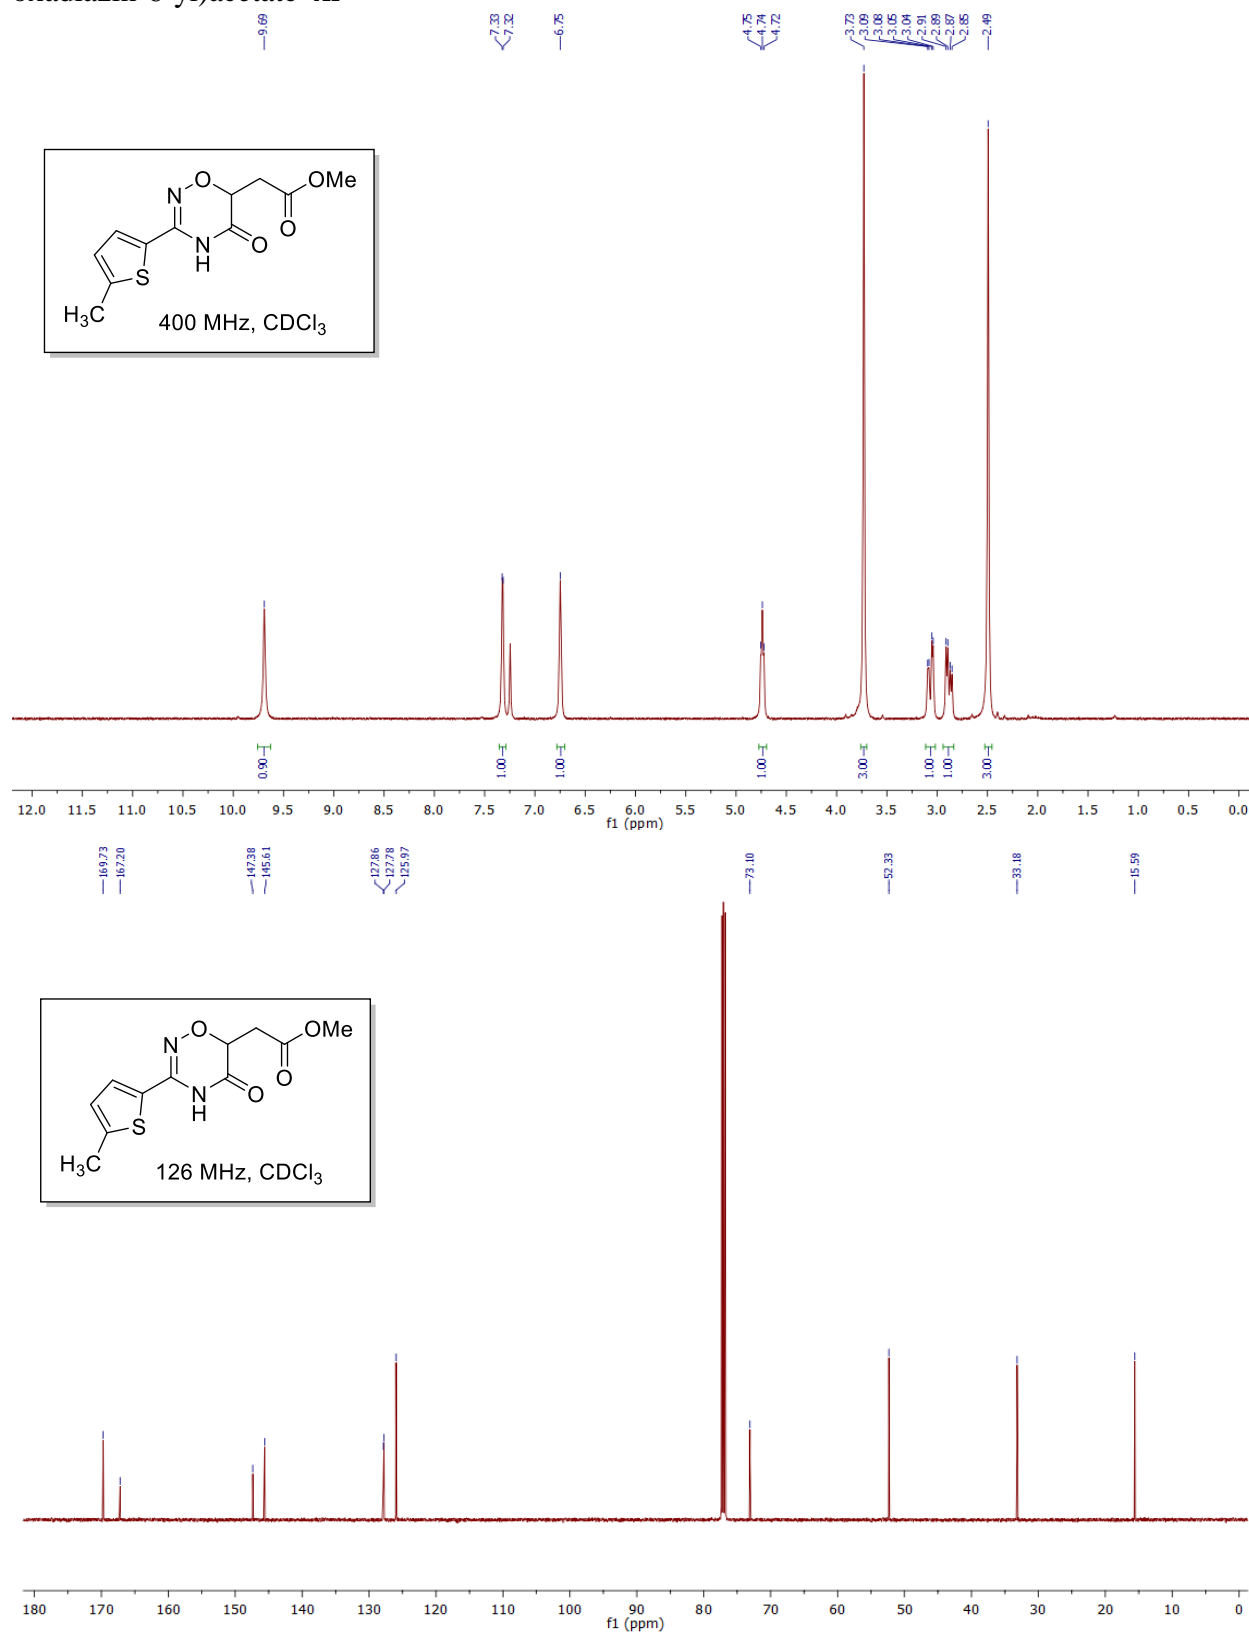

$^1\text{H}$  and  $^{13}\text{C}$  spectra of methyl 2-(5-oxo-3-(pyridin-4-yl)-5,6-dihydro-4*H*-1,2,4-oxadiazin-6-yl)acetate **4o**

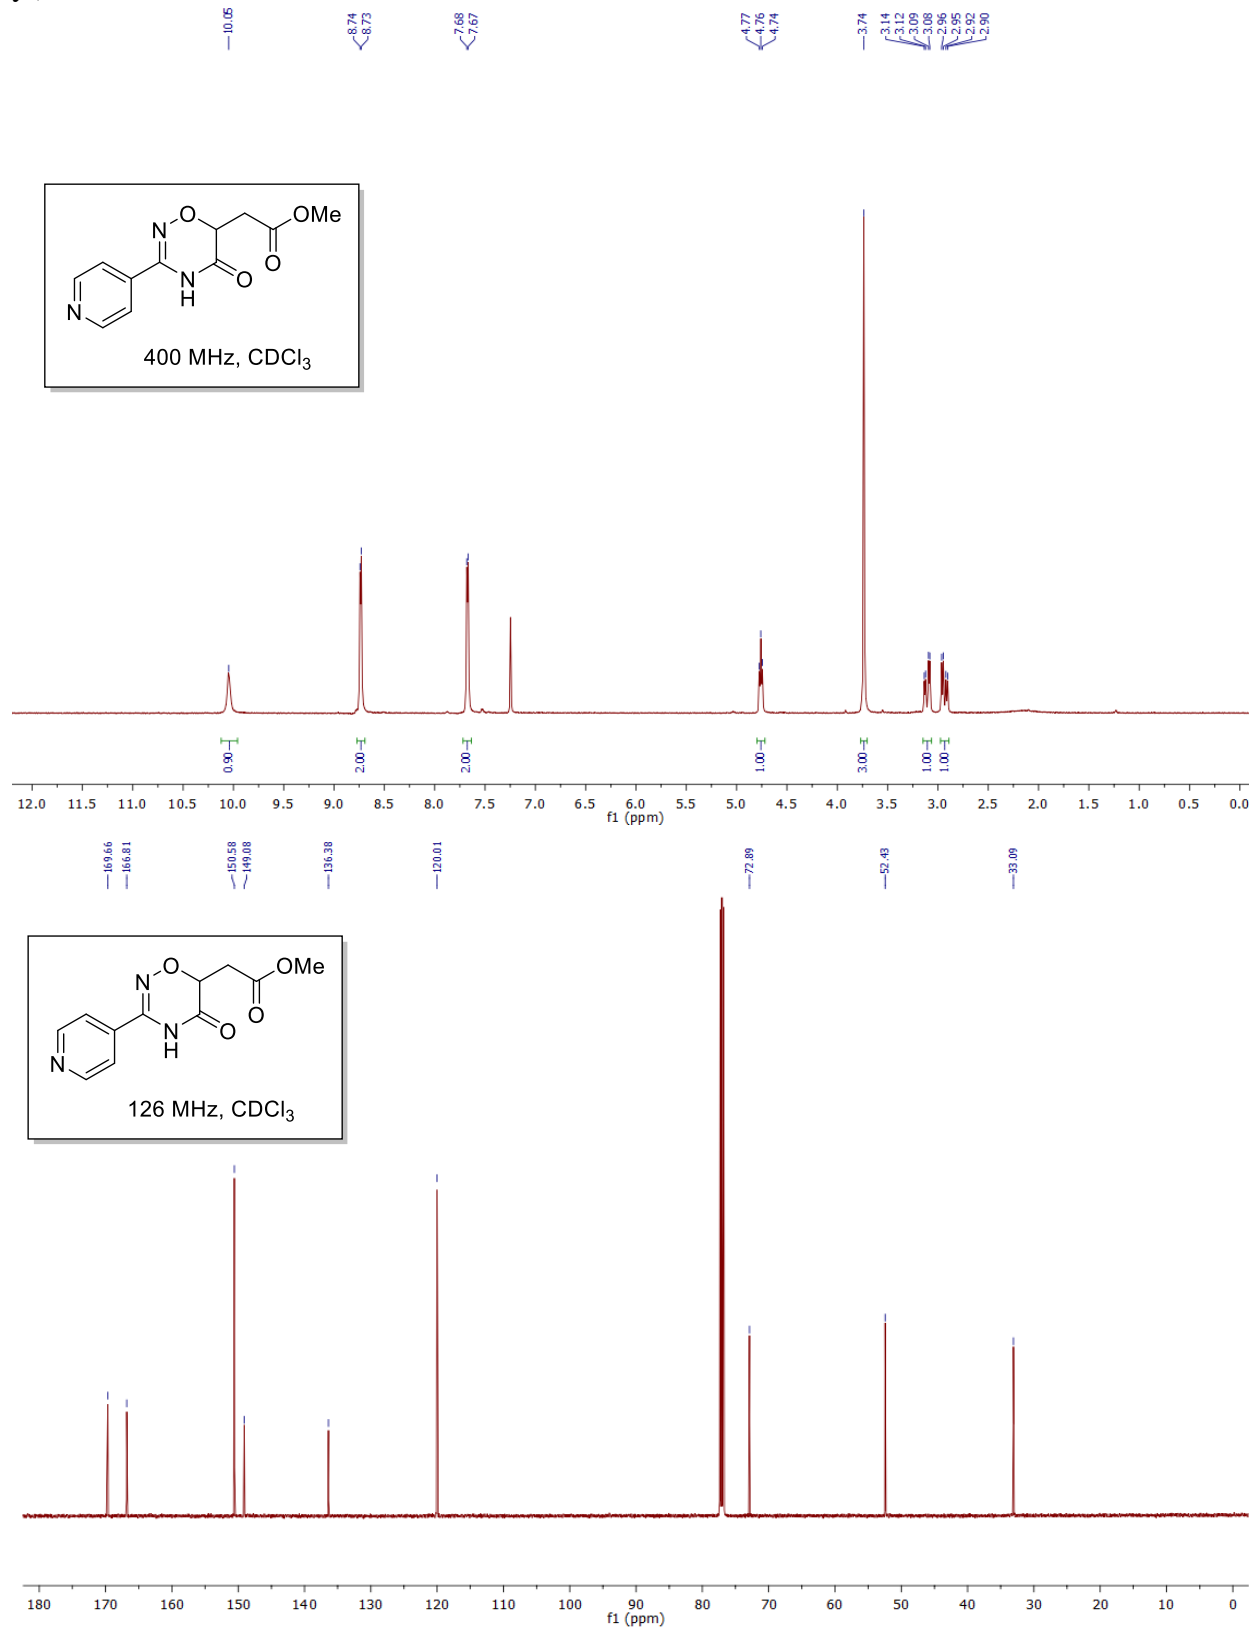

$^1\text{H}$  and  $^{13}\text{C}$  spectra of methyl 2-(5-oxo-3-(pyridin-2-yl)-5,6-dihydro-4*H*-1,2,4-oxadiazin-6-yl)acetate **4p**

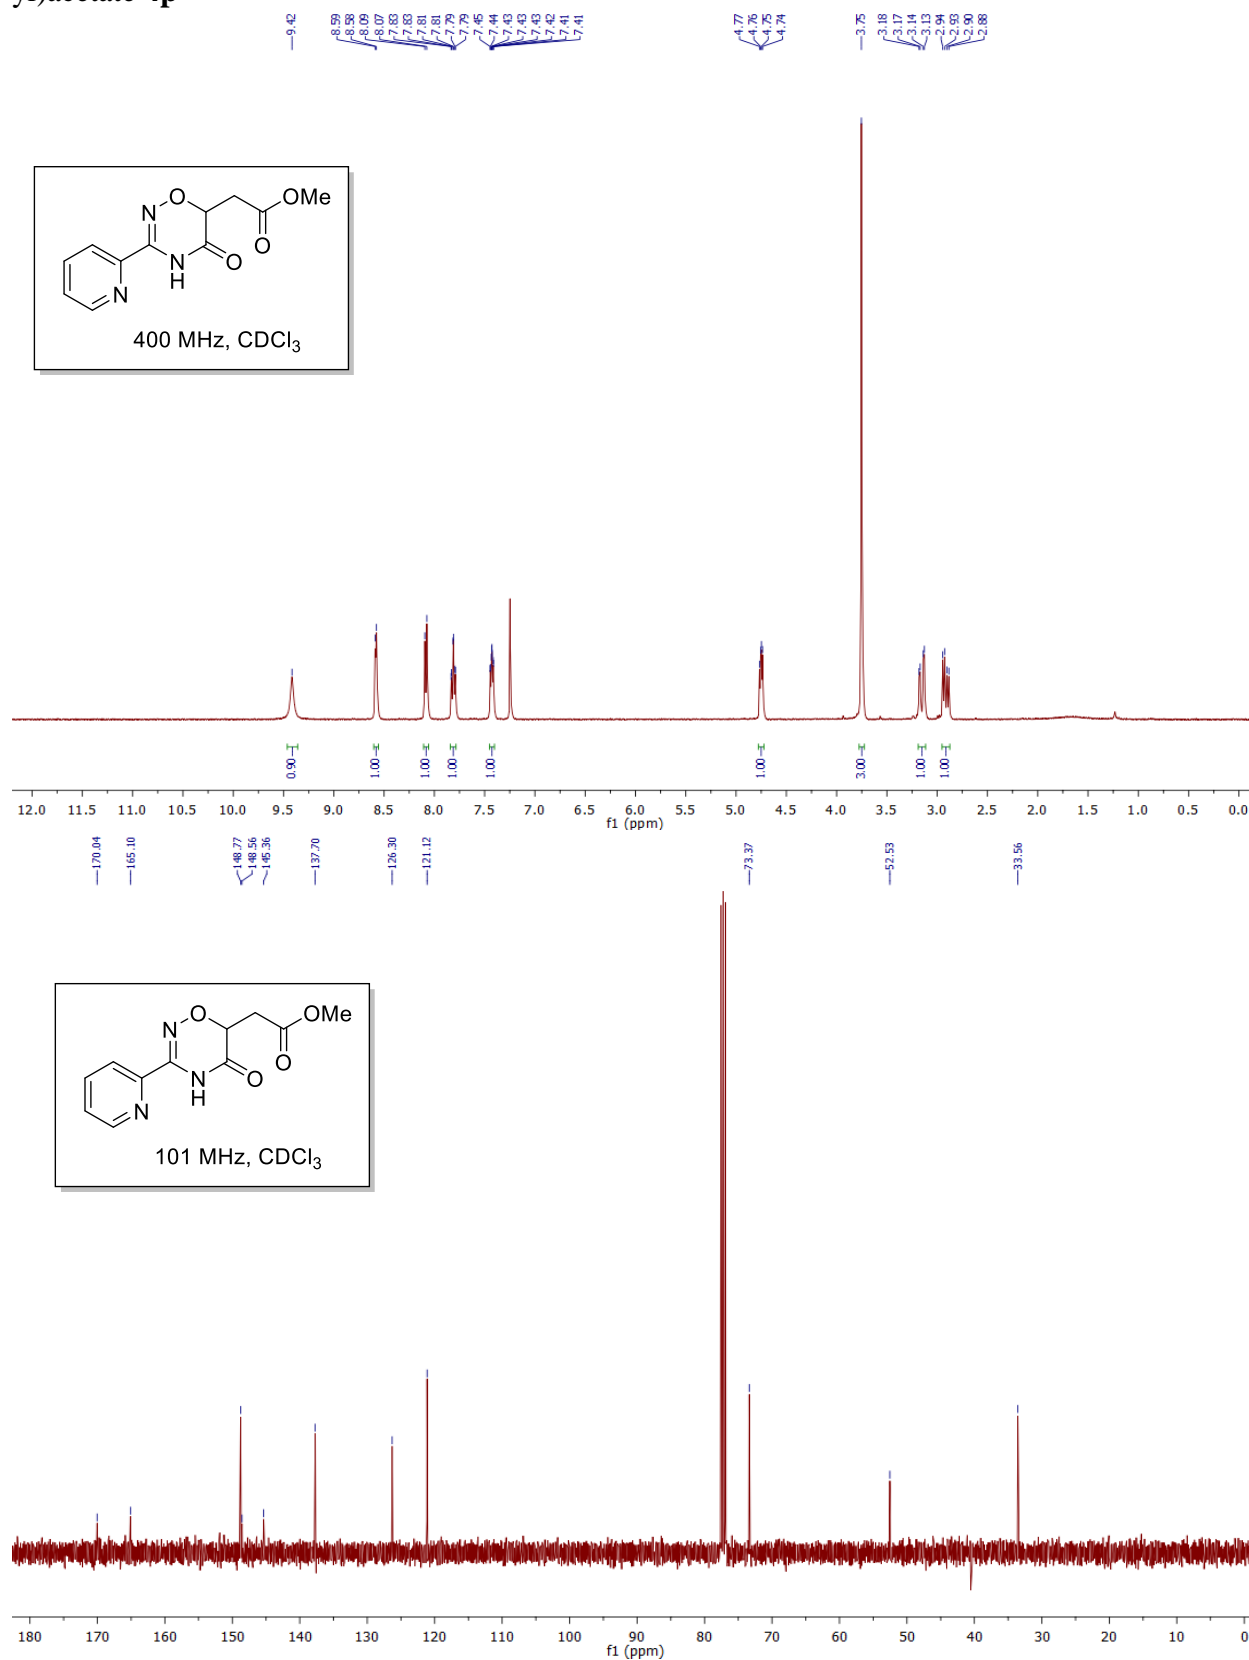

$^1\text{H}$  and  $^{13}\text{C}$  spectra of 3-(4-methylphenyl)-6-((3-(4-methylphenyl)-1,2,4-oxadiazol-5-yl)methyl)-4*H*-1,2,4-oxadiazin-5(6*H*)-one **5a**

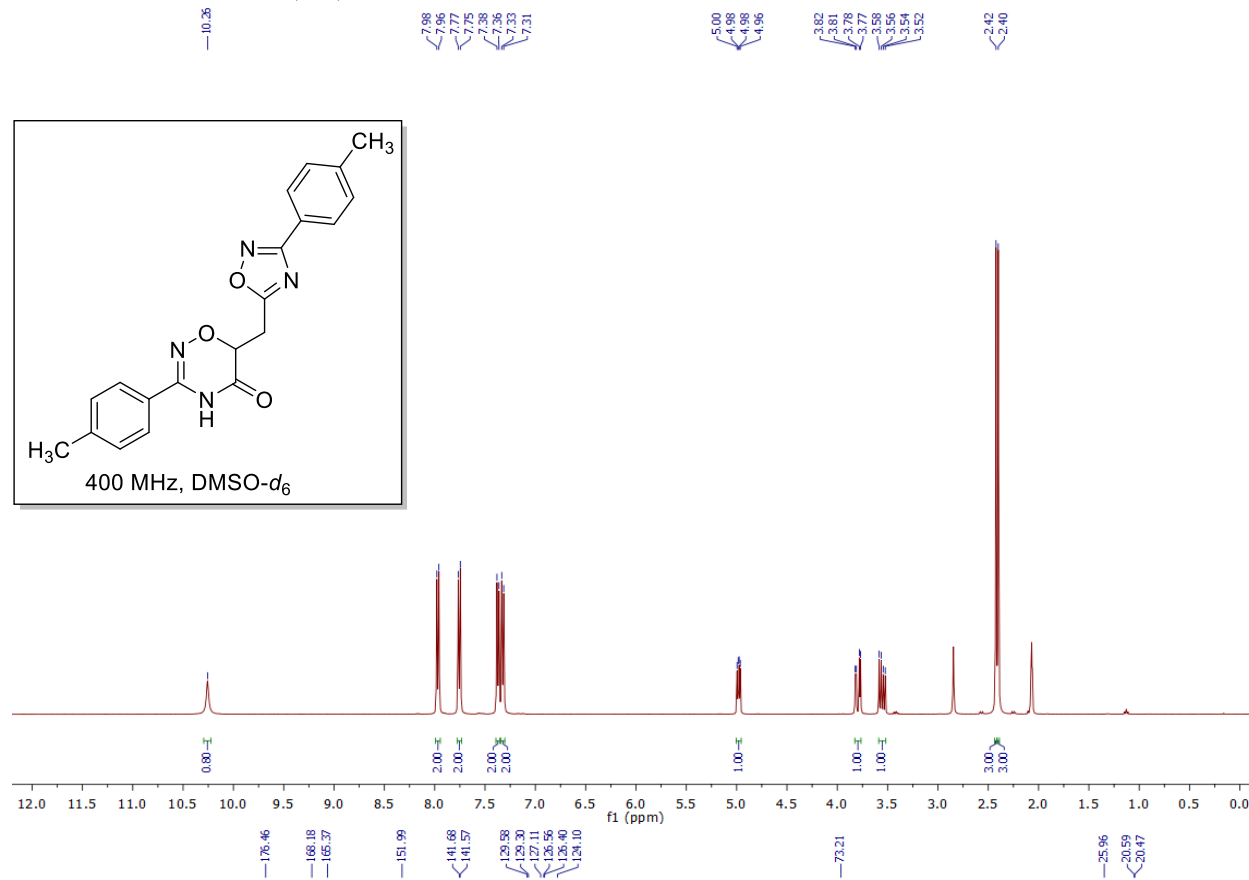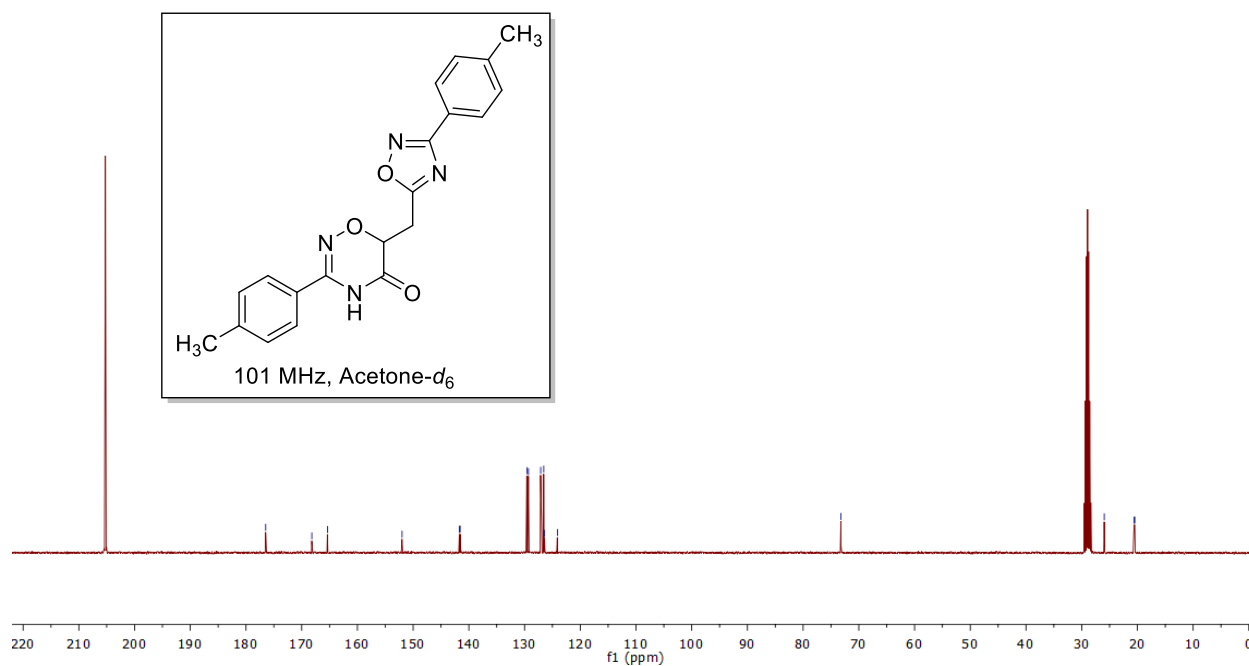

$^1\text{H}$  and  $^{13}\text{C}$  spectra of 3-phenyl-6-((3-phenyl-1,2,4-oxadiazol-5-yl)methyl)-4*H*-1,2,4-oxadiazin-5(6*H*)-one **5b**

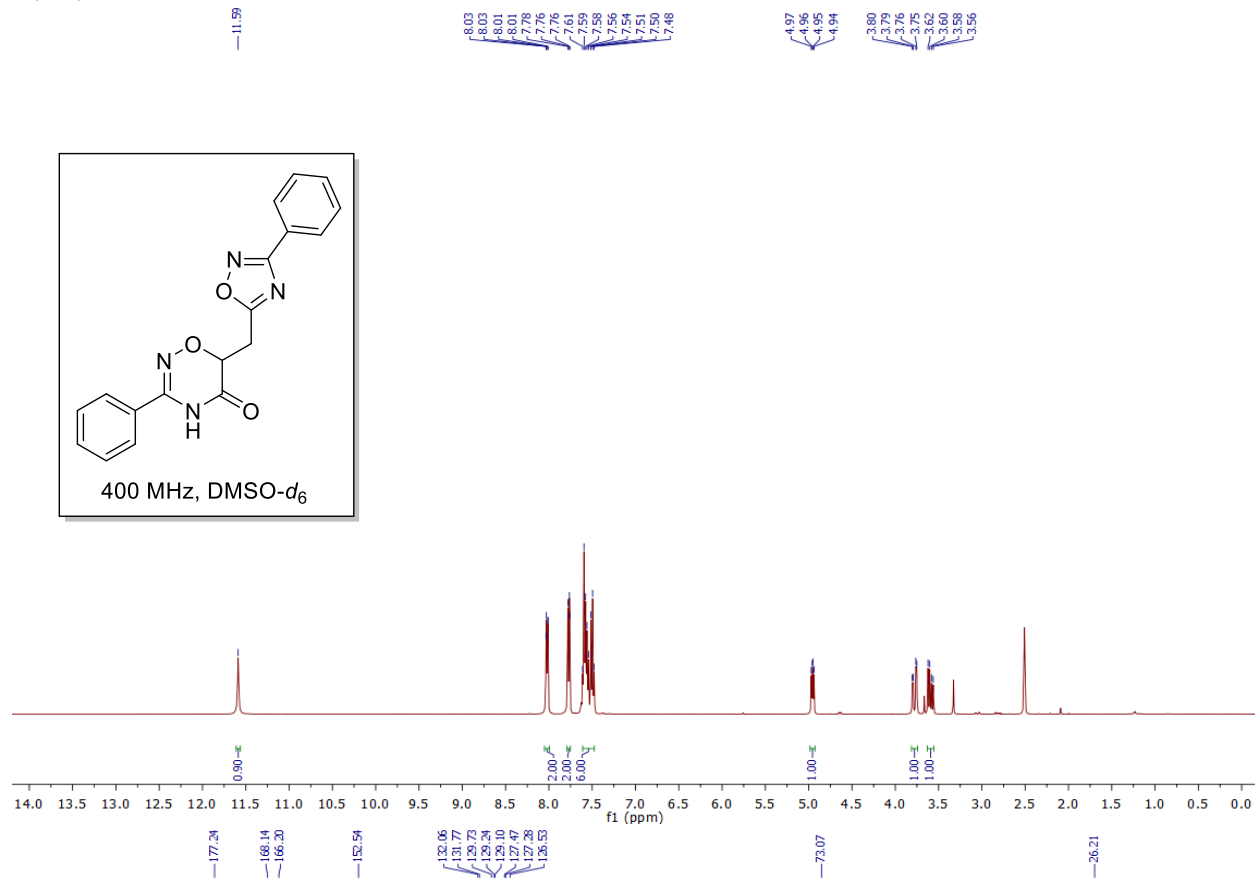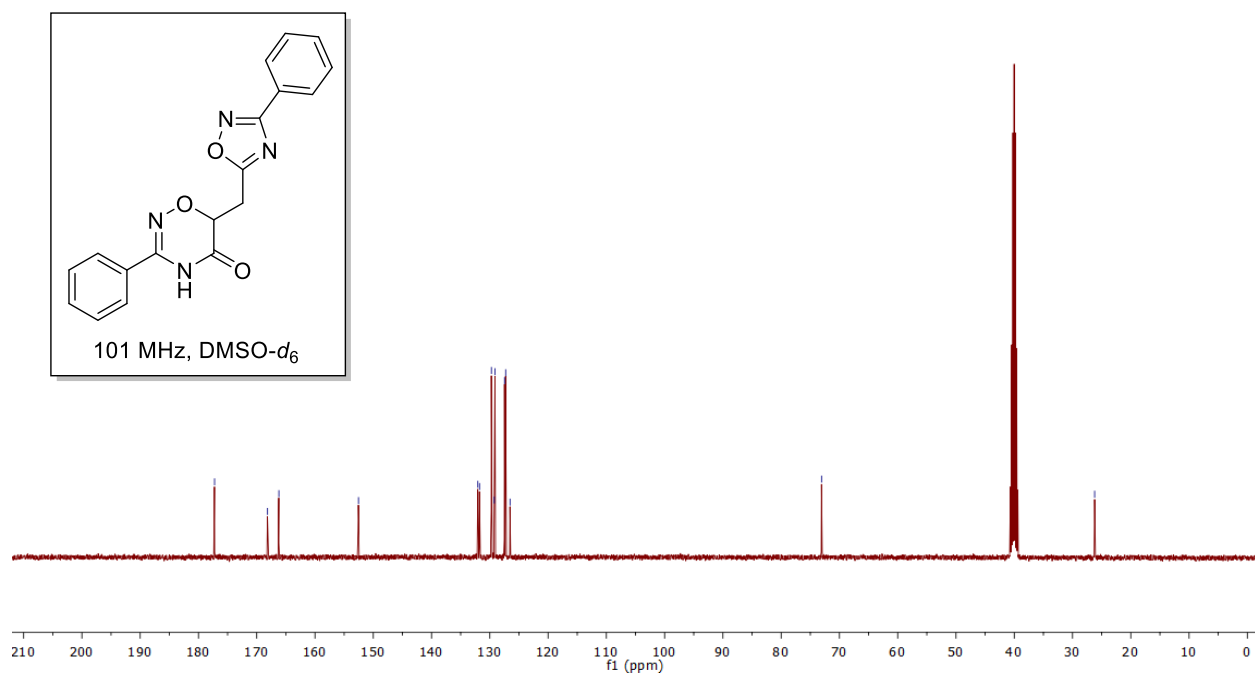

$^1\text{H}$  and  $^{13}\text{C}$  spectra of 3-(4-methoxyphenyl)-6-((3-(4-methoxyphenyl)-1,2,4-oxadiazol-5-yl)methyl)-4*H*-1,2,4-oxadiazin-5(6*H*)-one **5c**

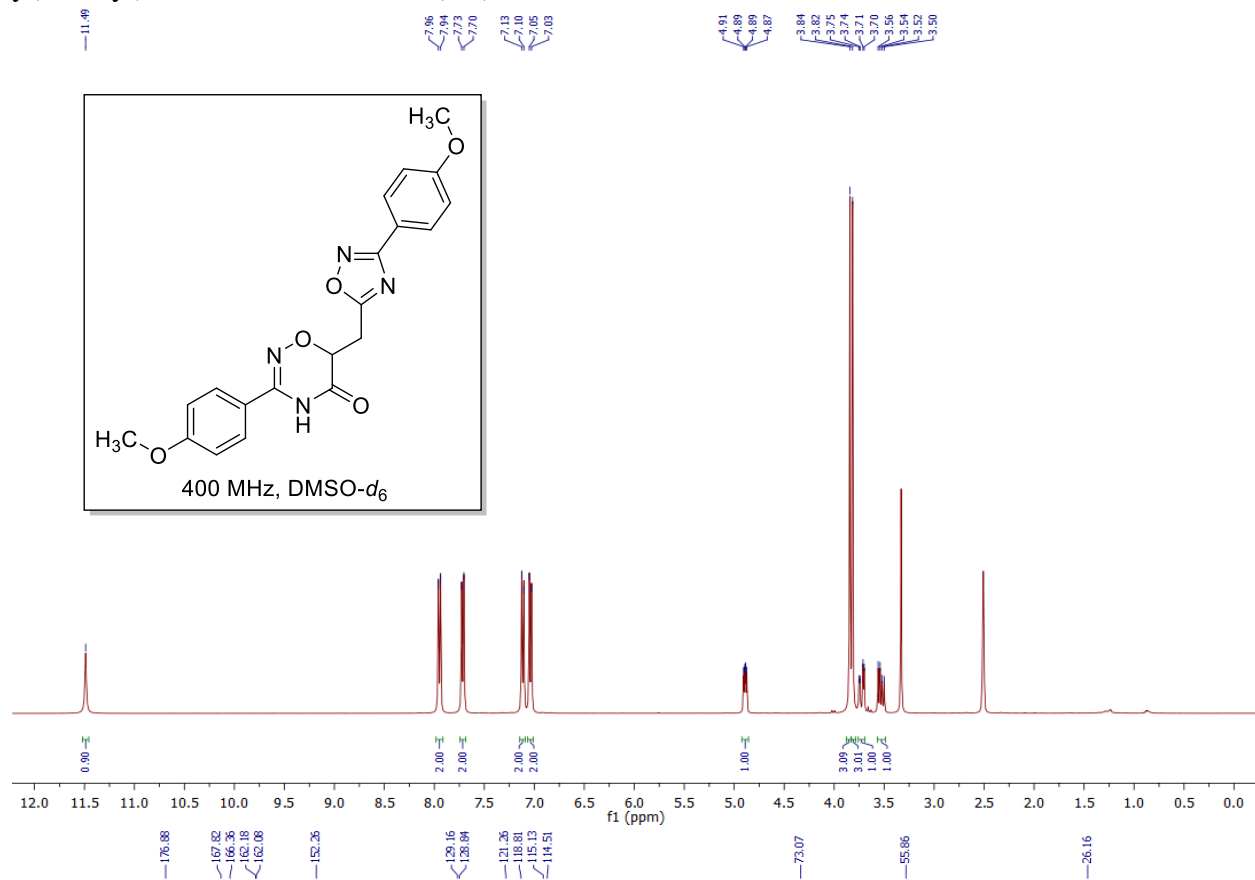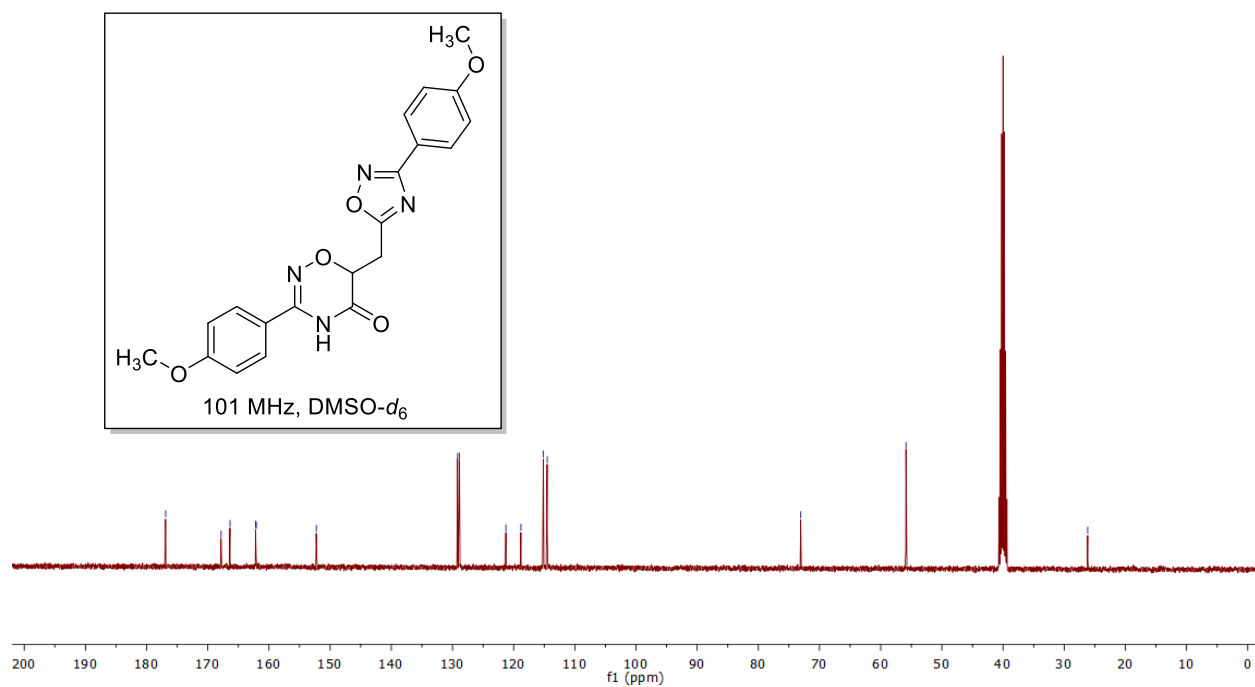

$^1\text{H}$  and  $^{13}\text{C}$  spectra of 3-(4-nitrophenyl)-6-((3-(4-nitrophenyl)-1,2,4-oxadiazol-5-yl)methyl)-4*H*-1,2,4-oxadiazin-5(6*H*)-one **5d**

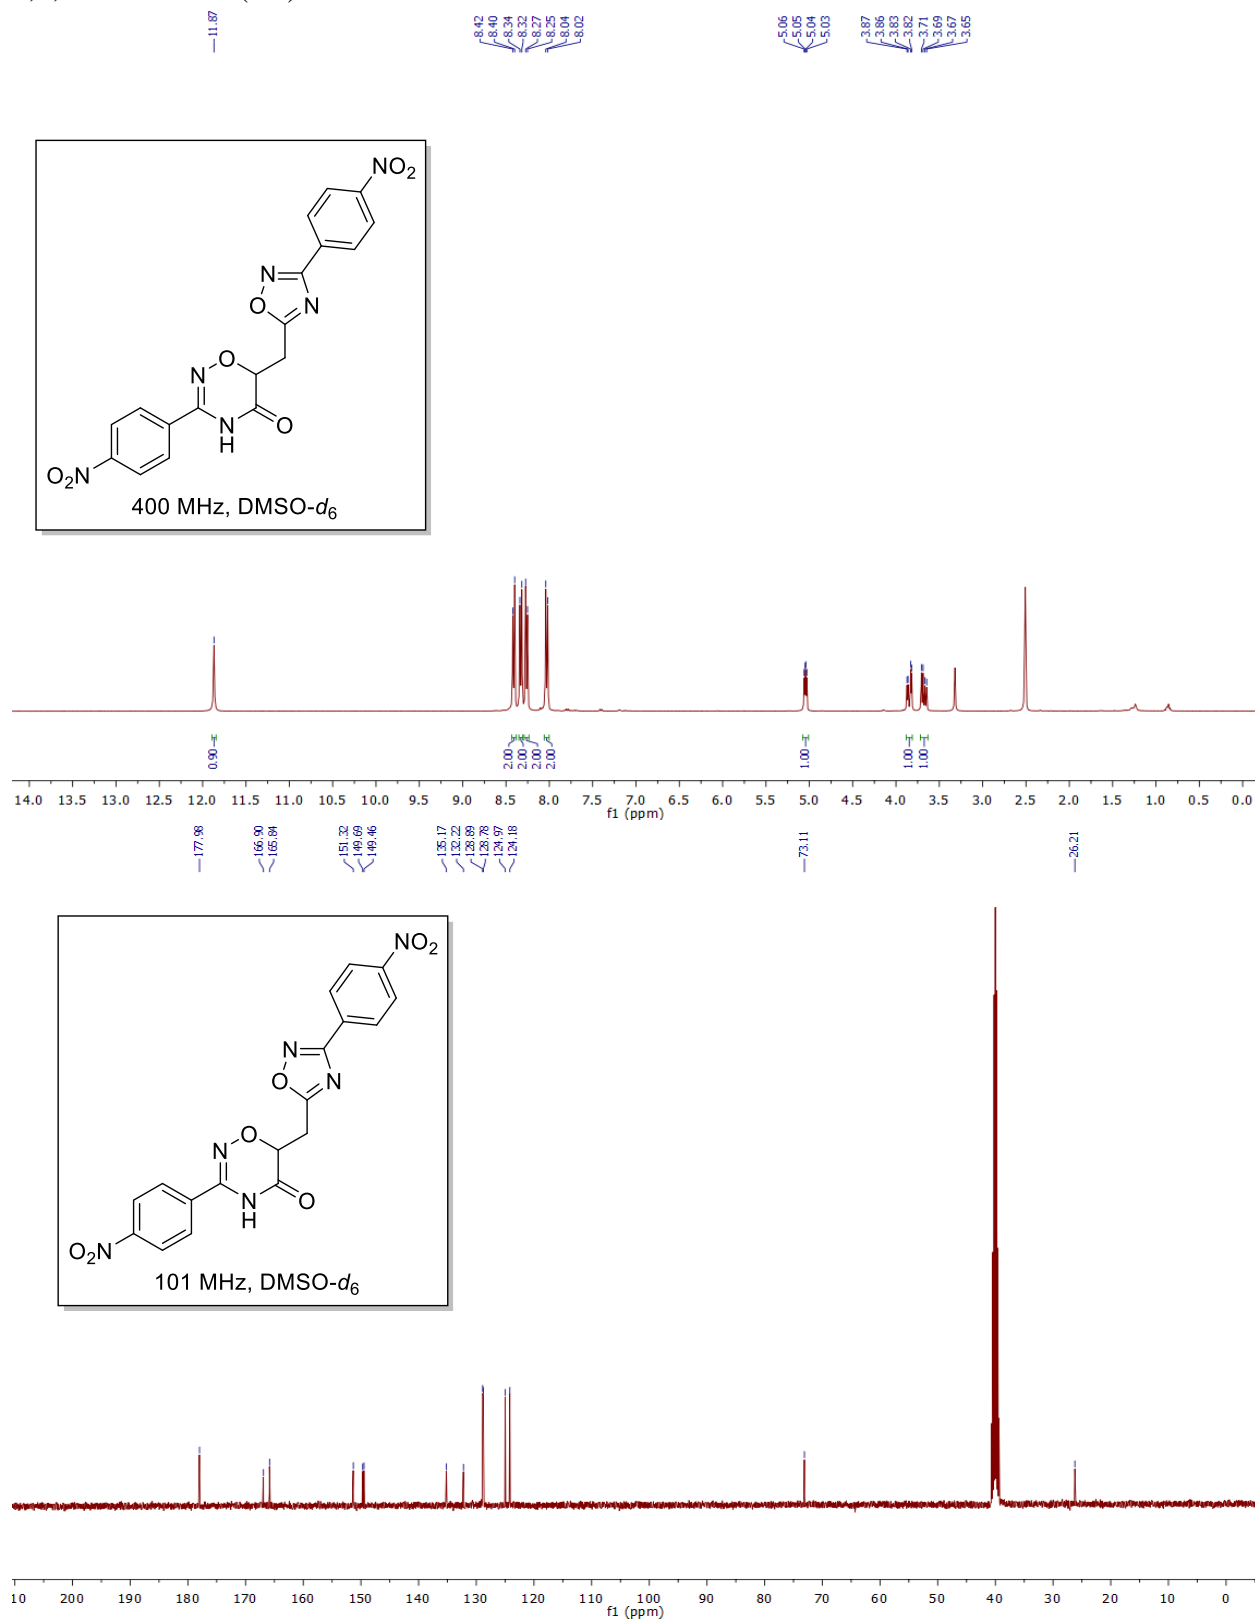



$^1\text{H}$ ,  $^{13}\text{C}$  and  $^{19}\text{F}$  spectra of 3-(4-(trifluoromethyl)phenyl)-6-((3-(4-(trifluoromethyl)phenyl)-1,2,4-oxadiazol-5-yl)methyl)-4*H*-1,2,4-oxadiazin-5(6*H*)-one **5e**

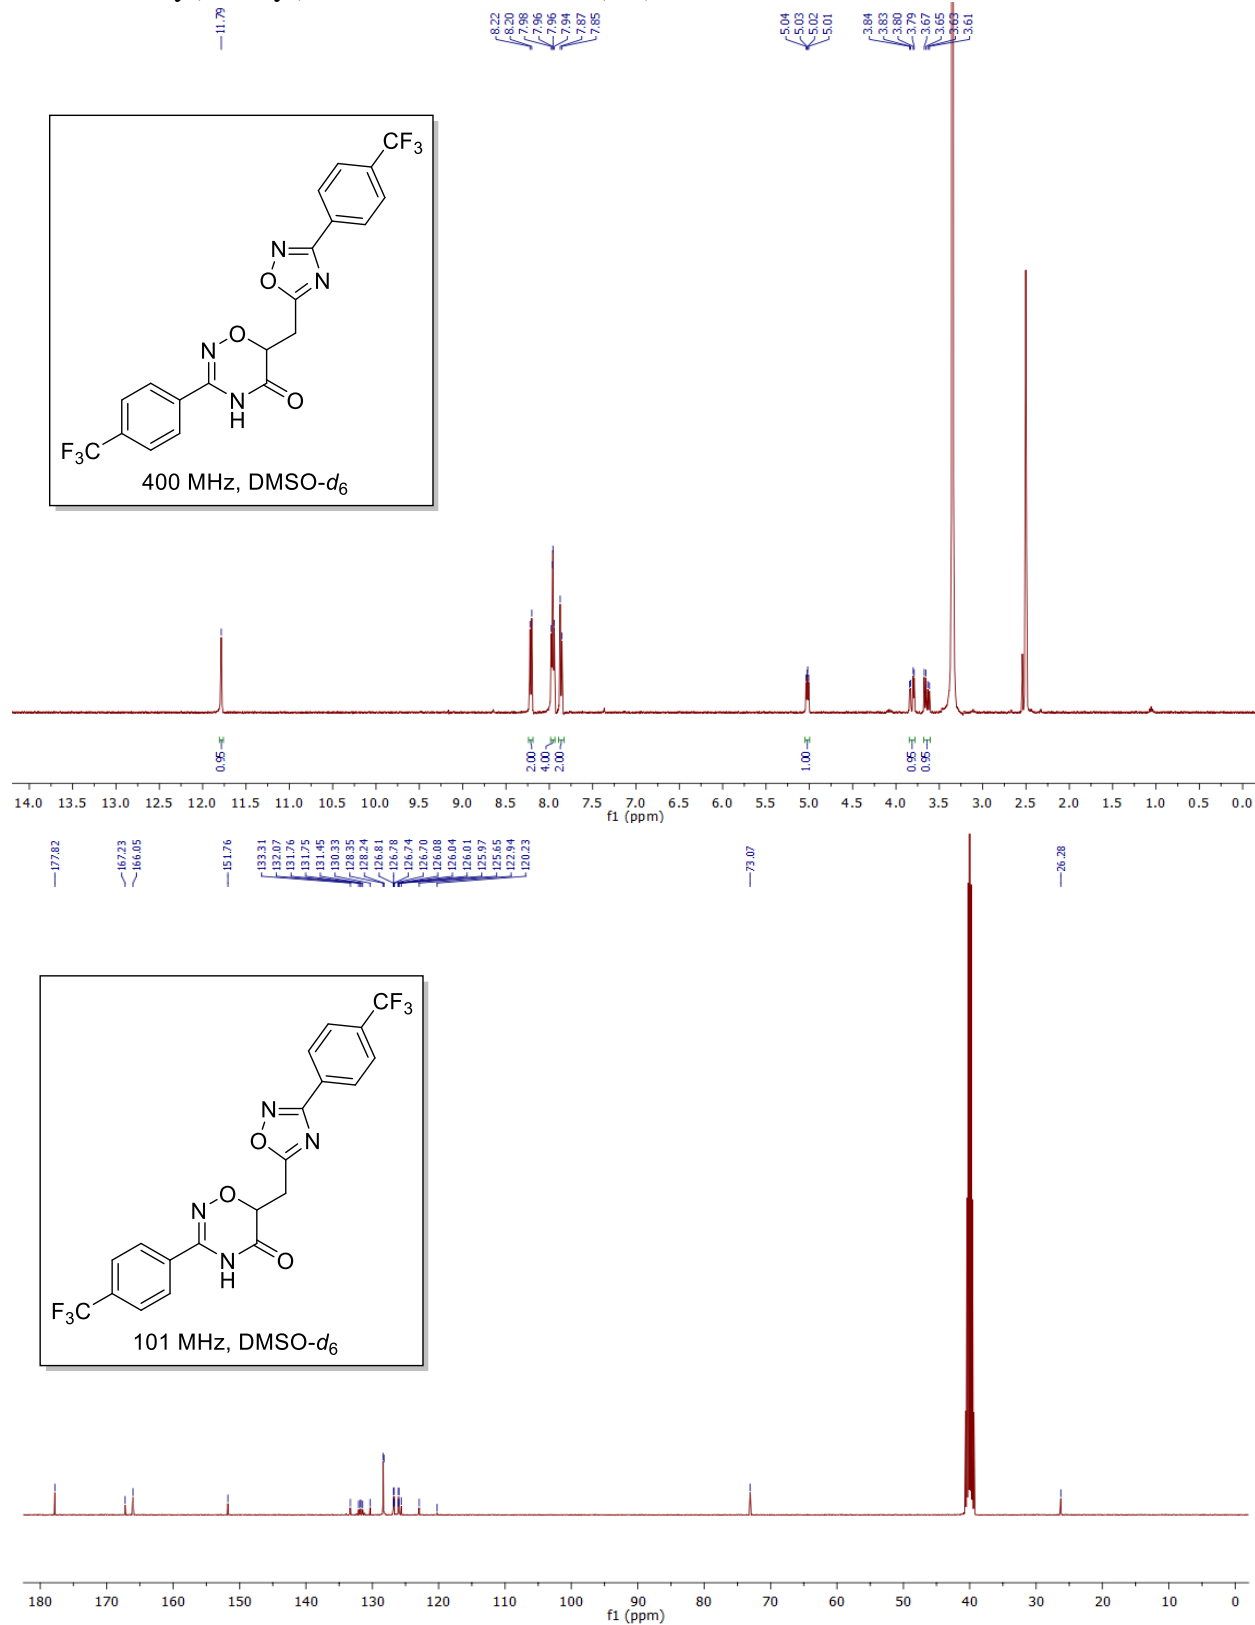

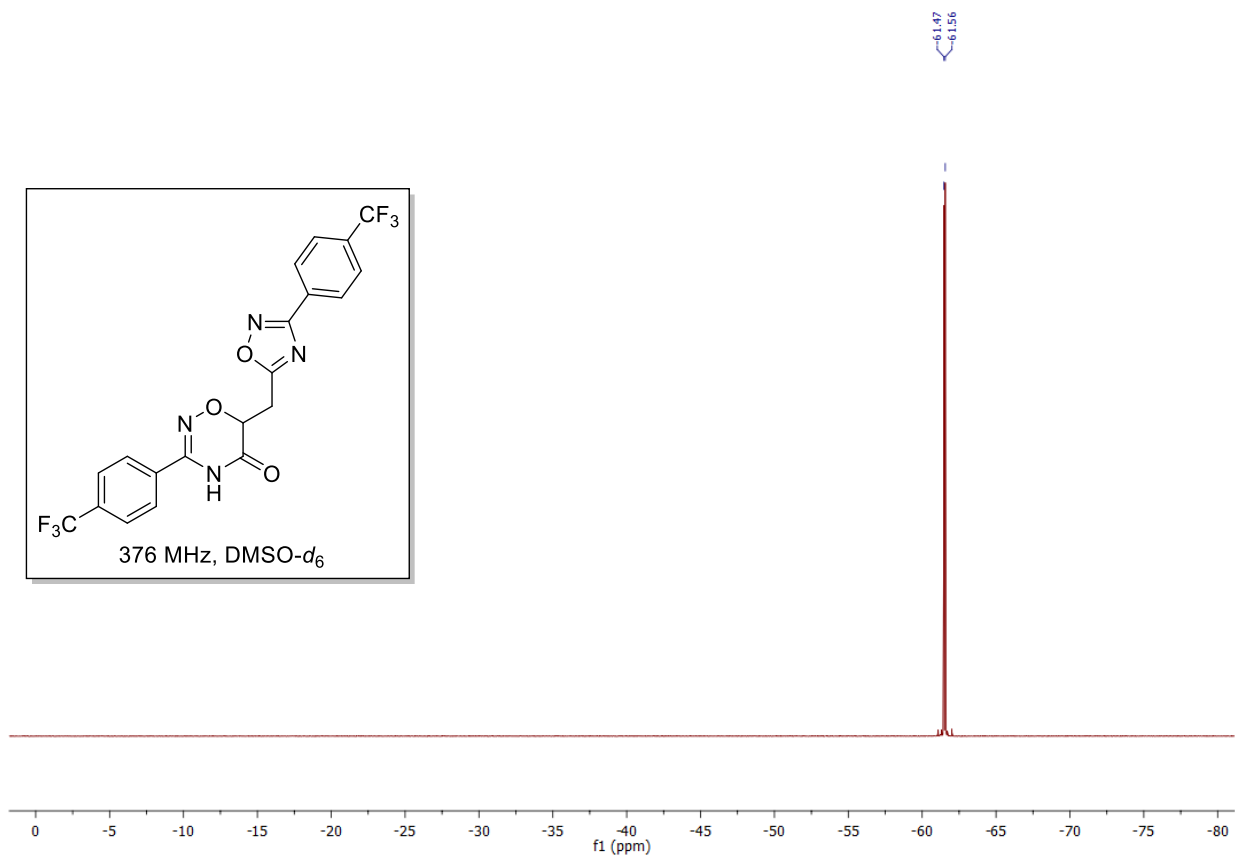

$^1\text{H}$ ,  $^{13}\text{C}$  and  $^{19}\text{F}$  spectra of 3-(4-fluorophenyl)-6-((3-(4-fluorophenyl)-1,2,4-oxadiazol-5-yl)methyl)-4*H*-1,2,4-oxadiazin-5(6*H*)-one **5f**

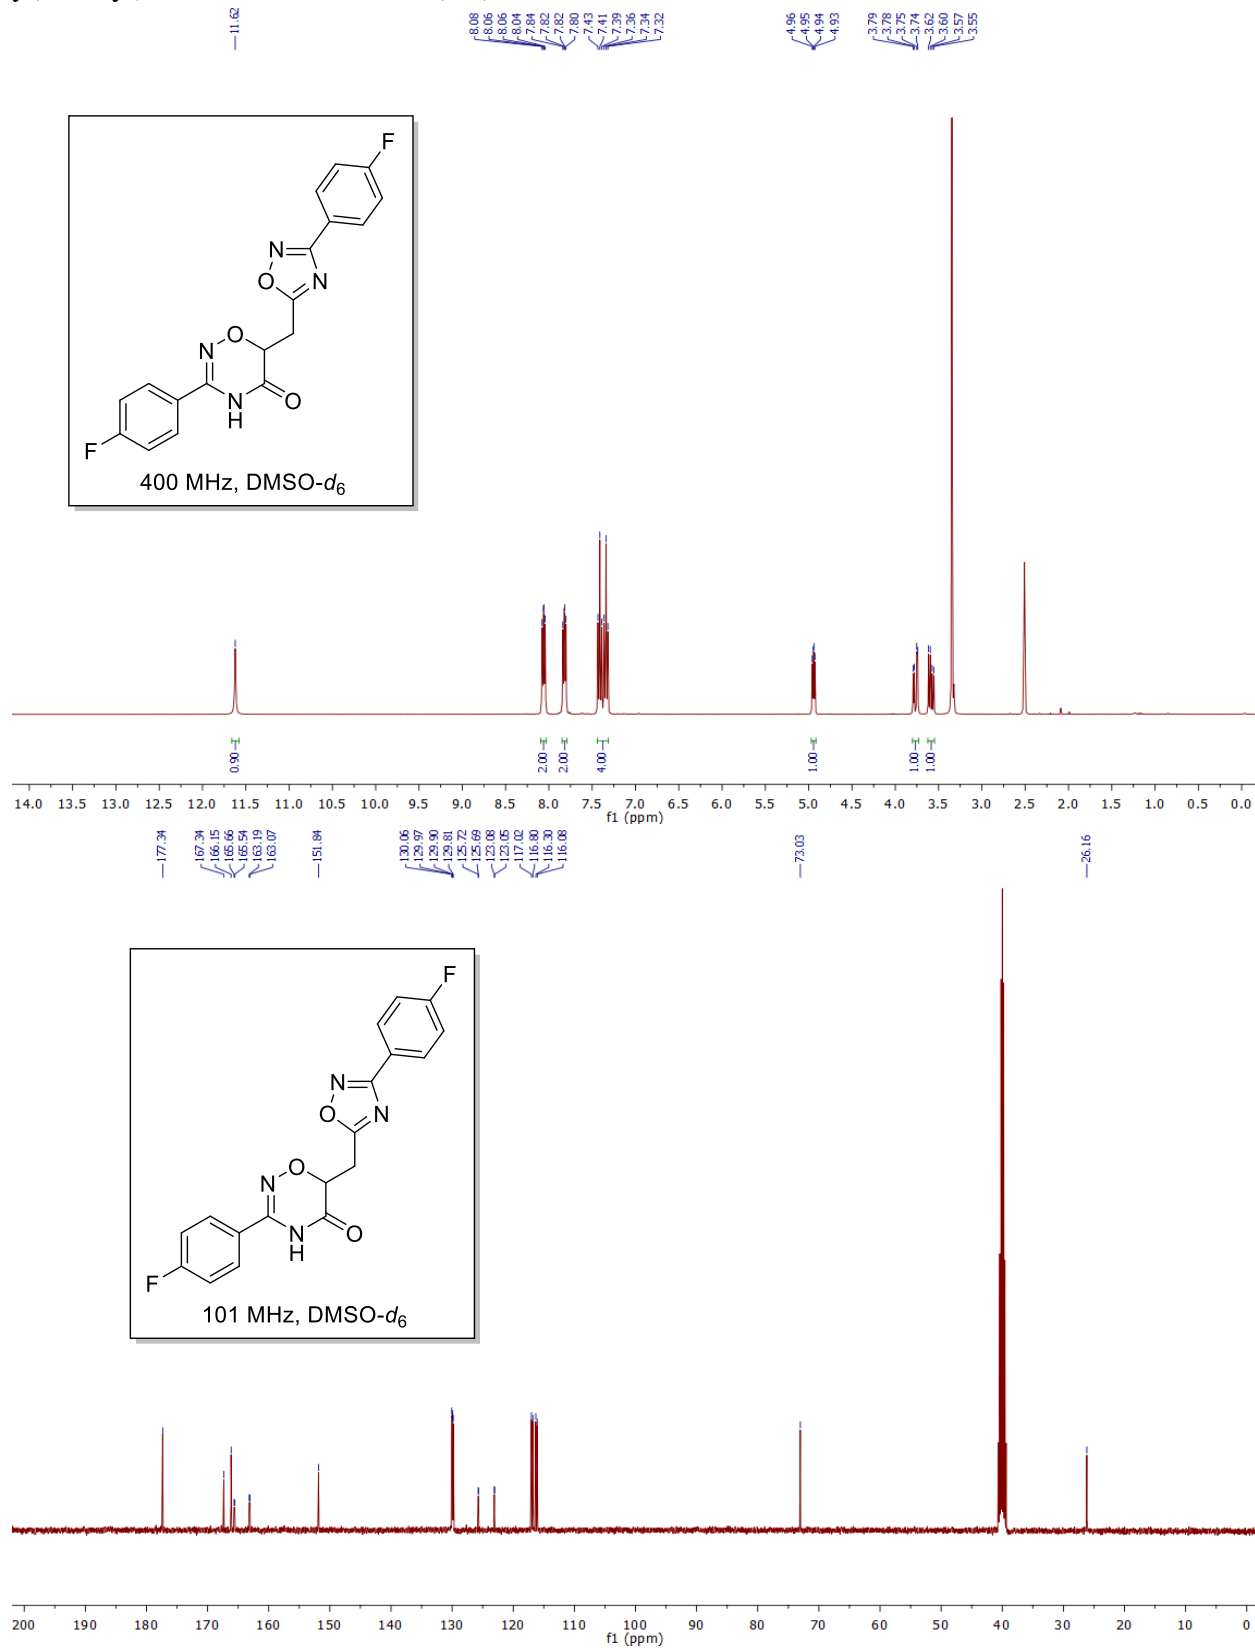

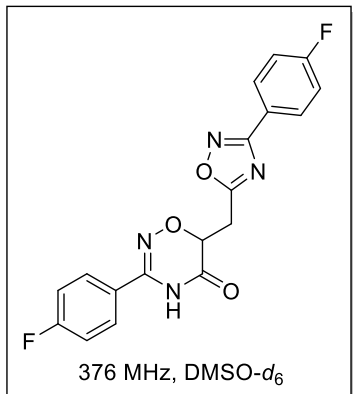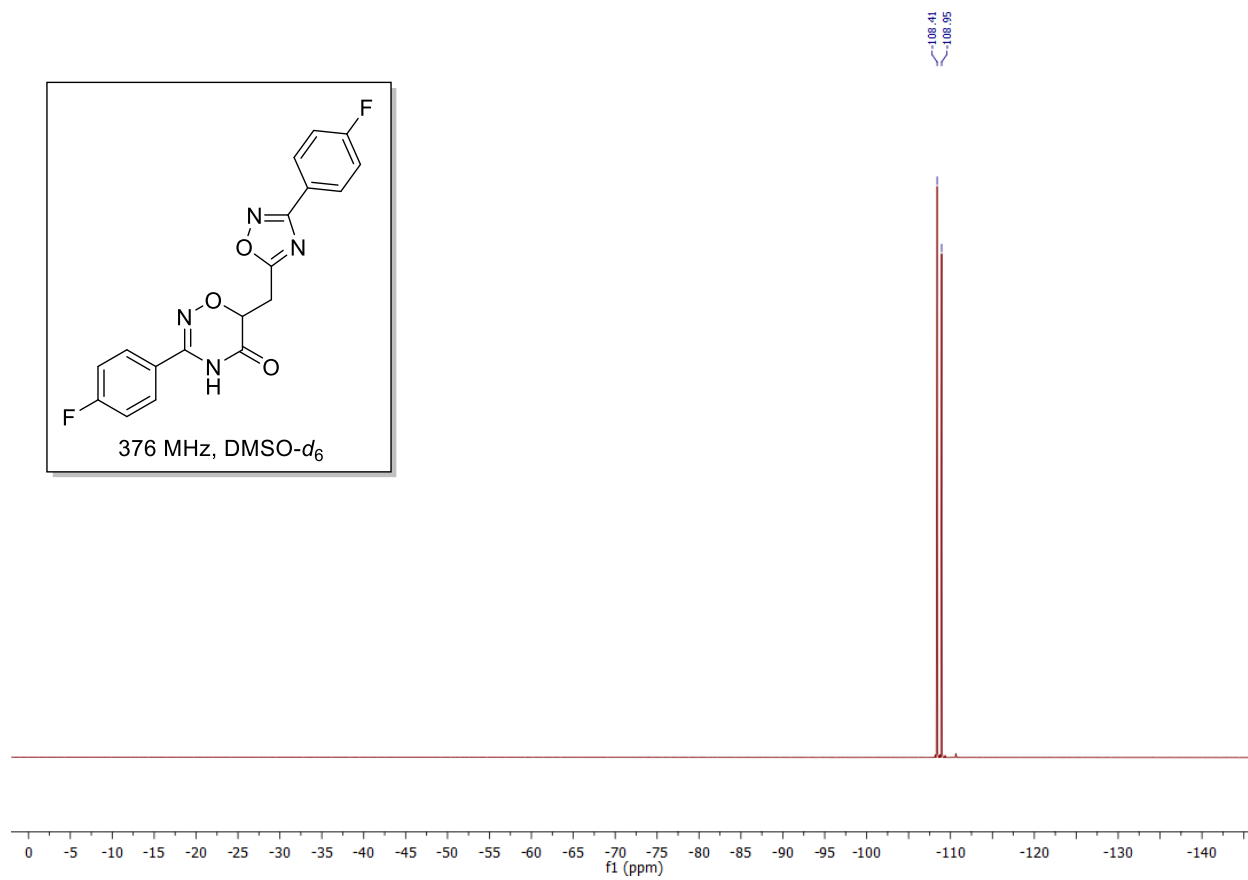

$^1\text{H}$  and  $^{13}\text{C}$  spectra of 3-(4-chlorophenyl)-6-((3-(4-chlorophenyl)-1,2,4-oxadiazol-5-yl)methyl)-4*H*-1,2,4-oxadiazin-5(6*H*)-one **5g**

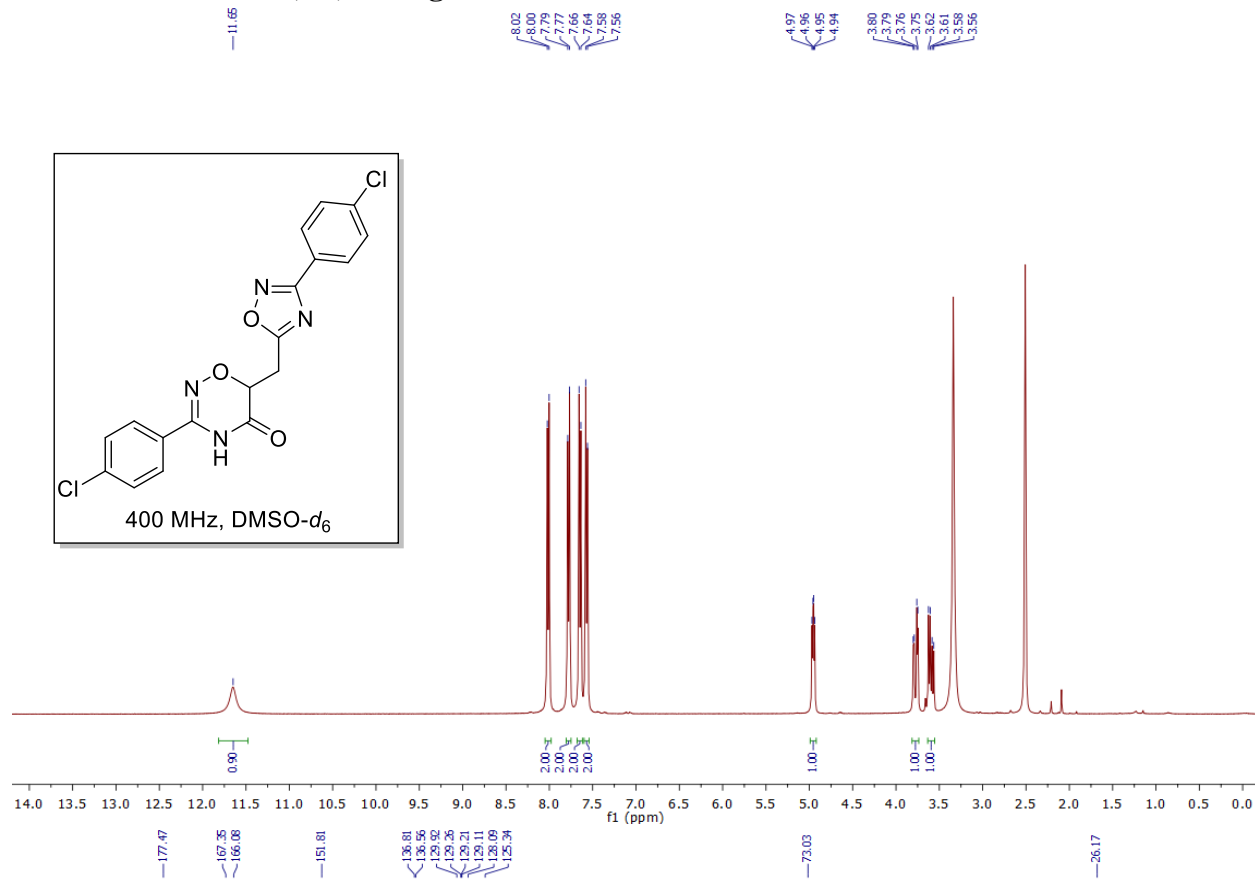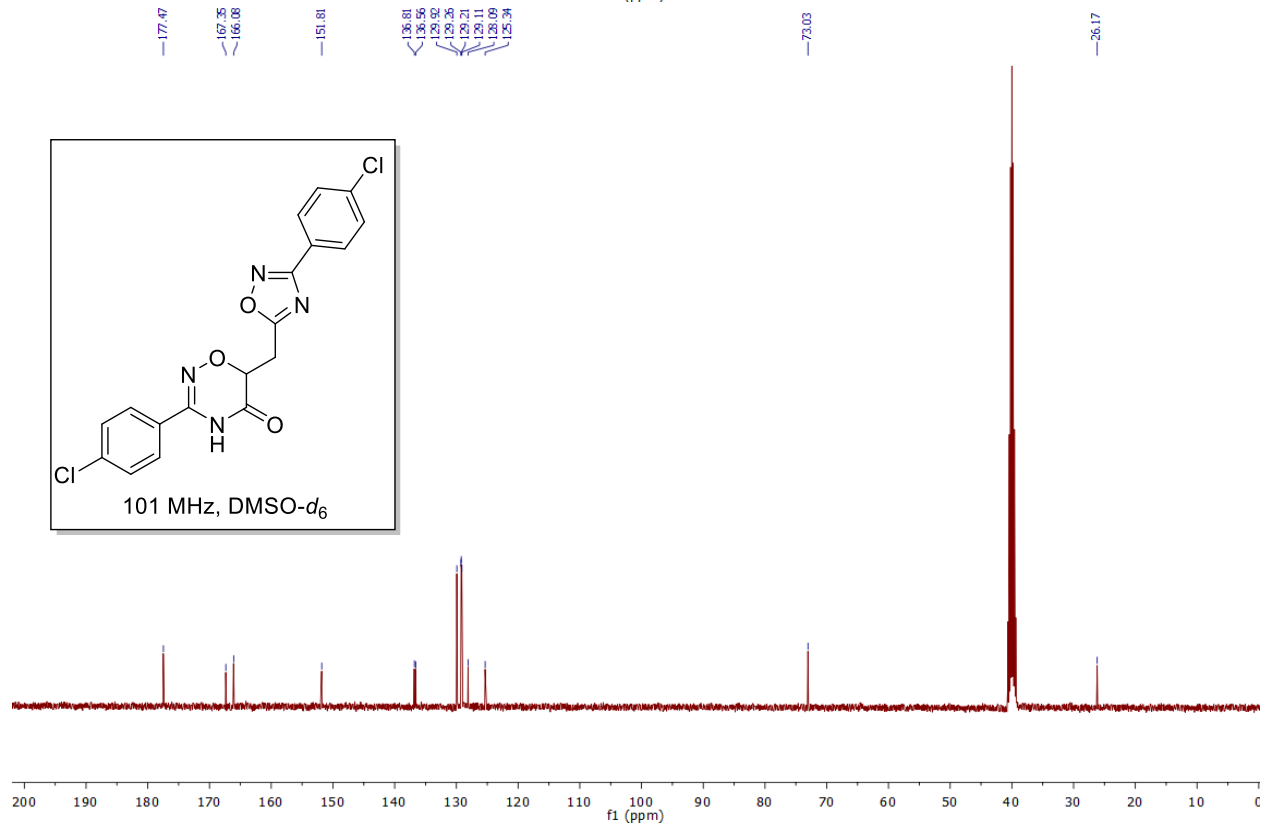

$^1\text{H}$  and  $^{13}\text{C}$  spectra of 3-(4-aminophenyl)-6-((3-(4-aminophenyl)-1,2,4-oxadiazol-5-yl)methyl)-4H-1,2,4-oxadiazin-5(6H)-one **5h**

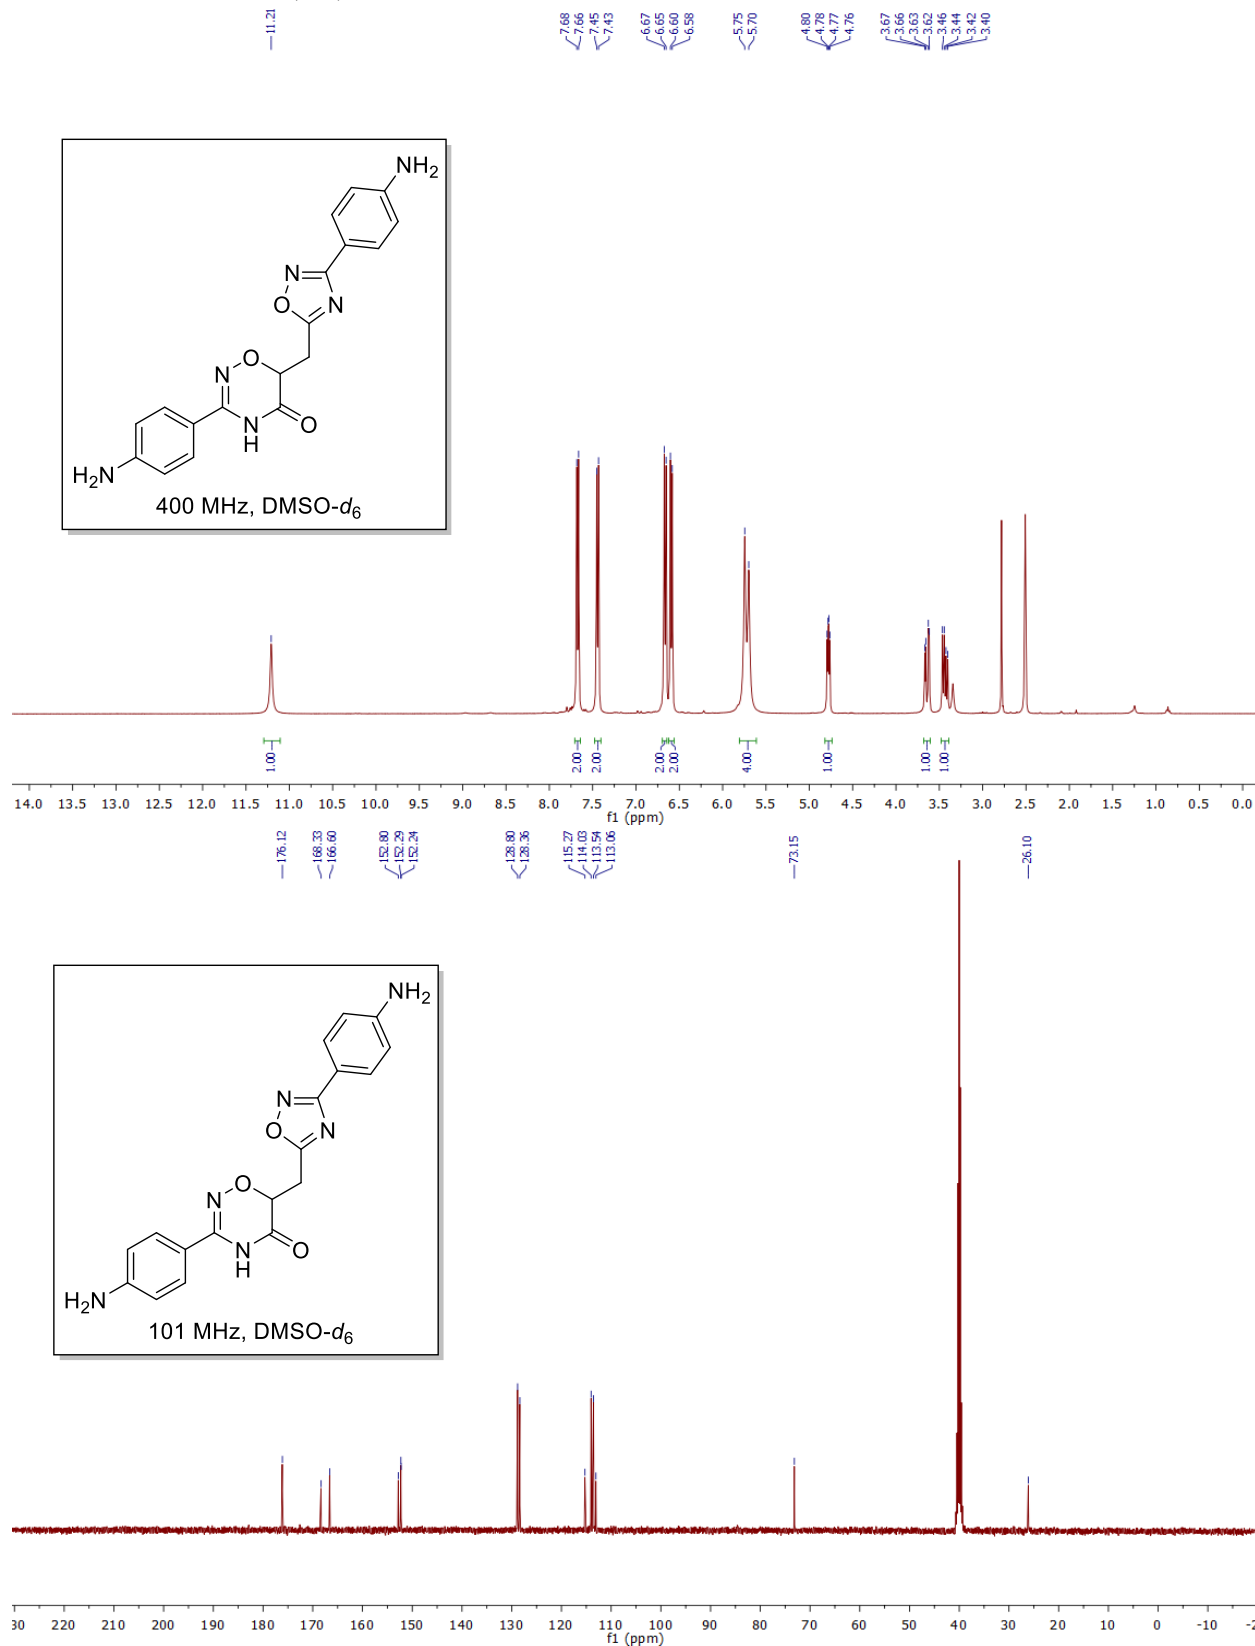

$^1\text{H}$  and  $^{13}\text{C}$  spectra of 3-(2-chlorophenyl)-6-((3-(2-chlorophenyl)-1,2,4-oxadiazol-5-yl)methyl)-4*H*-1,2,4-oxadiazin-5(6*H*)-one **5i**

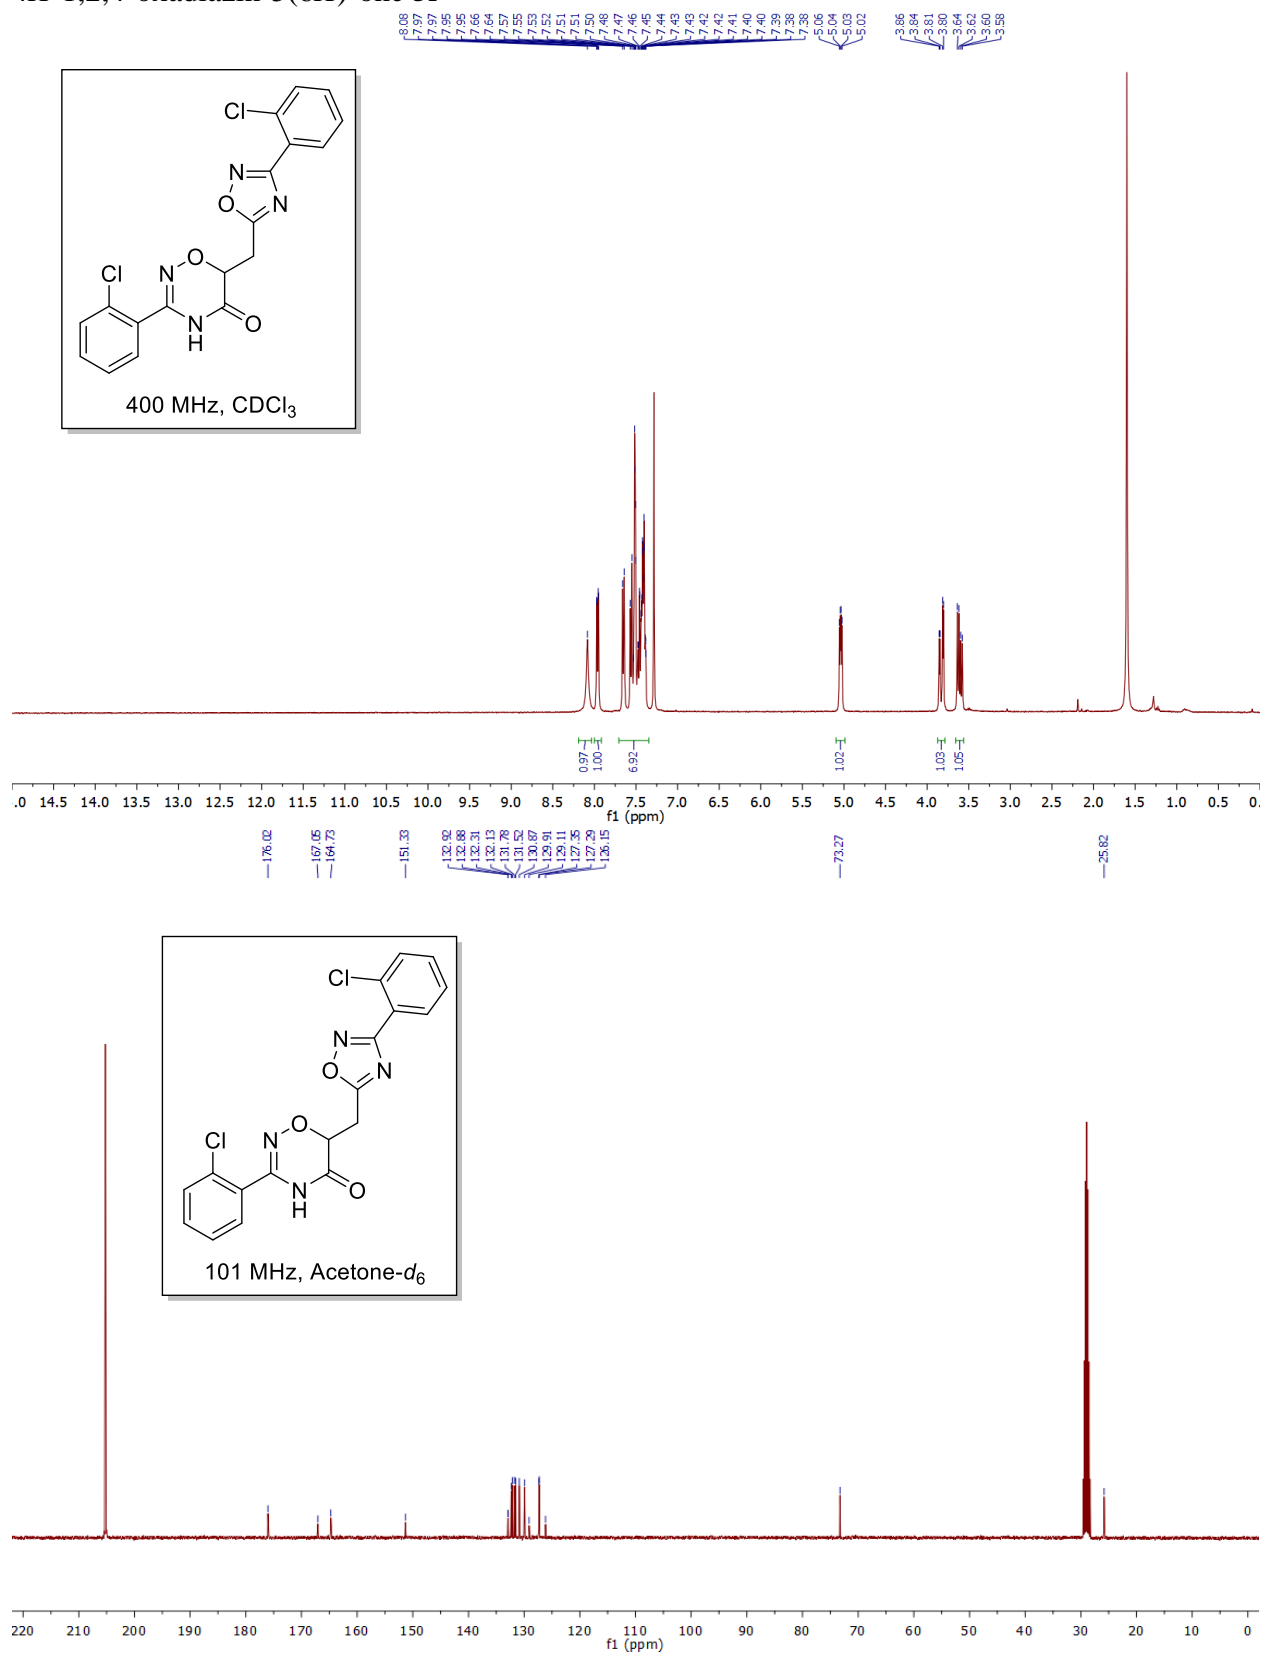

$^1\text{H}$  and  $^{13}\text{C}$  spectra of 3-(5-methylthiophen-2-yl)-6-((3-(5-methylthiophen-2-yl)-1,2,4-oxadiazol-5-yl)methyl)-4*H*-1,2,4-oxadiazin-5(6*H*)-one **5j**

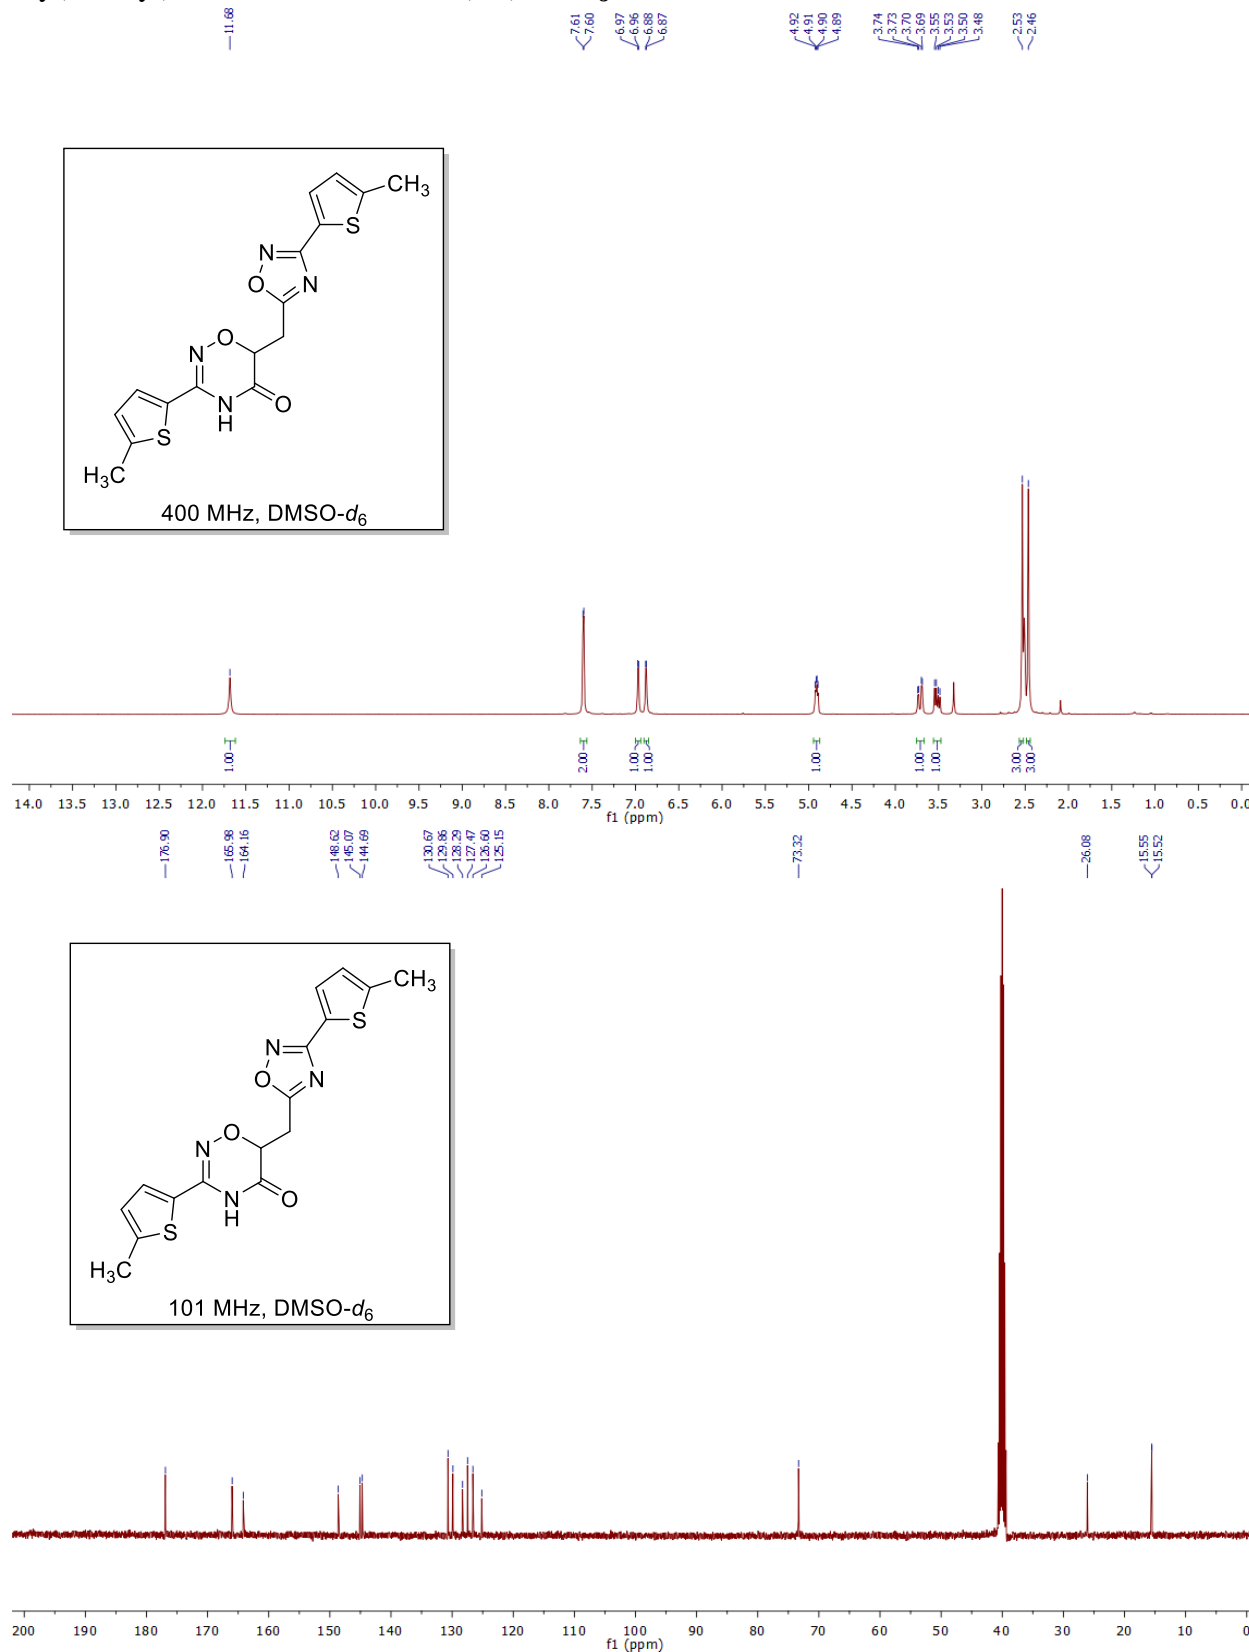



$^1\text{H}$  and  $^{13}\text{C}$  spectra of 3-(pyridin-4-yl)-6-((3-(pyridin-4-yl)-1,2,4-oxadiazol-5-yl)methyl)-4*H*-1,2,4-oxadiazin-5(6*H*)-one **5k**

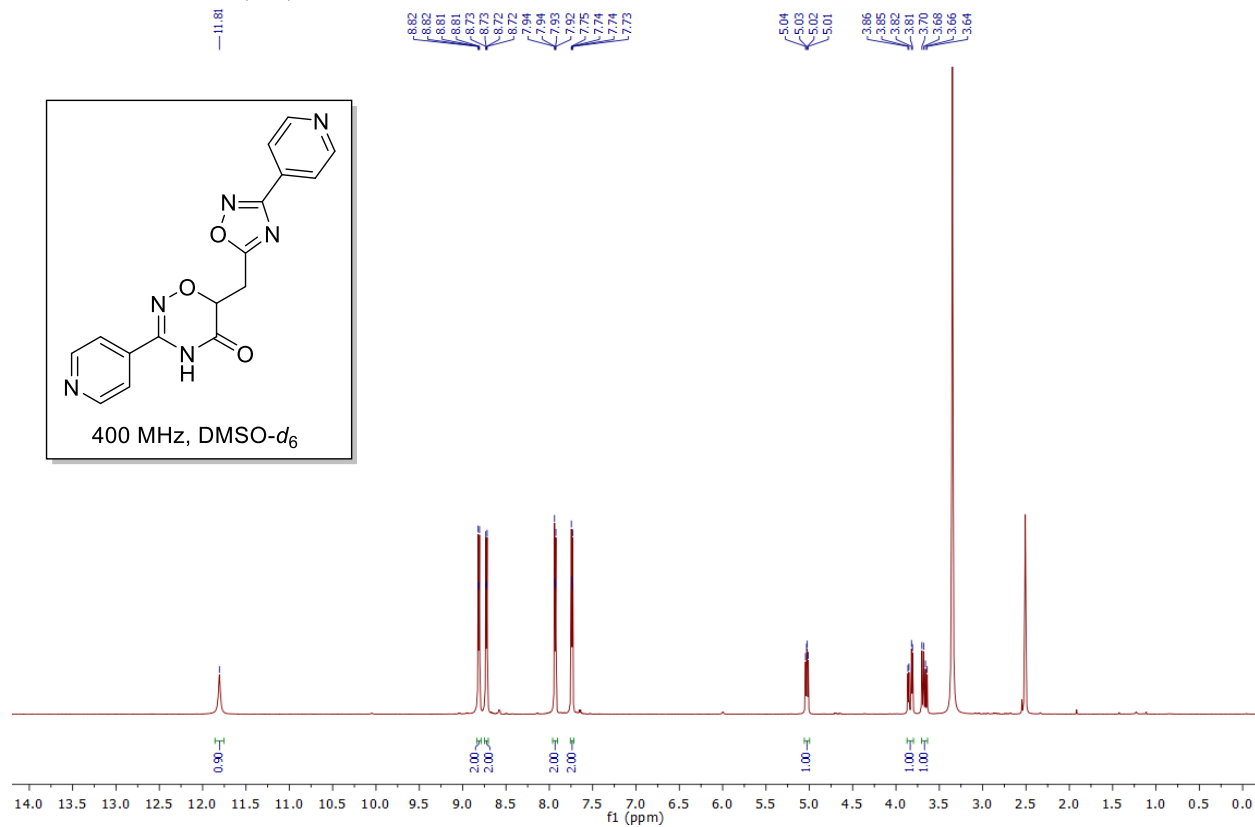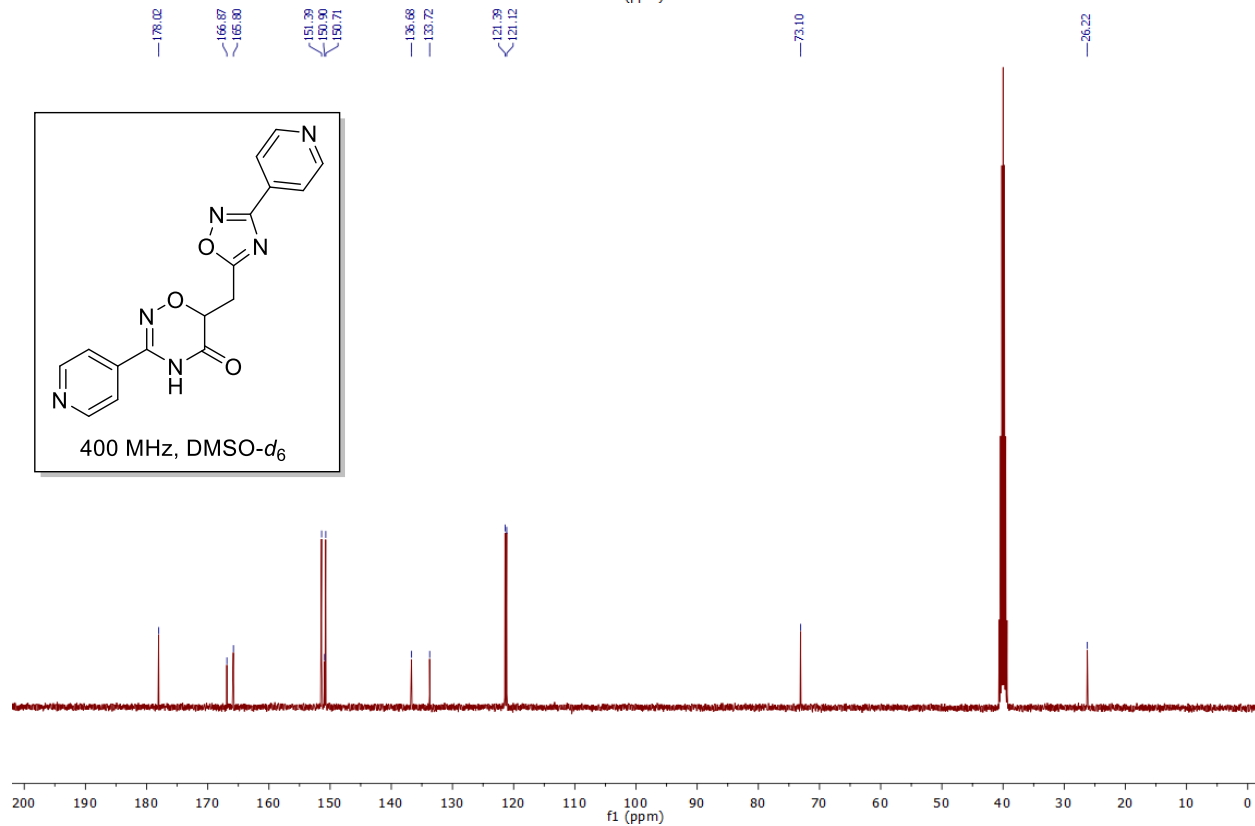

$^1\text{H}$  and  $^{13}\text{C}$  spectra of 3-(pyridin-2-yl)-6-((3-(pyridin-2-yl)-1,2,4-oxadiazol-5-yl)methyl)-4*H*-1,2,4-oxadiazin-5(6*H*)-one **51**

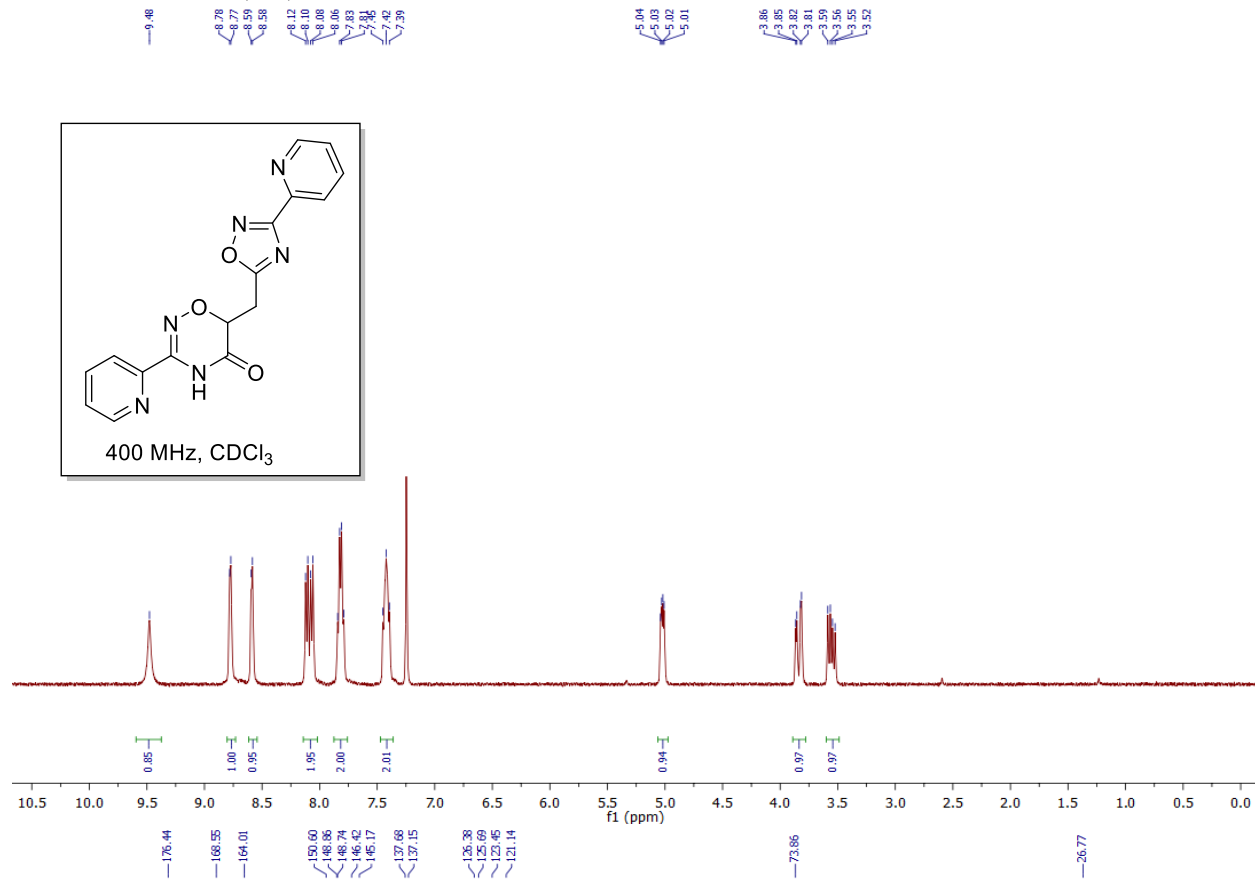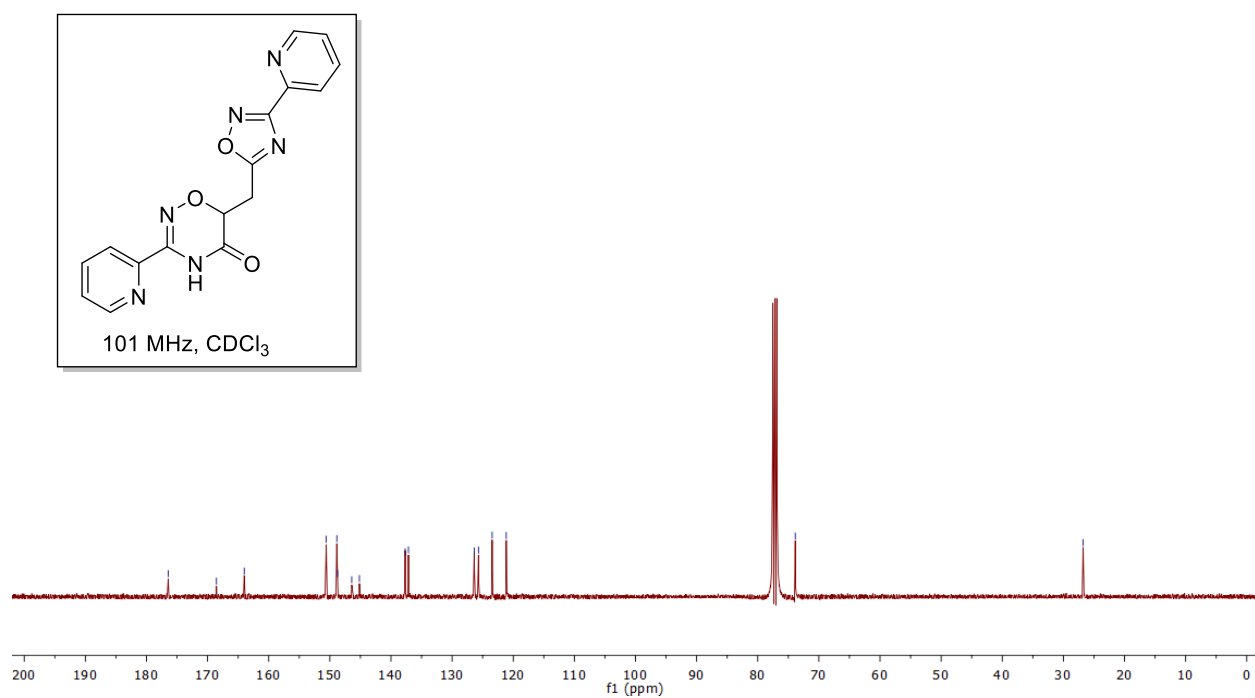

## 2. X-ray diffraction data

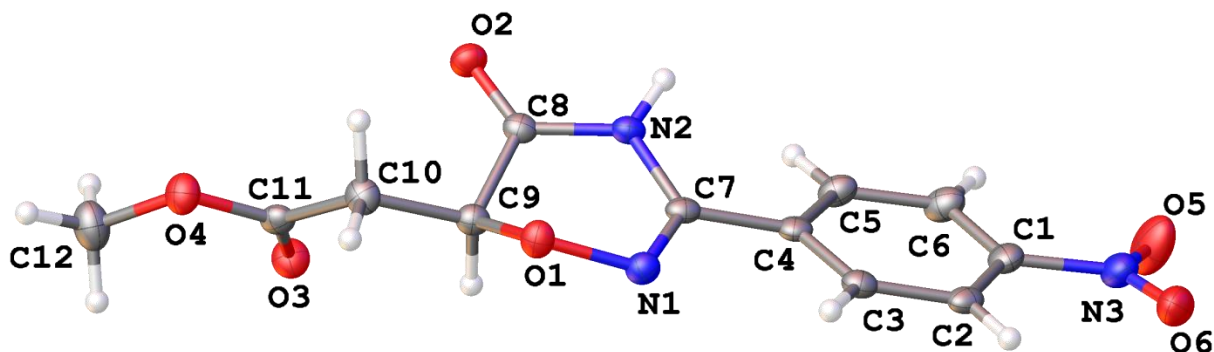

**Figure S1.** View of the molecular structure of **4d**. Thermal ellipsoids are drawn at the 50% probability level.

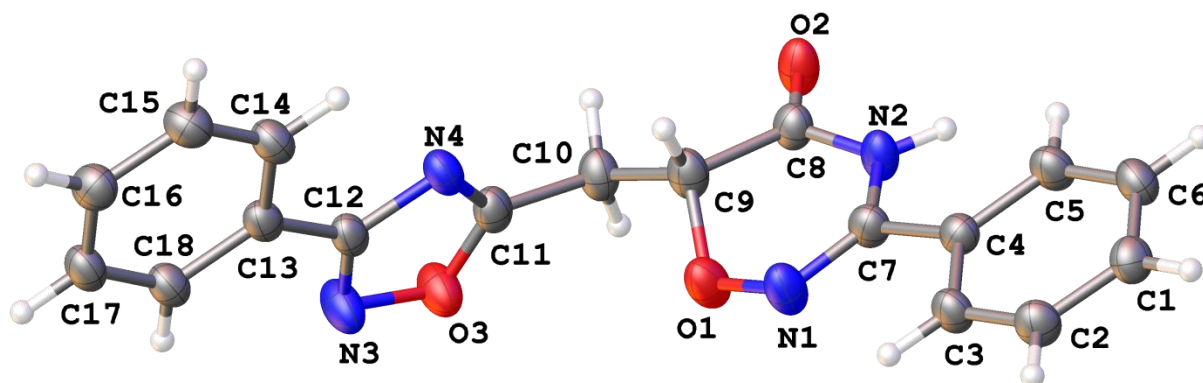

**Figure S2.** View of the molecular structure of **5b**. Thermal ellipsoids are drawn at the 50% probability level.

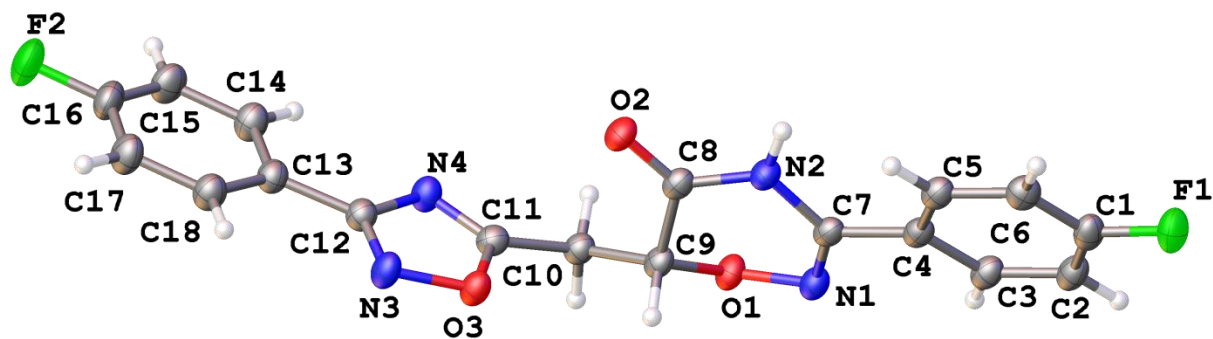

**Figure S3.** View of the molecular structure of **5f**. Thermal ellipsoids are drawn at the 50% probability level.

**Table S1.** Crystal data and structure refinement parameters for **4d**, **5b**, and **5f**.

| Compound                                     | <b>4d</b>                                                         | <b>5b</b>                                                        | <b>5f</b>                                                                    |
|----------------------------------------------|-------------------------------------------------------------------|------------------------------------------------------------------|------------------------------------------------------------------------------|
| Identification code                          | SAV5                                                              | OZI-09                                                           | CJL-151                                                                      |
| CCDC number                                  | 2210873                                                           | 2210875                                                          | 2210876                                                                      |
| Empirical formula                            | C <sub>24</sub> H <sub>22</sub> N <sub>6</sub> O <sub>12</sub>    | C <sub>18</sub> H <sub>14</sub> N <sub>4</sub> O <sub>3</sub>    | C <sub>18</sub> H <sub>12</sub> F <sub>2</sub> N <sub>4</sub> O <sub>3</sub> |
| Formula weight                               | 586.47                                                            | 334.33                                                           | 370.32                                                                       |
| Temperature, K                               | 100(2)                                                            | 100(2)                                                           | 100(2)                                                                       |
| Crystal system                               | monoclinic                                                        | triclinic                                                        | triclinic                                                                    |
| Space group                                  | C2/c                                                              | P-1                                                              | P-1                                                                          |
| a, Å                                         | 21.0394(11)                                                       | 5.6292(2)                                                        | 6.2398(2)                                                                    |
| b, Å                                         | 6.8178(3)                                                         | 9.9963(3)                                                        | 7.9297(3)                                                                    |
| c, Å                                         | 18.9521(10)                                                       | 14.3394(4)                                                       | 16.7543(4)                                                                   |
| $\alpha$ , °                                 | 90                                                                | 97.054(2)                                                        | 78.848(2)                                                                    |
| $\beta$ , °                                  | 98.851(5)                                                         | 99.633(3)                                                        | 80.191(2)                                                                    |
| $\gamma$ , °                                 | 90                                                                | 103.958(3)                                                       | 89.581(3)                                                                    |
| Volume, Å <sup>3</sup>                       | 2686.2(2)                                                         | 760.72(4)                                                        | 801.17(4)                                                                    |
| Z                                            | 4                                                                 | 2                                                                | 2                                                                            |
| $\rho_{\text{calc}}$ , g, cm <sup>3</sup>    | 1.450                                                             | 1.460                                                            | 1.535                                                                        |
| $\mu$ , mm <sup>-1</sup>                     | 0.119                                                             | 0.850                                                            | 1.055                                                                        |
| F(000)                                       | 1216.0                                                            | 348.0                                                            | 380.0                                                                        |
| Crystal size, mm <sup>3</sup>                | 0.16 × 0.14 × 0.13                                                | 0.18 × 0.16 × 0.13                                               | 0.15 × 0.14 × 0.12                                                           |
| Radiation                                    | MoK $\alpha$ ( $\lambda$ = 0.71073)                               | CuK $\alpha$ ( $\lambda$ = 1.54184)                              | CuK $\alpha$ ( $\lambda$ = 1.54184)                                          |
| 2 $\Theta$ range for data collection, °      | 6.288 to 54.998                                                   | 6.344 to 154.134                                                 | 5.458 to 140.882                                                             |
| Index ranges                                 | −27 ≤ h ≤ 27<br>−8 ≤ k ≤ 8,<br>−24 ≤ l ≤ 24                       | −5 ≤ h ≤ 6,<br>−12 ≤ k ≤ 12,<br>−18 ≤ l ≤ 17                     | −7 ≤ h ≤ 7,<br>−9 ≤ k ≤ 9,<br>−20 ≤ l ≤ 20                                   |
| Reflections collected                        | 20491                                                             | 21795                                                            | 12627                                                                        |
| Independent reflections                      | 3015 [ $R_{\text{int}}$ = 0.0313,<br>$R_{\text{sigma}}$ = 0.0188] | 3132 [ $R_{\text{int}}$ = 0.0436<br>$R_{\text{sigma}}$ = 0.0236] | 3026 [ $R_{\text{int}}$ = 0.0397,<br>$R_{\text{sigma}}$ = 0.0375]            |
| Data/restraints/parameters                   | 3015/0/191                                                        | 3132/0/226                                                       | 3026/0/244                                                                   |
| Goodness-of-fit on F <sup>2</sup>            | 1.060                                                             | 1.077                                                            | 1.043                                                                        |
| Final R indexes [ $I \geq 2\sigma$ (I)]      | $R_1$ = 0.0472<br>$wR_2$ = 0.1232                                 | $R_1$ = 0.0462,<br>$wR_2$ = 0.1303                               | $R_1$ = 0.0401,<br>$wR_2$ = 0.1085                                           |
| Final R indexes [all data]                   | $R_1$ = 0.0529<br>$wR_2$ = 0.1274                                 | $R_1$ = 0.0505,<br>$wR_2$ = 0.1345                               | $R_1$ = 0.0445,<br>$wR_2$ = 0.1141                                           |
| Largest diff. peak/hole/<br>eÅ <sup>-3</sup> | 0.47/−0.24                                                        | 0.85/−0.31                                                       | 0.24/−0.24                                                                   |
